# Supplementary material for: Electro- and photoelectro-catalysts derived from bimetallic amorphous metal–organic frameworks
Source: Royal Society of Chemistry journal article supplement (doi:10.1039/d0cy01600d), 2020-01-01
Supplement: d0cy01600d1.pdf [file d0cy01600d1.pdf]

## Supporting Information

### **Electro- and Photoelectro- Catalysts Derived from Bimetallic Amorphous Metal-Organic Frameworks**

*Javier Fonseca\**, and *Sunho Choi\**

Nanomaterial Laboratory for Catalysis and Advanced Separations, Department of Chemical  
Engineering, Northeastern University, 313 Snell Engineering Center, 360 Huntington  
Avenue, Boston, Massachusetts 02115-5000, United States

\* Corresponding Author.

E-mail: [fonsecagarcia.j@northeastern.edu](mailto:fonsecagarcia.j@northeastern.edu)

## Table of Contents

|                                                                                                                                                      |    |
|------------------------------------------------------------------------------------------------------------------------------------------------------|----|
| <b>1. Supplementary Figures</b> .....                                                                                                                | 5  |
| <b>Figure S1.</b> $^1\text{H}$ NMR (500 MHz, $\text{CDCl}_3$ ) spectra of 4'-(2-furyl)-2,2':6',2''-terpyridine .....                                 | 5  |
| <b>Figure S2.</b> DSC of 4'-(2-furyl)-2,2':6',2''-terpyridine .....                                                                                  | 6  |
| <b>Figure S3.</b> $^1\text{H}$ NMR (500 MHz, $\text{CD}_3\text{CN}$ ) spectra of $(\text{FeTpyCOOH})(\text{PF}_6)_2$ .....                           | 7  |
| <b>Figure S4.</b> DSC of $(\text{FeTpyCOOH})(\text{PF}_6)_2$ .....                                                                                   | 8  |
| <b>Figure S5.</b> $^1\text{H}$ NMR (500 MHz, $\text{DMSO-d}_6$ ) spectra of [2,2':6',2''-terpyridine]-4'-carboxylic acid .....                       | 9  |
| <b>Figure S6.</b> DSC of [2,2':6',2''-terpyridine]-4'-carboxylic acid .....                                                                          | 10 |
| <b>Figure S7.</b> $^1\text{H}$ NMR (500 MHz, $\text{DMSO-d}_6$ ) spectra of $(\text{Ru}(\text{terpy}^*)_2)(\text{PF}_6)_2$ .....                     | 11 |
| <b>Figure S8.</b> DSC of $(\text{Ru}(\text{terpy}^*)_2)(\text{PF}_6)_2$ .....                                                                        | 12 |
| <b>Figure S9.</b> Coordinates of each atom in the local molecular structure of zinc within NEU-5. 13                                                 |    |
| <b>Figure S10.</b> X-ray absorption spectrum at the Zn K-edge of the NEU-5 .....                                                                     | 15 |
| <b>Figure S11.</b> Coordinates of each atom in the local molecular structure of iron within NEU-5. ....                                              | 16 |
| <b>Figure S12.</b> X-ray absorption spectrum at the Fe K-edge of the NEU-5 .....                                                                     | 18 |
| <b>Figure S13.</b> EDX characterization of NEU-5 .....                                                                                               | 19 |
| <b>Figure S14.</b> EDX characterization of NEU-5 .....                                                                                               | 20 |
| <b>Figure S15.</b> EDX characterization of NEU-6 .....                                                                                               | 21 |
| <b>Figure S16.</b> EDX characterization of NEU-6 .....                                                                                               | 22 |
| <b>Figure S17.</b> EDX characterization of NEU-7 .....                                                                                               | 23 |
| <b>Figure S18.</b> EDX characterization of NEU-7 .....                                                                                               | 24 |
| <b>Figure S19.</b> EDX characterization of NEU-8 .....                                                                                               | 25 |
| <b>Figure S20.</b> EDX characterization of NEU-8 .....                                                                                               | 26 |
| <b>Figure S21.</b> TGA of NEU-5 .....                                                                                                                | 27 |
| <b>Figure S22.</b> TGA of NEU-6 .....                                                                                                                | 28 |
| <b>Figure S23.</b> TGA of NEU-7 .....                                                                                                                | 29 |
| <b>Figure S24.</b> TGA of NEU-8 .....                                                                                                                | 30 |
| <b>Figure S25.</b> Nitrogen adsorption/desorption isotherms of pristine NEU-5 and $\text{Fe}_2\text{P@PNDCN}$ . ....                                 | 31 |
| <b>Figure S26.</b> Nitrogen adsorption/desorption isotherms of pristine NEU-6 and $\text{RuP@PNDCN}$ . ....                                          | 32 |
| <b>Figure S27.</b> Nitrogen adsorption/desorption isotherms of pristine NEU-7 and $\text{Fe}_3\text{O}_4/\text{RuO}_2@\text{NEU-7}$ .....            | 33 |
| <b>Figure S28.</b> Nitrogen adsorption/desorption isotherms of pristine NEU-8 and $\text{Ru}_2\text{O}_3/\text{TiN}/\text{TiO}_2@\text{NEU-8}$ ..... | 34 |
| <b>Figure S29.</b> DFT pore analysis of pristine NEU-5 and $\text{Fe}_2\text{P@PNDCN}$ .....                                                         | 35 |
| <b>Figure S30.</b> DFT pore analysis of pristine NEU-6 and $\text{RuP@PNDCN}$ .....                                                                  | 36 |
| <b>Figure S31.</b> DFT pore analysis of pristine NEU-7 and $\text{Fe}_3\text{O}_4/\text{RuO}_2@\text{NEU-7}$ .....                                   | 37 |

|                                                                                                                                                                                                                                                                                                                                             |    |
|---------------------------------------------------------------------------------------------------------------------------------------------------------------------------------------------------------------------------------------------------------------------------------------------------------------------------------------------|----|
| <b>Figure S32.</b> DFT pore analysis of pristine NEU-8 and Ru <sub>2</sub> O/TiN/TiO <sub>2</sub> @NEU-8.....                                                                                                                                                                                                                               | 38 |
| <b>Figure S33.</b> EDX characterization of Fe <sub>2</sub> P@PNDCN.....                                                                                                                                                                                                                                                                     | 39 |
| <b>Figure S34.</b> EDX characterization of Fe <sub>2</sub> P@PNDCN.....                                                                                                                                                                                                                                                                     | 40 |
| <b>Figure S35.</b> EDX characterization of RuP@PNDCN.....                                                                                                                                                                                                                                                                                   | 41 |
| <b>Figure S36.</b> EDX characterization of RuP@PNDCN.....                                                                                                                                                                                                                                                                                   | 42 |
| <b>Figure S37.</b> EDX characterization of Fe <sub>3</sub> O <sub>4</sub> /RuO <sub>2</sub> @NEU-7.....                                                                                                                                                                                                                                     | 43 |
| <b>Figure S38.</b> EDX characterization of Fe <sub>3</sub> O <sub>4</sub> /RuO <sub>2</sub> @NEU-7.....                                                                                                                                                                                                                                     | 44 |
| <b>Figure S39.</b> EDX characterization of Ru <sub>2</sub> O/TiO/TiO <sub>2</sub> @NEU-8.....                                                                                                                                                                                                                                               | 45 |
| <b>Figure S40.</b> EDX characterization of Ru <sub>2</sub> O/TiO/TiO <sub>2</sub> @NEU-8.....                                                                                                                                                                                                                                               | 46 |
| <b>Figure S41.</b> Particle size distribution of Fe <sub>2</sub> P in Fe <sub>2</sub> P@PNDCN.....                                                                                                                                                                                                                                          | 47 |
| <b>Figure S42.</b> Particle size distribution of RuP in RuP@PNDCN.....                                                                                                                                                                                                                                                                      | 48 |
| <b>Figure S43.</b> Particle size distribution of Fe <sub>3</sub> O <sub>4</sub> and RuO <sub>2</sub> in Fe <sub>3</sub> O <sub>4</sub> /RuO <sub>2</sub> @NEU-7.....                                                                                                                                                                        | 49 |
| <b>Figure S44.</b> Particle size distribution of Ru <sub>2</sub> O, TiN and TiO <sub>2</sub> in Ru <sub>2</sub> O/TiN/TiO <sub>2</sub> @NEU-8.....                                                                                                                                                                                          | 50 |
| <b>Figure S45.</b> CVs of Fe <sub>2</sub> P@PNDCN catalyst.....                                                                                                                                                                                                                                                                             | 51 |
| <b>Figure S46.</b> Polarization curves of Fe <sub>2</sub> P@PNDCN initially and after 5000 cyclic voltammetry sweeps. Recorded in O <sub>2</sub> -saturated 0.5 M H <sub>2</sub> SO <sub>4</sub> electrolyte, measured at a scan rate of 50 mV s <sup>-1</sup> . Catalyst loading: 0.8 mg cm <sup>-2</sup> (with iR compensation).....      | 52 |
| <b>Figure S47.</b> (a) XRD, (b) SEM and (c) TEM of Fe <sub>2</sub> P@PNDCN after the stability test in O <sub>2</sub> -saturated 0.5 M H <sub>2</sub> SO <sub>4</sub> electrolyte.....                                                                                                                                                      | 53 |
| <b>Figure S48.</b> Polarization curves of Fe <sub>2</sub> P@PNDCN initially and after 5000 cyclic voltammetry sweeps. Recorded in O <sub>2</sub> -saturated 0.1 M HClO <sub>4</sub> electrolyte, measured at a scan rate of 50 mV s <sup>-1</sup> . Catalyst loading: 0.8 mg cm <sup>-2</sup> (with iR compensation).....                   | 54 |
| <b>Figure S49.</b> (a) XRD, (b) SEM and (c) TEM of Fe <sub>2</sub> P@PNDCN after the stability test in O <sub>2</sub> -saturated 0.1 M HClO <sub>4</sub> electrolyte.....                                                                                                                                                                   | 55 |
| <b>Figure S50.</b> Polarization curves of Fe <sub>2</sub> P@PNDCN initially and after 5000 cyclic voltammetry sweeps. Recorded in O <sub>2</sub> -saturated 1 M KOH electrolyte, measured at a scan rate of 50 mV s <sup>-1</sup> . Catalyst loading: 0.8 mg cm <sup>-2</sup> (with iR compensation).....                                   | 56 |
| <b>Figure S51.</b> (a) XRD, (b) SEM and (c) TEM of Fe <sub>2</sub> P@PNDCN after the stability test in O <sub>2</sub> -saturated 1 M KOH electrolyte.....                                                                                                                                                                                   | 57 |
| <b>Figure S52.</b> Polarization curves of RuP@PNDCN initially and after 5000 cyclic voltammetry sweeps. Recorded in H <sub>2</sub> -saturated 0.5 M H <sub>2</sub> SO <sub>4</sub> electrolyte, measured at a scan rate of 50 mV s <sup>-1</sup> . Catalyst loading: 0.285 mg cm <sup>-2</sup> (with iR compensation).....                  | 58 |
| <b>Figure S53.</b> (a) XRD, (b) SEM and (c) TEM of RuP@PNDCN after the stability test in H <sub>2</sub> -saturated 0.5 M H <sub>2</sub> SO <sub>4</sub> electrolyte.....                                                                                                                                                                    | 59 |
| <b>Figure S54.</b> Polarization curves of RuP@PNDCN initially and after 5000 cyclic voltammetry sweeps. Recorded in H <sub>2</sub> -saturated 1 M KOH electrolyte, measured at a scan rate of 50 mV s <sup>-1</sup> . Catalyst loading: 0.285 mg cm <sup>-2</sup> (with iR compensation).....                                               | 60 |
| <b>Figure S55.</b> (a) XRD, (b) SEM and (c) TEM of RuP@PNDCN after the stability test in H <sub>2</sub> -saturated 1 M KOH electrolyte.....                                                                                                                                                                                                 | 61 |
| <b>Figure S56.</b> LSVs of the Fe <sub>3</sub> O <sub>4</sub> /RuO <sub>2</sub> @NEU-7 catalyst.....                                                                                                                                                                                                                                        | 62 |
| <b>Figure S57.</b> Polarization curves of Fe <sub>3</sub> O <sub>4</sub> /RuO <sub>2</sub> @NEU-7 initially and after 5000 cyclic voltammetry sweeps. Recorded in O <sub>2</sub> -saturated 1 M KOH electrolyte, measured at a scan rate of 50 mV s <sup>-1</sup> . Catalyst loading: 0.255 mg cm <sup>-2</sup> (with iR compensation)..... | 63 |

|                                                                                                                                                                                                                                                                                                                                                                         |    |
|-------------------------------------------------------------------------------------------------------------------------------------------------------------------------------------------------------------------------------------------------------------------------------------------------------------------------------------------------------------------------|----|
| <b>Figure S58.</b> (a) XRD, (b) SEM and (c) TEM of $\text{Fe}_3\text{O}_4/\text{RuO}_2@$ NEU-7 after the stability test in $\text{O}_2$ -saturated 1 M KOH electrolyte.....                                                                                                                                                                                             | 64 |
| <b>Figure S59.</b> Polarization curves of $\text{Ru}_2\text{O}/\text{TiN}/\text{TiO}_2@$ NEU-8 initially and after 5000 cyclic voltammetry sweeps in dark. Recorded in $\text{H}_2$ -saturated 0.5 M $\text{H}_2\text{SO}_4$ electrolyte, measured at a scan rate of $50 \text{ mV s}^{-1}$ . Catalyst loading: $0.285 \text{ mg cm}^{-2}$ (with iR compensation).....  | 65 |
| <b>Figure S60.</b> (a) XRD, (b) SEM and (c) TEM of $\text{Ru}_2\text{O}/\text{TiN}/\text{TiO}_2@$ NEU-8 after the stability test in dark in $\text{H}_2$ -saturated 0.5 M $\text{H}_2\text{SO}_4$ electrolyte.....                                                                                                                                                      | 66 |
| <b>Figure S61.</b> Polarization curves of $\text{Ru}_2\text{O}/\text{TiN}/\text{TiO}_2@$ NEU-8 initially and after 5000 cyclic voltammetry sweeps in light. Recorded in $\text{H}_2$ -saturated 0.5 M $\text{H}_2\text{SO}_4$ electrolyte, measured at a scan rate of $50 \text{ mV s}^{-1}$ . Catalyst loading: $0.285 \text{ mg cm}^{-2}$ (with iR compensation)..... | 67 |
| <b>Figure S62.</b> (a) XRD, (b) SEM and (c) TEM of $\text{Ru}_2\text{O}/\text{TiN}/\text{TiO}_2@$ NEU-8 after the stability test in light in $\text{H}_2$ -saturated 0.5 M $\text{H}_2\text{SO}_4$ electrolyte.....                                                                                                                                                     | 68 |
| <b>Figure S63.</b> UV/Vis spectrum of NEU-8 and $\text{Ru}_2\text{O}/\text{TiN}/\text{TiO}_2@$ NEU-8.....                                                                                                                                                                                                                                                               | 69 |
| <b>Figure S64.</b> Comparison between trends in activities for the ORR, expressed as half-wave potential in acidic electrolyte.....                                                                                                                                                                                                                                     | 70 |
| <b>Figure S65.</b> Comparison between trends in activities for the ORR, expressed as half-wave potential in basic electrolyte.....                                                                                                                                                                                                                                      | 71 |
| <b>Figure S66.</b> Comparison between trends in activities for the HER in acidic electrolyte.....                                                                                                                                                                                                                                                                       | 72 |
| <b>Figure S67.</b> Comparison between trends in activities for the HER in basic electrolyte.....                                                                                                                                                                                                                                                                        | 73 |
| <b>Figure S68.</b> Comparison between trends in activities for the OER in acidic electrolyte.....                                                                                                                                                                                                                                                                       | 74 |
| <b>Figure S69.</b> Comparison between trends in activities for the OER in basic electrolyte.....                                                                                                                                                                                                                                                                        | 75 |
| <b>2. Supplementary Tables</b> .....                                                                                                                                                                                                                                                                                                                                    | 76 |
| <b>Table S1.</b> Summaries of the EXAFS fitting results of the NEU-5 to determine the local molecular structure of zinc within the MOF.....                                                                                                                                                                                                                             | 76 |
| <b>Table S2.</b> Summaries of the EXAFS fitting results of the NEU-5 to determine the local molecular structure of iron within the MOF.....                                                                                                                                                                                                                             | 77 |
| <b>Table S3.</b> BET surface area and total pore volume of NEU-5, NEU-6, NEU-7 and NEU-8, as well as $\text{Fe}_2\text{P}@$ PNDCN, $\text{RuP}@$ PNDCN, $\text{Fe}_3\text{O}_4/\text{RuO}_2@$ NEU-7 and $\text{Ru}_2\text{O}/\text{TiN}/\text{TiO}_2@$ NEU-8.....                                                                                                       | 79 |
| <b>Table S4.</b> Reported catalysts for ORR in acidic electrolyte.....                                                                                                                                                                                                                                                                                                  | 80 |
| <b>Table S5.</b> Reported catalysts for ORR in alkaline electrolyte.....                                                                                                                                                                                                                                                                                                | 82 |
| <b>Table S6.</b> Reported catalysts for HER in acidic electrolyte.....                                                                                                                                                                                                                                                                                                  | 83 |
| <b>Table S7.</b> Reported catalysts for HER in alkaline electrolyte.....                                                                                                                                                                                                                                                                                                | 84 |
| <b>Table S8.</b> Reported catalysts for OER in acidic electrolyte.....                                                                                                                                                                                                                                                                                                  | 85 |
| <b>Table S9.</b> Reported catalysts for OER in alkaline electrolyte.....                                                                                                                                                                                                                                                                                                | 86 |
| <b>3. References</b> .....                                                                                                                                                                                                                                                                                                                                              | 87 |

## 1. Supplementary Figures

**Figure S1.**  $^1\text{H}$  NMR (500 MHz,  $\text{CDCl}_3$ ) spectra of 4'-(2-furyl)-2,2':6',2''-terpyridine:  $\delta = 8.74$  (d,  $J = 4.6$  Hz, 2H), 8.72 (s, 2H), 8.64 (d,  $J = 7.9$  Hz, 2H), 7.90–7.84 (m, 2H), 7.59 (s, 1H), 7.35 (dd,  $J = 6.7, 5.4$  Hz, 2H), 7.12 (d,  $J = 3.3$  Hz, 1H), 6.57 (d,  $J = 1.5$  Hz, 1H) ppm. 4'-(2-furyl)-2,2':6',2''-terpyridine structure is confirmed by  $^1\text{H}$  NMR.

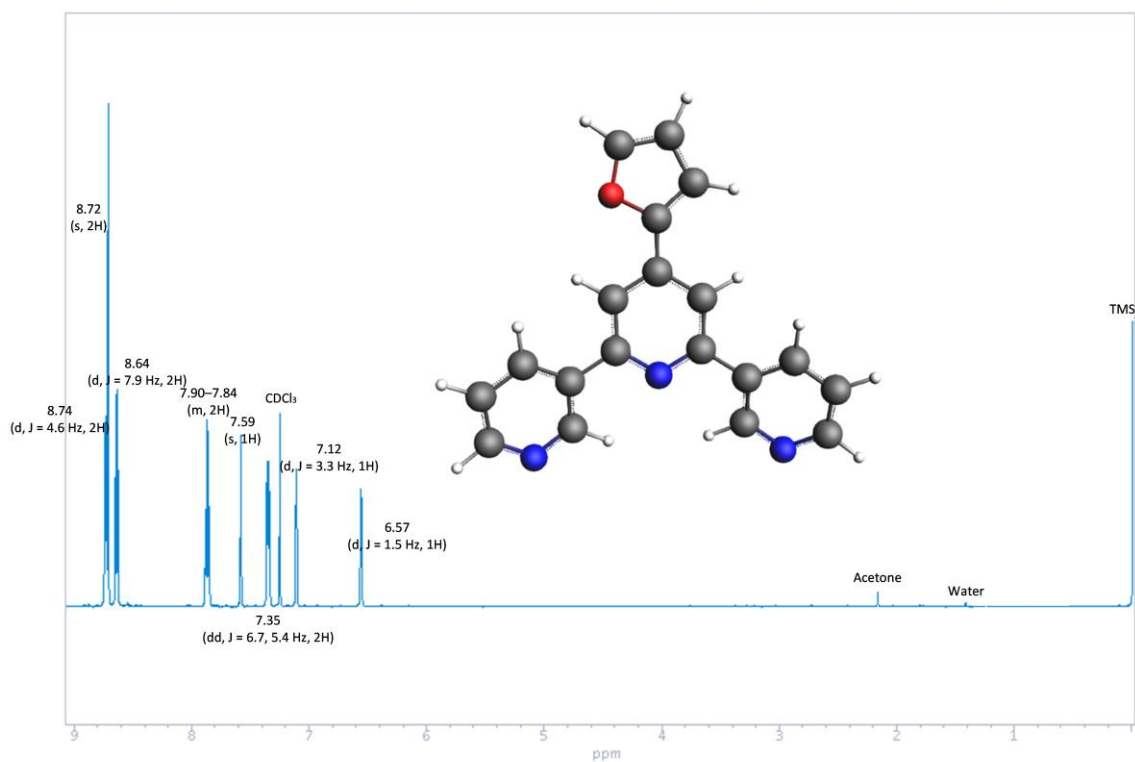

**Figure S2.** DSC of 4'-(2-furyl)-2,2':6',2''-terpyridine. The analysis shows the heat of boiling as well as the boiling temperature of 4'-(2-furyl)-2,2':6',2''-terpyridine. The boiling point depression due to impurities in the sample is zero.

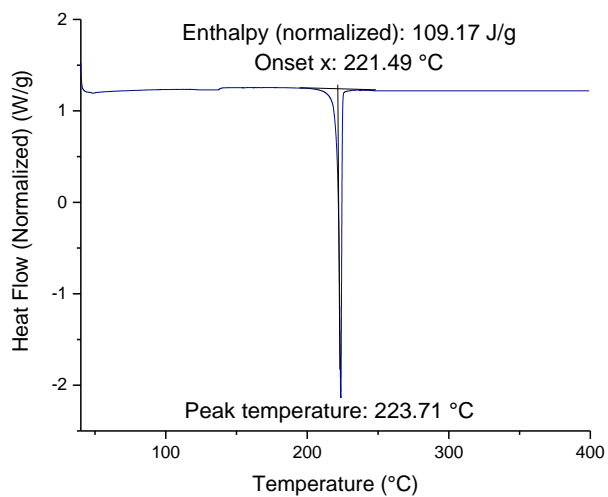

**Figure S3.**  $^1\text{H}$  NMR (500 MHz,  $\text{CD}_3\text{CN}$ ) spectra of  $(\text{FeTpyCOOH})(\text{PF}_6)_2$ :  $\delta = 9.40$  (s, 4 H), 8.68 (d,  $J = 8.1$  Hz, 4 H), 7.90 (dt,  $J = 8.1, 4.6$  Hz, 4 H), 7.08 (2 x d,  $J = 4.6$  Hz, 8 H) ppm.  $(\text{FeTpyCOOH})(\text{PF}_6)_2$  structure is confirmed by  $^1\text{H}$  NMR.

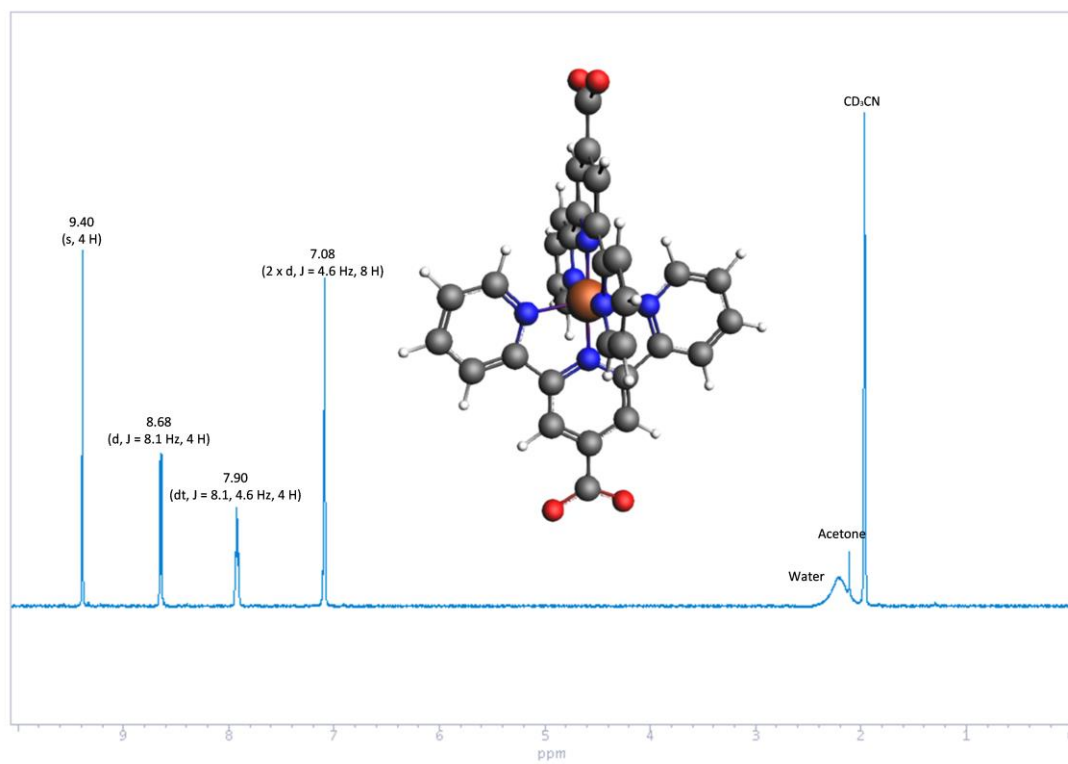

**Figure S4.** DSC of (FeTpyCOOH)(PF<sub>6</sub>)<sub>2</sub>. The analysis shows the heat of boiling as well as the boiling temperature of (FeTpyCOOH)(PF<sub>6</sub>)<sub>2</sub>. The boiling point depression due to impurities in the sample is zero.

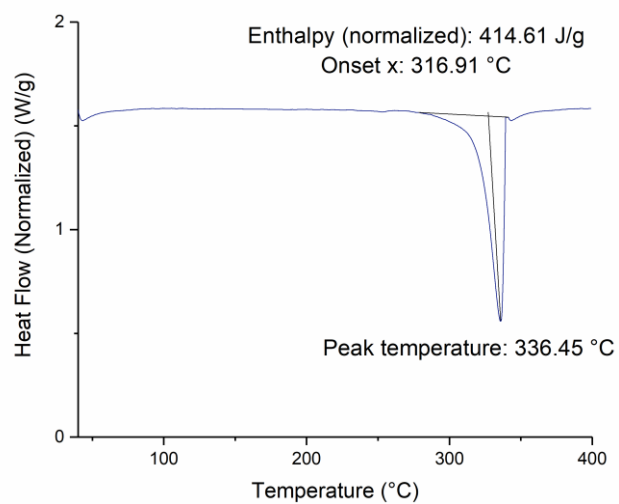



**Figure S5.**  $^1\text{H}$  NMR (500 MHz,  $\text{DMSO-d}_6$ ) spectra of [2,2':6',2''-terpyridine]-4'-carboxylic acid:  $\delta = 8.85$  (s, 2H), 8.75 (d, 2H), 8.64 (d, 2H), 8.03 (td, 2H), 7.53 (dd, 2H) ppm. [2,2':6',2''-terpyridine]-4'-carboxylic acid structure is confirmed by  $^1\text{H}$  NMR.

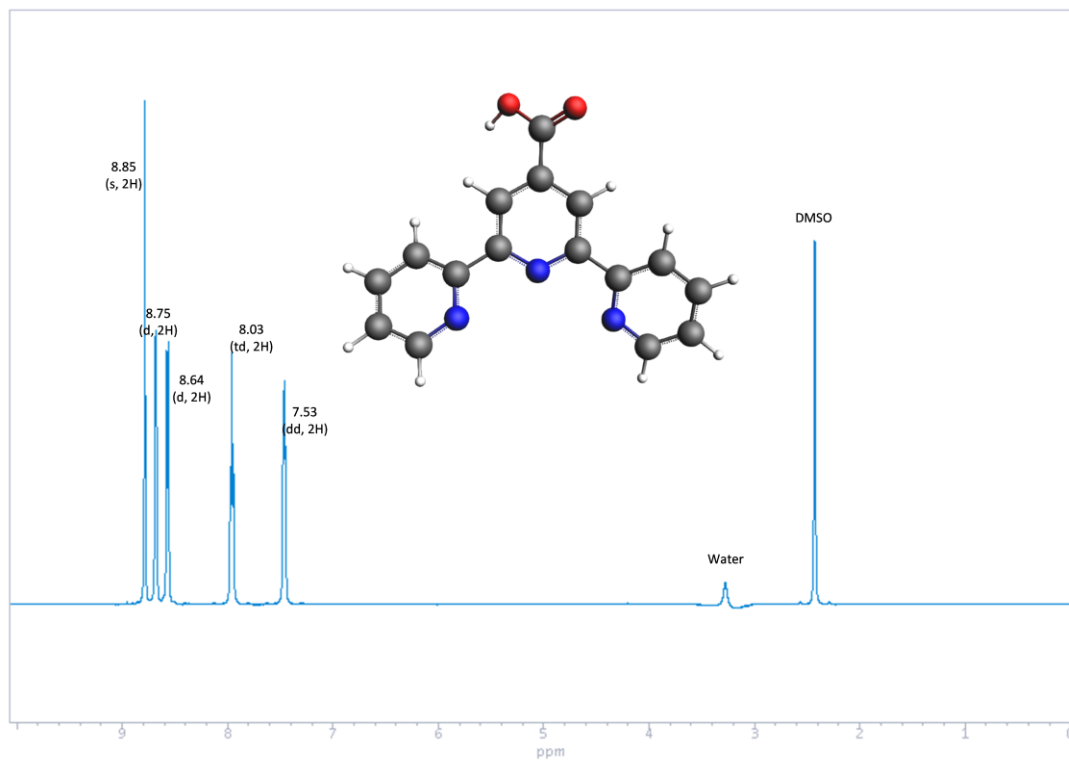

**Figure S6.** DSC of [2,2':6',2''-terpyridine]-4'-carboxylic acid. The analysis shows the heat of boiling as well as the boiling temperature of [2,2':6',2''-terpyridine]-4'-carboxylic acid. The boiling point depression due to impurities in the sample is zero.

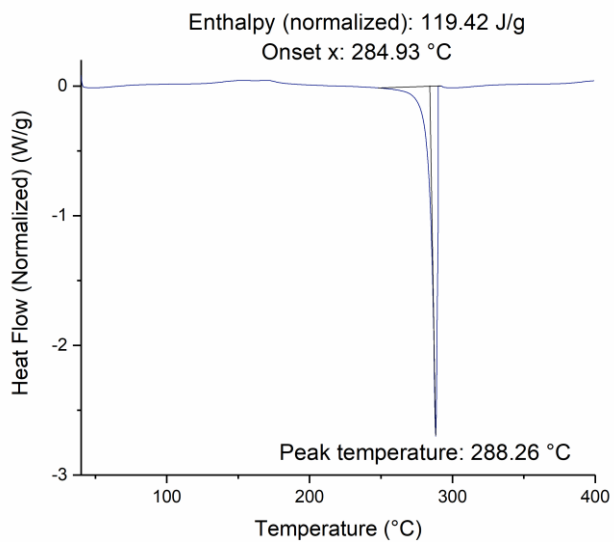

**Figure S7.**  $^1\text{H}$  NMR (500 MHz,  $\text{DMSO-d}_6$ ) spectra of  $(\text{Ru}(\text{terpy}^*)_2)(\text{PF}_6)_2$ :  $\delta$  9.45 (s, 2H), 9.09 (d, 2H), 8.02 (t, 2H), 7.53 (d, 2H), 7.26 (t, 2H) ppm.  $(\text{Ru}(\text{terpy}^*)_2)(\text{PF}_6)_2$  structure is confirmed by  $^1\text{H}$  NMR.

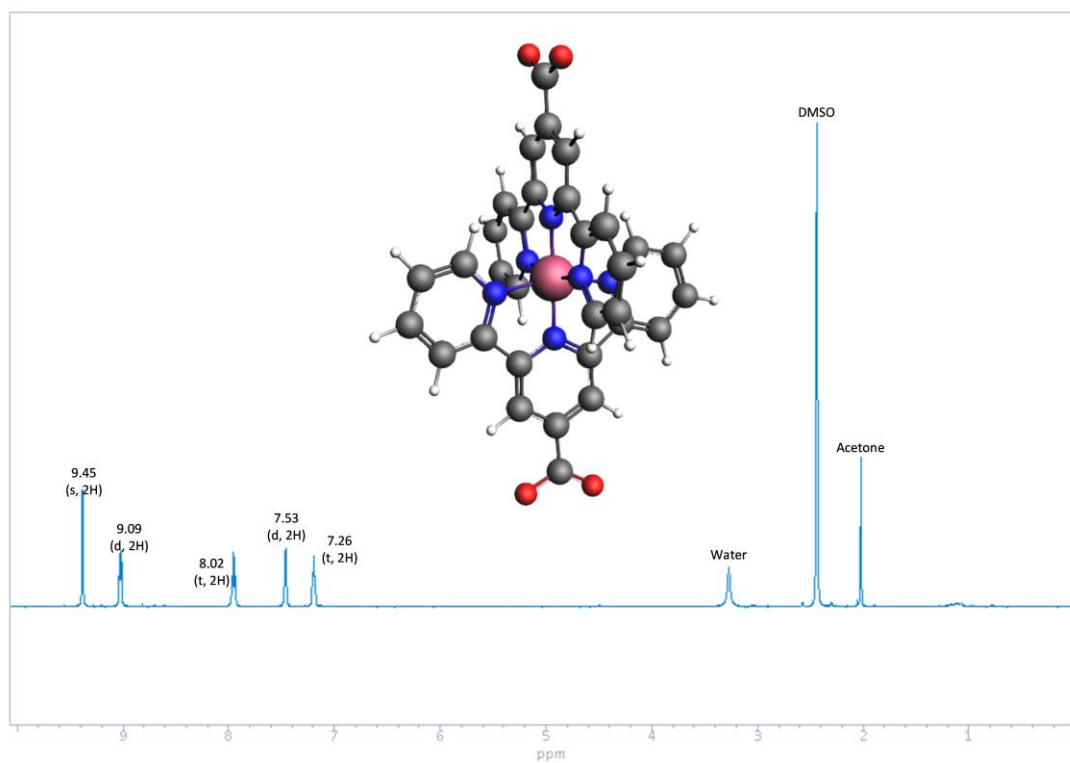

**Figure S8.** DSC of  $(\text{Ru}(\text{terpy}^*)_2)(\text{PF}_6)_2$ . The analysis shows the heat of boiling as well as the boiling temperature of  $(\text{Ru}(\text{terpy}^*)_2)(\text{PF}_6)_2$ . The boiling point depression due to impurities in the sample is zero.

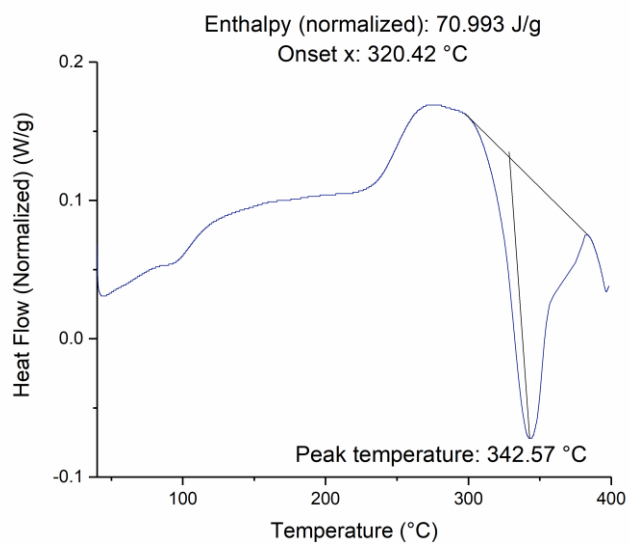

**Figure S9.** Coordinates of each atom in the local molecular structure of zinc within NEU-5.

Atom labelling scheme: C = black; O = red; N = blue; Zn = grey; H = pink.

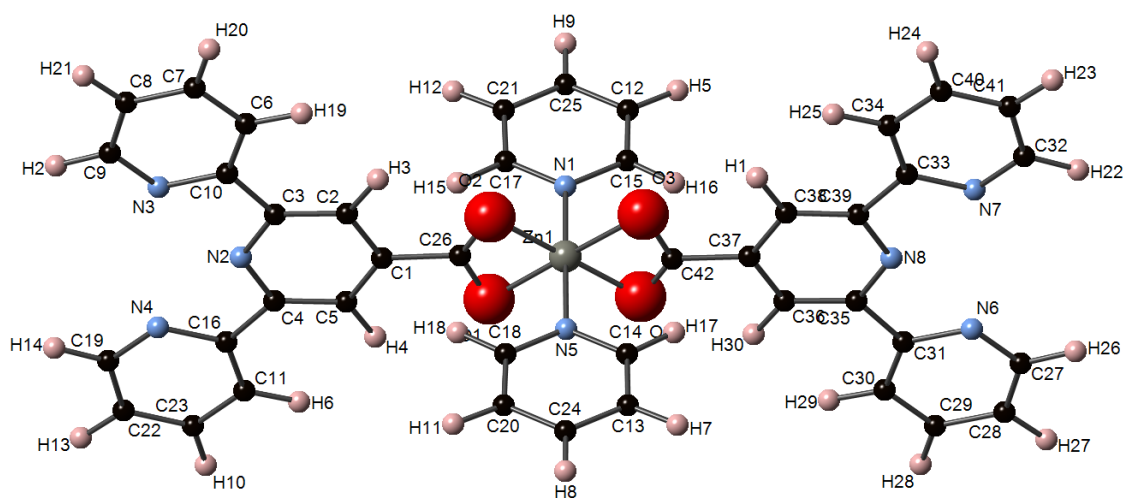

| Label   | Elmt | Fractional Coordinates |        |        | Orthogonal Coordinates |         |         |
|---------|------|------------------------|--------|--------|------------------------|---------|---------|
|         |      | x                      | y      | z      | xor[Å]                 | yor[Å]  | zor[Å]  |
| 1. C1   | C    | 0.4995                 | 0.6194 | 0.4990 | 8.492                  | -18.239 | -8.683  |
| 2. C2   | C    | 0.4286                 | 0.6427 | 0.4989 | 7.287                  | -18.925 | -8.682  |
| 3. C3   | C    | 0.4297                 | 0.6895 | 0.4991 | 7.305                  | -20.303 | -8.685  |
| 4. C4   | C    | 0.5681                 | 0.6898 | 0.4993 | 9.658                  | -20.312 | -8.689  |
| 5. C5   | C    | 0.5702                 | 0.6429 | 0.4992 | 9.694                  | -18.931 | -8.687  |
| 6. C6   | C    | 0.2855                 | 0.7080 | 0.4990 | 4.854                  | -20.848 | -8.683  |
| 7. C7   | C    | 0.2284                 | 0.7414 | 0.4989 | 3.883                  | -21.831 | -8.682  |
| 8. C8   | C    | 0.2514                 | 0.7864 | 0.4986 | 4.274                  | -23.156 | -8.676  |
| 9. C9   | C    | 0.3305                 | 0.7969 | 0.4983 | 5.619                  | -23.466 | -8.671  |
| 10. C10 | C    | 0.3638                 | 0.7205 | 0.4988 | 6.185                  | -21.216 | -8.680  |
| 11. C11 | C    | 0.7120                 | 0.7093 | 0.4995 | 12.105                 | -20.886 | -8.692  |
| 12. C12 | C    | 0.5029                 | 0.4597 | 0.7332 | 8.550                  | -13.536 | -12.759 |
| 13. C13 | C    | 0.5020                 | 0.4597 | 0.2719 | 8.534                  | -13.536 | -4.732  |
| 14. C14 | C    | 0.5019                 | 0.4603 | 0.3513 | 8.533                  | -13.554 | -6.113  |
| 15. C15 | C    | 0.5030                 | 0.4603 | 0.6538 | 8.551                  | -13.554 | -11.377 |
| 16. C16 | C    | 0.6335                 | 0.7212 | 0.4995 | 10.770                 | -21.237 | -8.692  |
| 17. C17 | C    | 0.5023                 | 0.5391 | 0.6527 | 8.540                  | -15.874 | -11.358 |
| 18. C18 | C    | 0.5026                 | 0.5391 | 0.3524 | 8.545                  | -15.874 | -6.132  |
| 19. C19 | C    | 0.6654                 | 0.7979 | 0.5002 | 11.312                 | -23.495 | -8.704  |
| 20. C20 | C    | 0.5028                 | 0.5405 | 0.2731 | 8.548                  | -15.916 | -4.752  |
| 21. C21 | C    | 0.5021                 | 0.5405 | 0.7320 | 8.536                  | -15.916 | -12.738 |
| 22. C22 | C    | 0.7447                 | 0.7879 | 0.5003 | 12.660                 | -23.201 | -8.706  |
| 23. C23 | C    | 0.7685                 | 0.7430 | 0.4999 | 13.065                 | -21.878 | -8.699  |
| 24. C24 | C    | 0.5024                 | 0.5003 | 0.2322 | 8.541                  | -14.732 | -4.041  |
| 25. C25 | C    | 0.5025                 | 0.5003 | 0.7730 | 8.543                  | -14.732 | -13.452 |
| 26. C26 | C    | 0.4951                 | 0.5691 | 0.4988 | 8.417                  | -16.758 | -8.680  |
| 27. C27 | C    | 0.6689                 | 0.2036 | 0.4999 | 11.372                 | -5.995  | -8.699  |
| 28. C28 | C    | 0.7479                 | 0.2144 | 0.5011 | 12.715                 | -6.313  | -8.720  |
| 29. C29 | C    | 0.7703                 | 0.2596 | 0.5018 | 13.096                 | -7.644  | -8.732  |
| 30. C30 | C    | 0.7129                 | 0.2927 | 0.5013 | 12.120                 | -8.619  | -8.723  |
| 31. C31 | C    | 0.6347                 | 0.2799 | 0.5001 | 10.790                 | -8.242  | -8.703  |
| 32. C32 | C    | 0.3340                 | 0.2014 | 0.4964 | 5.678                  | -5.930  | -8.638  |
| 33. C33 | C    | 0.3651                 | 0.2782 | 0.4977 | 6.207                  | -8.192  | -8.661  |
| 34. C34 | C    | 0.2864                 | 0.2898 | 0.4974 | 4.869                  | -8.533  | -8.656  |
| 35. C35 | C    | 0.5685                 | 0.3107 | 0.4996 | 9.665                  | -9.149  | -8.694  |
| 36. C36 | C    | 0.5691                 | 0.3575 | 0.5000 | 9.675                  | -10.527 | -8.701  |
| 37. C37 | C    | 0.4979                 | 0.3805 | 0.4997 | 8.465                  | -11.204 | -8.696  |
| 38. C38 | C    | 0.4275                 | 0.3567 | 0.4989 | 7.268                  | -10.503 | -8.682  |
| 39. C39 | C    | 0.4301                 | 0.3098 | 0.4985 | 7.312                  | -9.122  | -8.675  |
| 40. C40 | C    | 0.2303                 | 0.2559 | 0.4965 | 3.915                  | -7.535  | -8.640  |
| 41. C41 | C    | 0.2545                 | 0.2111 | 0.4959 | 4.327                  | -6.216  | -8.630  |
| 42. C42 | C    | 0.5016                 | 0.4307 | 0.5001 | 8.528                  | -12.682 | -8.703  |
| 43. H1  | H    | 0.3717                 | 0.3753 | 0.4987 | 6.319                  | -11.051 | -8.678  |
| 44. H2  | H    | 0.3509                 | 0.8322 | 0.4980 | 5.966                  | -24.505 | -8.666  |
| 45. H3  | H    | 0.3742                 | 0.6226 | 0.4986 | 6.362                  | -18.333 | -8.676  |
| 46. H4  | H    | 0.6257                 | 0.6241 | 0.4993 | 10.637                 | -18.377 | -8.689  |
| 47. H5  | H    | 0.5032                 | 0.4273 | 0.7640 | 8.555                  | -12.582 | -13.295 |
| 48. H6  | H    | 0.7290                 | 0.6734 | 0.4993 | 12.394                 | -19.829 | -8.689  |
| 49. H7  | H    | 0.5017                 | 0.4273 | 0.2411 | 8.529                  | -12.582 | -4.196  |
| 50. H8  | H    | 0.5025                 | 0.5005 | 0.1692 | 8.543                  | -14.738 | -2.944  |
| 51. H9  | H    | 0.5024                 | 0.5005 | 0.8359 | 8.541                  | -14.738 | -14.546 |

|         |    |        |        |        |        |         |         |
|---------|----|--------|--------|--------|--------|---------|---------|
| 52. H10 | H  | 0.8311 | 0.7342 | 0.5000 | 14.129 | -21.619 | -8.701  |
| 53. H11 | H  | 0.5033 | 0.5734 | 0.2438 | 8.557  | -16.884 | -4.243  |
| 54. H12 | H  | 0.5016 | 0.5734 | 0.7614 | 8.528  | -16.884 | -13.250 |
| 55. H13 | H  | 0.7877 | 0.8156 | 0.5008 | 13.392 | -24.016 | -8.715  |
| 56. H14 | H  | 0.6443 | 0.8330 | 0.5004 | 10.954 | -24.529 | -8.708  |
| 57. H15 | H  | 0.5020 | 0.5703 | 0.6184 | 8.534  | -16.793 | -10.761 |
| 58. H16 | H  | 0.5020 | 0.4298 | 0.6184 | 8.534  | -12.656 | -10.761 |
| 59. H17 | H  | 0.5029 | 0.4298 | 0.3867 | 8.550  | -12.656 | -6.729  |
| 60. H18 | H  | 0.5029 | 0.5703 | 0.3867 | 8.550  | -16.793 | -6.729  |
| 61. H19 | H  | 0.2693 | 0.6720 | 0.4992 | 4.578  | -19.788 | -8.687  |
| 62. H20 | H  | 0.1660 | 0.7322 | 0.4990 | 2.822  | -21.560 | -8.683  |
| 63. H21 | H  | 0.2079 | 0.8139 | 0.4985 | 3.534  | -23.966 | -8.675  |
| 64. H22 | H  | 0.3554 | 0.1663 | 0.4960 | 6.042  | -4.897  | -8.631  |
| 65. H23 | H  | 0.2119 | 0.1832 | 0.4951 | 3.602  | -5.395  | -8.616  |
| 66. H24 | H  | 0.1676 | 0.2645 | 0.4962 | 2.849  | -7.788  | -8.635  |
| 67. H25 | H  | 0.2690 | 0.3256 | 0.4979 | 4.573  | -9.588  | -8.664  |
| 68. H26 | H  | 0.6488 | 0.1683 | 0.4994 | 11.030 | -4.956  | -8.690  |
| 69. H27 | H  | 0.7916 | 0.1871 | 0.5015 | 13.458 | -5.509  | -8.727  |
| 70. H28 | H  | 0.8327 | 0.2689 | 0.5028 | 14.157 | -7.918  | -8.750  |
| 71. H29 | H  | 0.7287 | 0.3288 | 0.5018 | 12.388 | -9.682  | -8.732  |
| 72. H30 | H  | 0.6232 | 0.3778 | 0.5007 | 10.595 | -11.125 | -8.713  |
| 73. N1  | N  | 0.4991 | 0.5004 | 0.6104 | 8.485  | -14.735 | -10.622 |
| 74. N2  | N  | 0.4988 | 0.7118 | 0.4993 | 8.480  | -20.960 | -8.689  |
| 75. N3  | N  | 0.3857 | 0.7648 | 0.4983 | 6.557  | -22.520 | -8.671  |
| 76. N4  | N  | 0.6108 | 0.7654 | 0.4996 | 10.384 | -22.538 | -8.694  |
| 77. N5  | N  | 0.5020 | 0.5000 | 0.3909 | 8.534  | -14.723 | -6.802  |
| 78. N6  | N  | 0.6133 | 0.2356 | 0.4994 | 10.427 | -6.938  | -8.690  |
| 79. N7  | N  | 0.3883 | 0.2341 | 0.4973 | 6.601  | -6.893  | -8.654  |
| 80. N8  | N  | 0.4997 | 0.2881 | 0.4988 | 8.495  | -8.483  | -8.680  |
| 81. O1  | O  | 0.5660 | 0.5502 | 0.4995 | 9.622  | -16.201 | -8.692  |
| 82. O2  | O  | 0.4333 | 0.5492 | 0.4982 | 7.366  | -16.172 | -8.670  |
| 83. O3  | O  | 0.4304 | 0.4494 | 0.4995 | 7.317  | -13.233 | -8.692  |
| 84. O4  | O  | 0.5631 | 0.4510 | 0.5008 | 9.573  | -13.280 | -8.715  |
| 85. Zn1 | Zn | 0.4993 | 0.5004 | 0.5012 | 8.488  | -14.735 | -8.722  |

**Figure S10.** X-ray absorption spectrum at the Zn K-edge of the NEU-5 before (a) and after normalization (b).

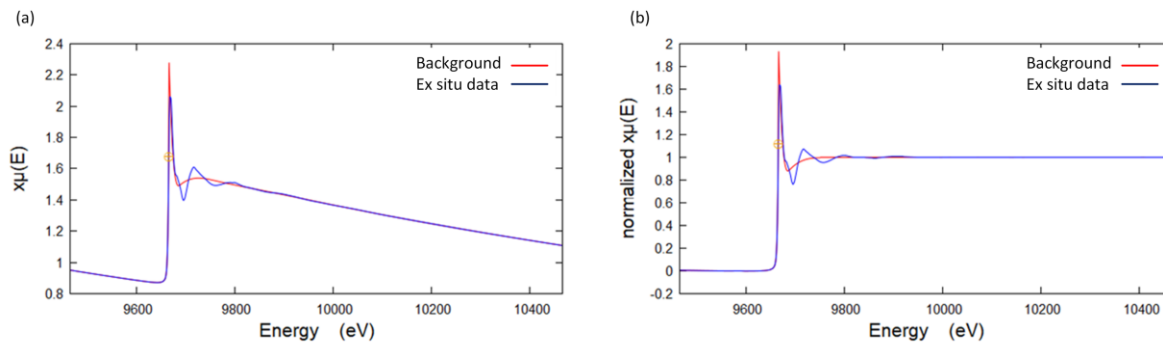

**Figure S11.** Coordinates of each atom in the local molecular structure of iron within NEU-5.

Atom labelling scheme: C = black; O = red; N = blue; Fe = brown; H = pink.

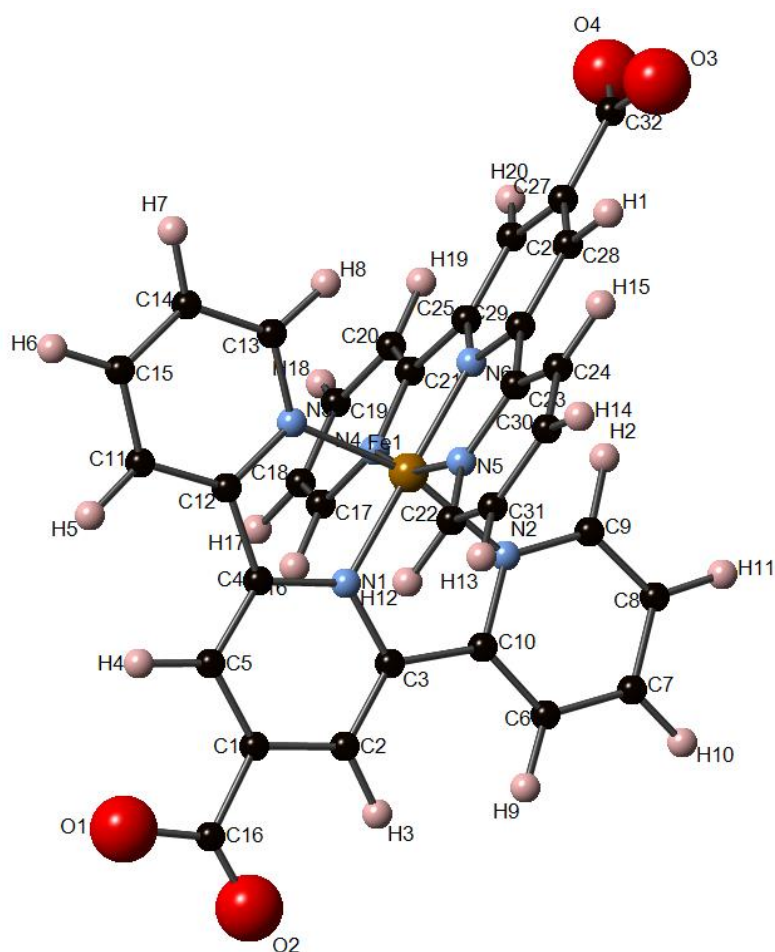

| Label   | Elmt | Fractional Coordinates |        |        | Orthogonal Coordinates |         |        |
|---------|------|------------------------|--------|--------|------------------------|---------|--------|
|         |      | x                      | y      | z      | xor[Å]                 | yor[Å]  | zor[Å] |
| 1. C1   | C    | 0.5007                 | 0.7007 | 0.4983 | -11.609                | -9.889  | 12.876 |
| 2. C2   | C    | 0.4296                 | 0.6707 | 0.4984 | -10.307                | -9.900  | 12.400 |
| 3. C3   | C    | 0.4307                 | 0.6102 | 0.4983 | -9.661                 | -8.697  | 12.208 |
| 4. C4   | C    | 0.5695                 | 0.6097 | 0.4980 | -11.557                | -7.512  | 12.944 |
| 5. C5   | C    | 0.5715                 | 0.6704 | 0.4981 | -12.248                | -8.692  | 13.153 |
| 6. C6   | C    | 0.2862                 | 0.5862 | 0.4984 | -7.420                 | -9.447  | 11.360 |
| 7. C7   | C    | 0.2290                 | 0.5431 | 0.4985 | -6.165                 | -9.082  | 10.916 |
| 8. C8   | C    | 0.2520                 | 0.4848 | 0.4988 | -5.841                 | -7.737  | 10.855 |
| 9. C9   | C    | 0.3313                 | 0.4713 | 0.4991 | -6.777                 | -6.800  | 11.240 |
| 10. C10 | C    | 0.3647                 | 0.5701 | 0.4986 | -8.317                 | -8.465  | 11.731 |
| 11. C11 | C    | 0.7137                 | 0.5846 | 0.4978 | -13.258                | -5.796  | 13.631 |
| 12. C12 | C    | 0.6350                 | 0.5691 | 0.4979 | -12.011                | -6.157  | 13.162 |
| 13. C13 | C    | 0.6670                 | 0.4701 | 0.4972 | -11.371                | -3.933  | 13.001 |
| 14. C14 | C    | 0.7465                 | 0.4829 | 0.4970 | -12.600                | -3.512  | 13.464 |
| 15. C15 | C    | 0.7703                 | 0.5410 | 0.4974 | -13.559                | -4.457  | 13.786 |
| 16. C16 | C    | 0.4963                 | 0.7657 | 0.4985 | -12.258                | -11.209 | 13.066 |
| 17. C17 | C    | 0.4975                 | 0.5279 | 0.3305 | -10.654                | -6.404  | 9.629  |
| 18. C18 | C    | 0.4963                 | 0.5140 | 0.2513 | -10.948                | -6.091  | 8.317  |
| 19. C19 | C    | 0.4956                 | 0.4556 | 0.2288 | -10.431                | -4.931  | 7.766  |
| 20. C20 | C    | 0.4961                 | 0.4127 | 0.2864 | -9.633                 | -4.117  | 8.547  |
| 21. C21 | C    | 0.4974                 | 0.4292 | 0.3647 | -9.375                 | -4.480  | 9.853  |
| 22. C22 | C    | 0.5012                 | 0.5307 | 0.6662 | -8.778                 | -6.636  | 15.000 |
| 23. C23 | C    | 0.4998                 | 0.4315 | 0.6350 | -7.856                 | -4.673  | 14.175 |
| 24. C24 | C    | 0.5001                 | 0.4164 | 0.7139 | -7.235                 | -4.421  | 15.383 |
| 25. C25 | C    | 0.4978                 | 0.3895 | 0.4311 | -8.559                 | -3.735  | 10.783 |
| 26. C26 | C    | 0.4974                 | 0.3290 | 0.4305 | -7.895                 | -2.544  | 10.576 |
| 27. C27 | C    | 0.4978                 | 0.2993 | 0.5019 | -7.160                 | -2.000  | 11.618 |
| 28. C28 | C    | 0.4986                 | 0.3300 | 0.5725 | -7.095                 | -2.642  | 12.845 |
| 29. C29 | C    | 0.4989                 | 0.3906 | 0.5699 | -7.776                 | -3.833  | 13.002 |
| 30. C30 | C    | 0.5011                 | 0.4603 | 0.7701 | -7.401                 | -5.313  | 16.425 |



|         |    |        |        |        |         |         |        |
|---------|----|--------|--------|--------|---------|---------|--------|
| 31. C31 | C  | 0.5016 | 0.5182 | 0.7458 | -8.182  | -6.436  | 16.228 |
| 32. C32 | C  | 0.4974 | 0.2343 | 0.4982 | -6.465  | -0.719  | 11.347 |
| 33. Fe1 | Fe | 0.4994 | 0.5000 | 0.4987 | -9.394  | -5.942  | 12.225 |
| 34. H1  | H  | 0.4988 | 0.3060 | 0.6284 | -6.509  | -2.202  | 13.658 |
| 35. H2  | H  | 0.3517 | 0.4257 | 0.4994 | -6.556  | -5.728  | 11.206 |
| 36. H3  | H  | 0.3751 | 0.6966 | 0.4987 | -9.842  | -10.872 | 12.197 |
| 37. H4  | H  | 0.6272 | 0.6947 | 0.4980 | -13.277 | -8.700  | 13.528 |
| 38. H5  | H  | 0.7307 | 0.6309 | 0.4981 | -13.995 | -6.565  | 13.877 |
| 39. H6  | H  | 0.8331 | 0.5524 | 0.4973 | -14.544 | -4.150  | 14.157 |
| 40. H7  | H  | 0.7895 | 0.4471 | 0.4965 | -12.800 | -2.442  | 13.570 |
| 41. H8  | H  | 0.6458 | 0.4246 | 0.4969 | -10.585 | -3.215  | 12.736 |
| 42. H9  | H  | 0.2699 | 0.6327 | 0.4981 | -7.707  | -10.502 | 11.418 |
| 43. H10 | H  | 0.1664 | 0.5549 | 0.4983 | -5.438  | -9.844  | 10.616 |
| 44. H11 | H  | 0.2084 | 0.4494 | 0.4988 | -4.857  | -7.408  | 10.507 |
| 45. H12 | H  | 0.5015 | 0.5761 | 0.6447 | -9.404  | -7.516  | 14.806 |
| 46. H13 | H  | 0.5024 | 0.5542 | 0.7886 | -8.337  | -7.166  | 17.030 |
| 47. H14 | H  | 0.5014 | 0.4492 | 0.8330 | -6.917  | -5.131  | 17.392 |
| 48. H15 | H  | 0.4996 | 0.3702 | 0.7313 | -6.622  | -3.525  | 15.508 |
| 49. H16 | H  | 0.4981 | 0.5736 | 0.3506 | -11.045 | -7.313  | 10.100 |
| 50. H17 | H  | 0.4959 | 0.5492 | 0.2074 | -11.583 | -6.762  | 7.730  |
| 51. H18 | H  | 0.4946 | 0.4435 | 0.1663 | -10.650 | -4.662  | 6.727  |
| 52. H19 | H  | 0.4956 | 0.3661 | 0.2705 | -9.209  | -3.192  | 8.140  |
| 53. H20 | H  | 0.4967 | 0.3027 | 0.3763 | -7.914  | -1.998  | 9.624  |
| 54. N1  | N  | 0.5000 | 0.5813 | 0.4980 | -10.295 | -7.540  | 12.481 |
| 55. N2  | N  | 0.3866 | 0.5128 | 0.4991 | -7.988  | -7.150  | 11.670 |
| 56. N3  | N  | 0.6122 | 0.5120 | 0.4977 | -11.076 | -5.223  | 12.852 |
| 57. N4  | N  | 0.4981 | 0.4866 | 0.3862 | -9.886  | -5.619  | 10.385 |
| 58. N5  | N  | 0.5002 | 0.4885 | 0.6118 | -8.620  | -5.779  | 13.992 |
| 59. N6  | N  | 0.4987 | 0.4187 | 0.5001 | -8.488  | -4.346  | 11.981 |
| 60. O1  | O  | 0.5674 | 0.7902 | 0.4978 | -13.503 | -11.089 | 13.514 |
| 61. O2  | O  | 0.4343 | 0.7915 | 0.4992 | -11.687 | -12.243 | 12.829 |
| 62. O3  | O  | 0.4980 | 0.2103 | 0.5696 | -5.795  | -0.285  | 12.408 |
| 63. O4  | O  | 0.4966 | 0.2082 | 0.4365 | -6.529  | -0.173  | 10.276 |

**Figure S12.** X-ray absorption spectrum at the Fe K-edge of the NEU-5 before (a) and after normalization (b).

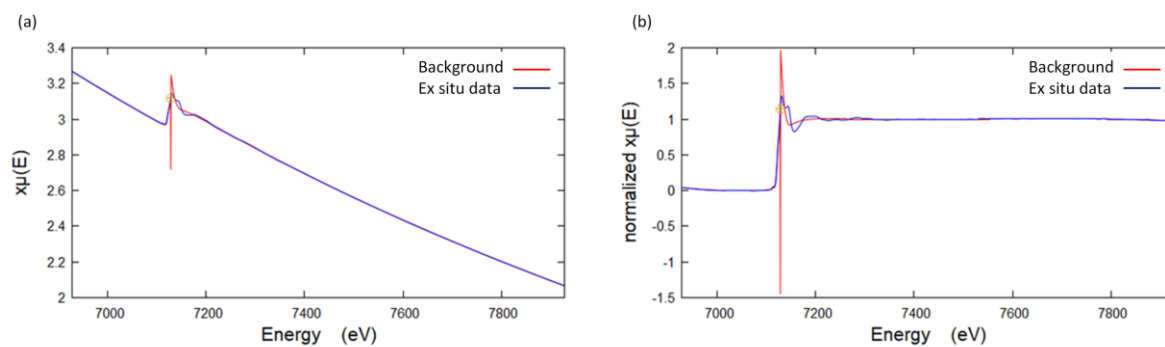

**Figure S13.** EDX characterization of NEU-5. It shows the presence of zinc (~5 %w) and iron (~3 %w) within the sample, as well as that of carbon (~47 %w), nitrogen (~4 %w), oxygen (~12 %w), fluorine (~21 %w), and phosphorus (~8 %w). Weight content was determined in different zones and the average was calculated.

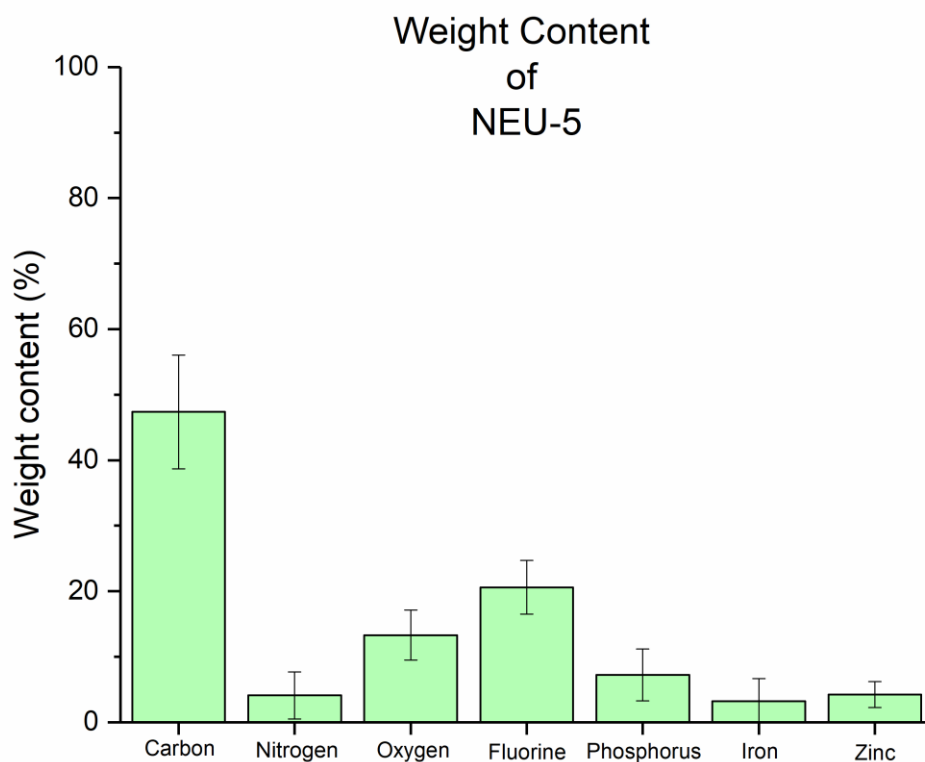

**Figure S14.** EDX characterization of NEU-5. It shows the presence of zinc (~2 %m) and iron (~2 %m) within the sample, as well as that of carbon (~60 %m), nitrogen (~4 %m), oxygen (~13 %m), fluorine (~16 %m), and phosphorus (~3 %m). Atomic content was determined in different zones and the average was calculated.

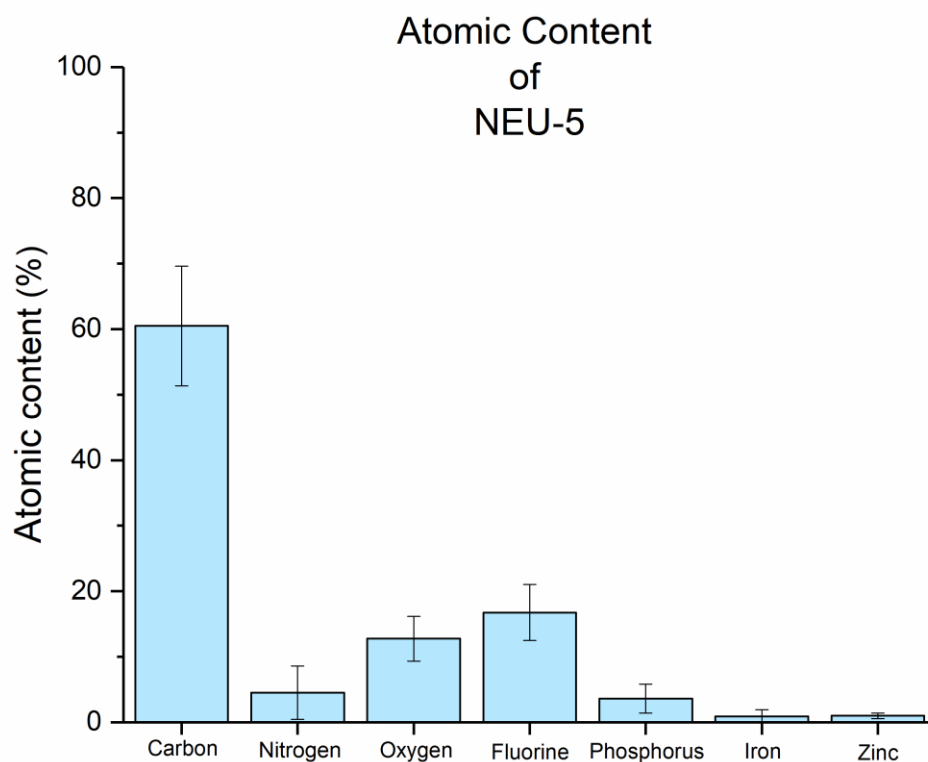

**Figure S15.** EDX characterization of NEU-6. It shows the presence of zinc (~9 %w) and ruthenium (~8 %w) within the sample, as well as that of carbon (~49 %w), nitrogen (~4 %w), oxygen (~8 %w), fluorine (~11 %w), and phosphorus (~11 %w). Weight content was determined in different zones and the average was calculated.

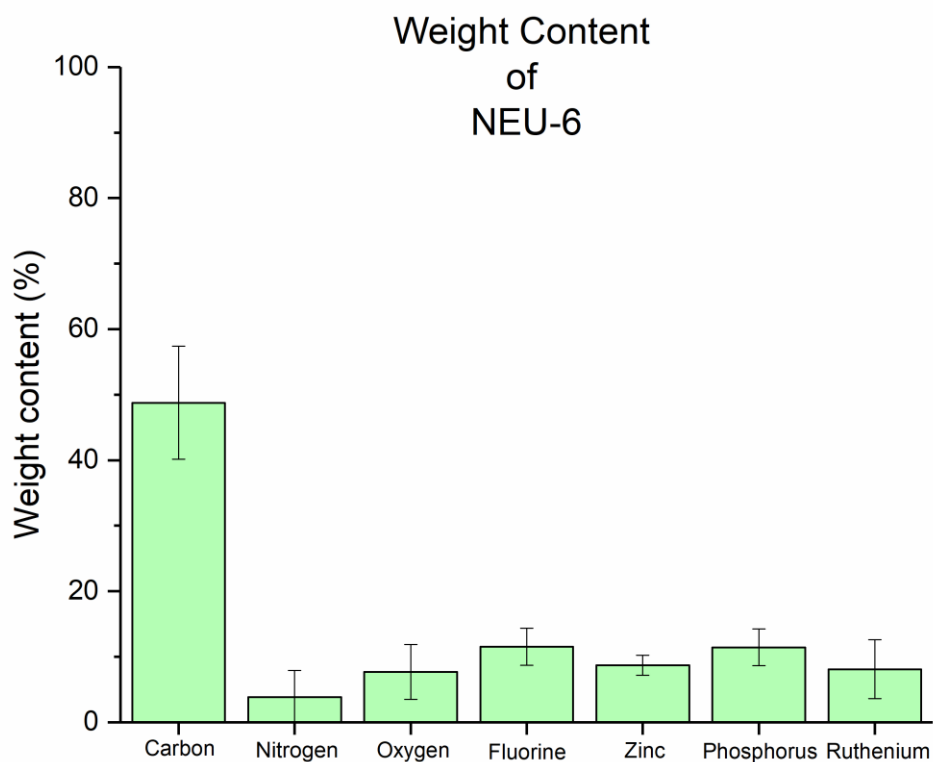

**Figure S16.** EDX characterization of NEU-6. It shows the presence of zinc (~2 %m) and ruthenium (~2 %m) within the sample, as well as that of carbon (~68 %m), nitrogen (~4 %m), oxygen (~8 %m), fluorine (~10 %m), and phosphorus (~6 %m). Atomic content was determined in different zones and the average was calculated.

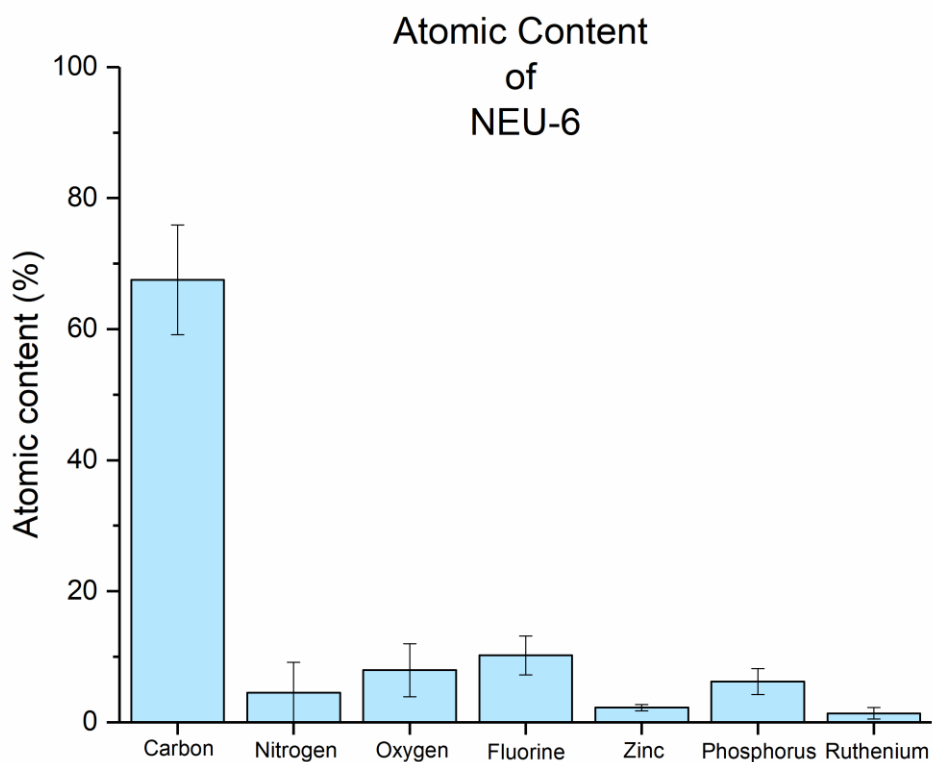

**Figure S17.** EDX characterization of NEU-7. It shows the presence of iron (~18 %w) and ruthenium (~2 %w) within the sample, as well as that of carbon (~28 %w), nitrogen (~3 %w), oxygen (~32 %w), fluorine (~7 %w), and phosphorus (~10 %w). Weight content was determined in different zones and the average was calculated.

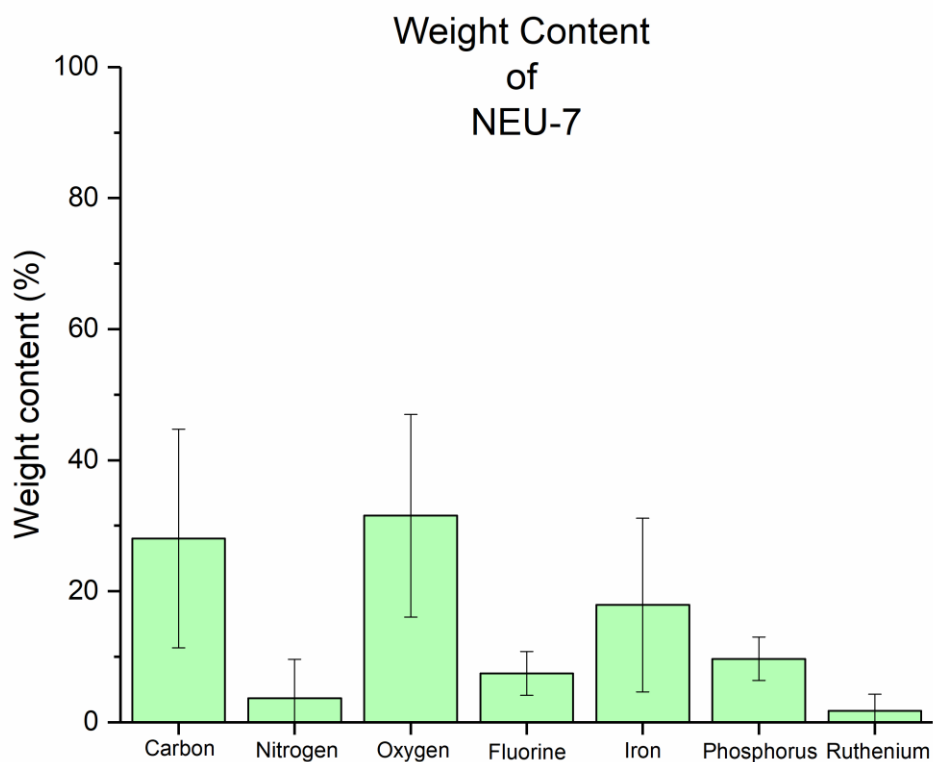

**Figure S18.** EDX characterization of NEU-7. It shows the presence of iron (~7 %m) and ruthenium (~1 %m) within the sample, as well as that of carbon (~40 %m), nitrogen (~4 %m), oxygen (~35 %m), fluorine (~7 %m), and phosphorus (~6 %m). Atomic content was determined in different zones and the average was calculated.

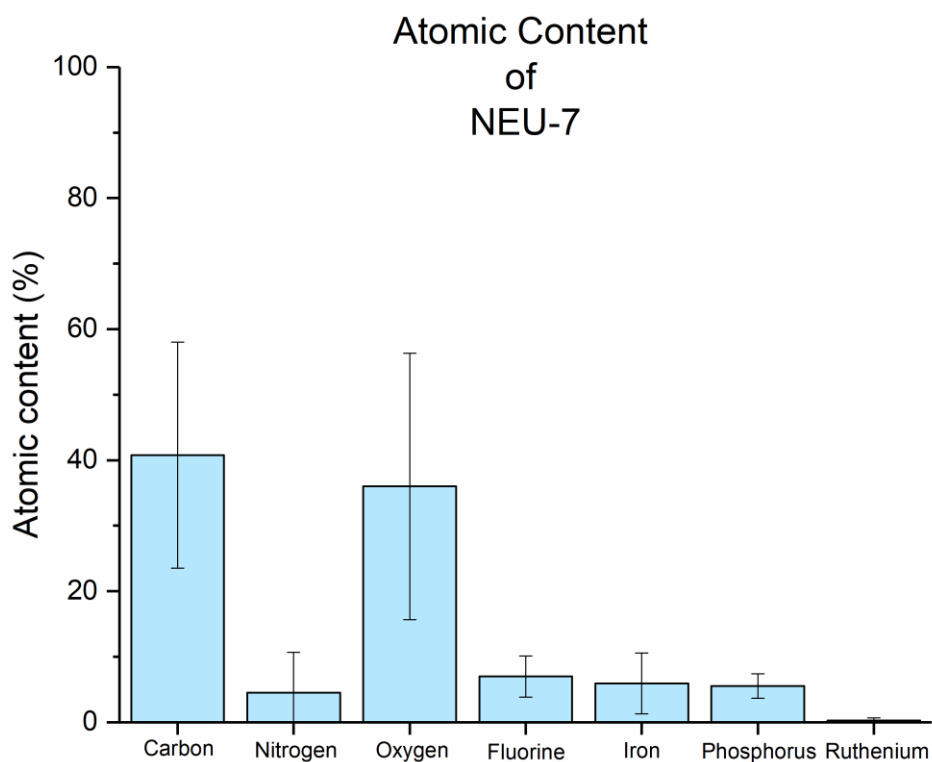



**Figure S19.** EDX characterization of NEU-8. It shows the presence of titanium (~7 %w) and ruthenium (~9 %w) within the sample, as well as that of carbon (~45 %w), nitrogen (~5 %w), oxygen (~11 %w), fluorine (~12 %w), phosphorus (~11 %w). Weight content was determined in different zones and the average was calculated.

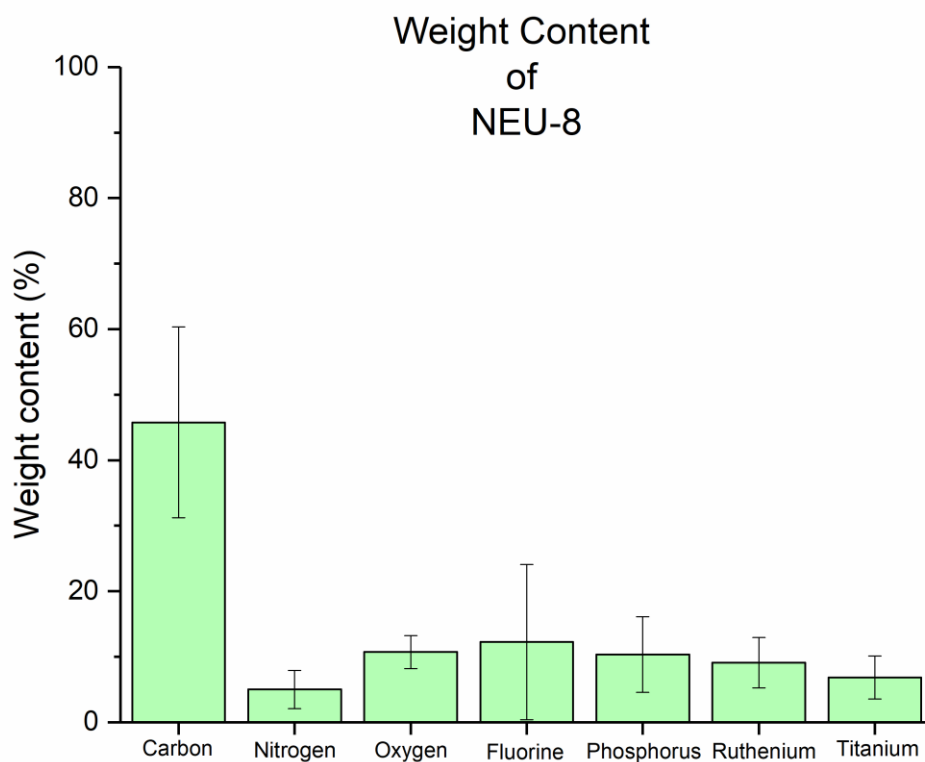

**Figure S20.** EDX characterization of NEU-8. It shows the presence of titanium (~3 %m) and ruthenium (~2 %m) within the sample, as well as that of carbon (~62 %m), nitrogen (~5 %m), oxygen (~11 %m), fluorine (~11 %m), and phosphorus (~6 %m). Atomic content was determined in different zones and the average was calculated.

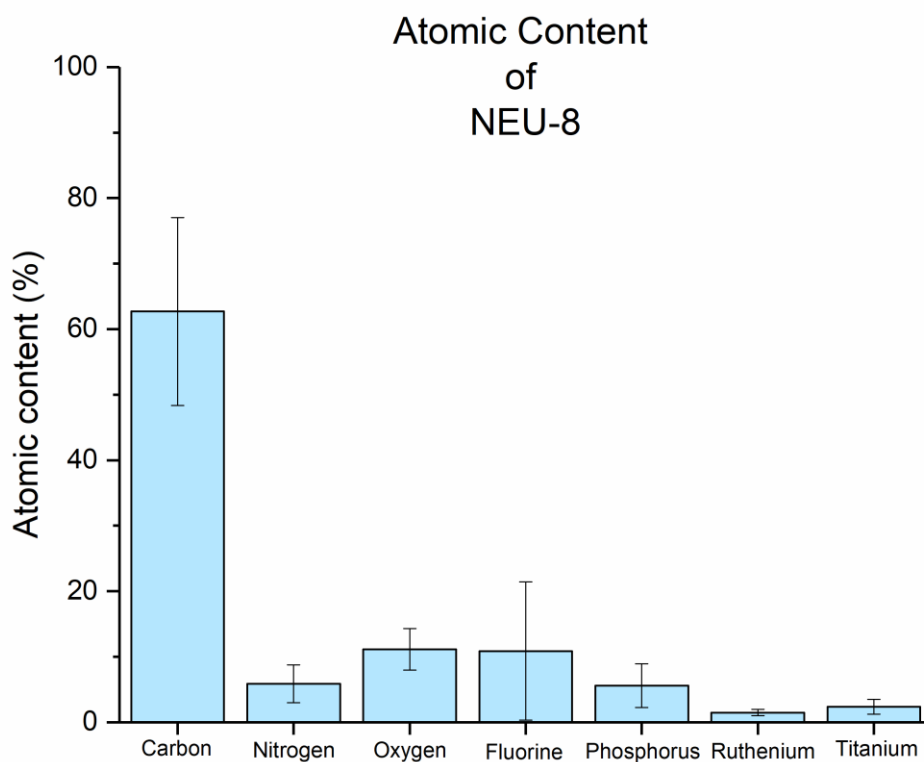

**Figure S21.** TGA of NEU-5 from room temperature to 1000 °C at a rate of 5 °C min<sup>-1</sup> under a nitrogen flow. NEU-5 showed a total mass loss of ~49.42 wt% on heating up to 1000 °C. The mass loss occurred in three steps: (1) mass loss of ~4.42 wt% at ~250 °C due to the desorption of trapped moisture, (2) mass loss of ~30.85 wt% on heating up to ~475 °C due to the decomposition of ligated pyridine in axial position, (3) mass loss of ~14.18 wt% on heating up to 800 °C due to the decomposition of the remaining nitrogen-carbon-hydrogen structure.

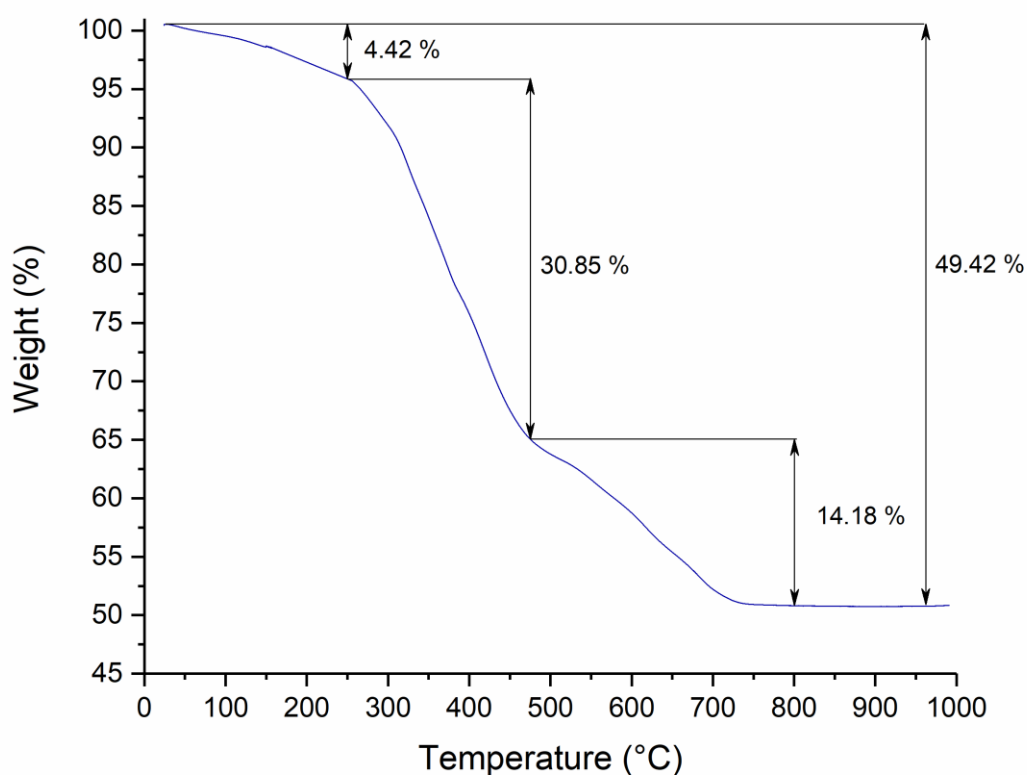

**Figure S22.** TGA of NEU-6 from room temperature to 1000 °C at a rate of 5 °C min<sup>-1</sup> under a nitrogen flow. NEU-6 showed a total mass loss of ~54.76 wt% on heating up to 1000 °C. The mass loss occurred in three steps: (1) mass loss of ~3.12 wt% at ~150 °C due to the desorption of trapped moisture, (2) mass loss of ~17.07 wt% on heating up to ~350 °C due to the decomposition of ligated pyridine in axial position, (3) mass loss of ~34.15 wt% on heating up to 600 °C due to the decomposition of the remaining nitrogen-carbon-hydrogen structure.

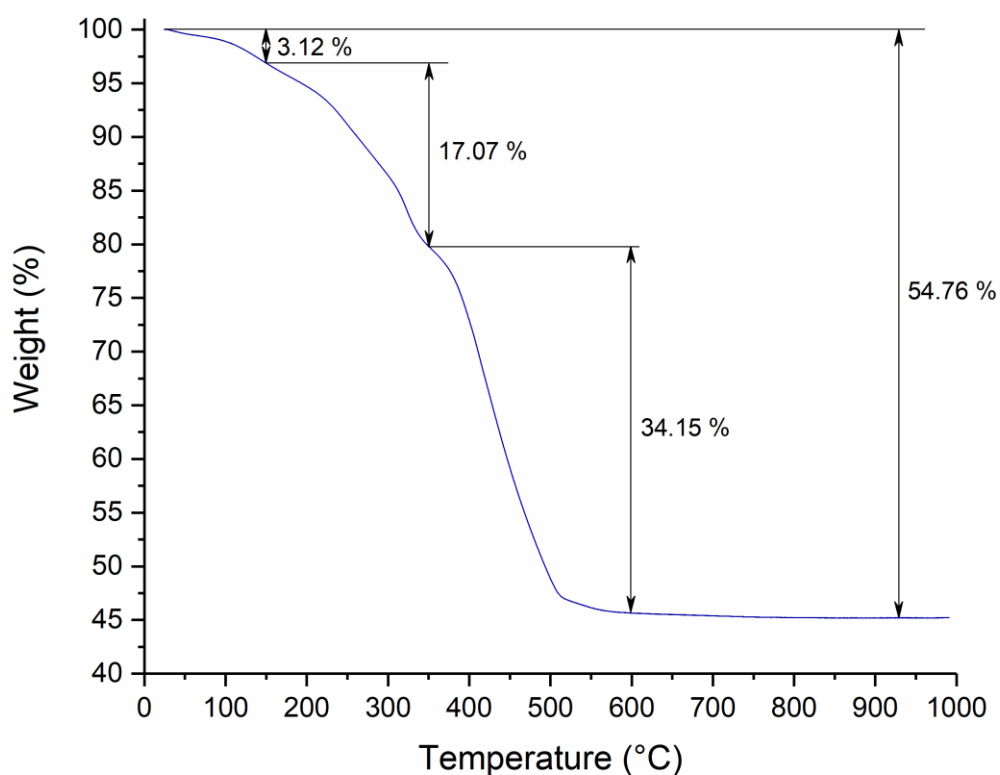

**Figure S23.** TGA of NEU-7 from room temperature to 1000 °C at a rate of 5 °C min<sup>-1</sup> under a nitrogen flow. NEU-7 showed a total mass loss of ~29.57 wt% on heating up to 1000 °C. The mass loss occurred in three steps: (1) mass loss of ~2.06 wt% at ~150 °C due to the desorption of trapped moisture, (2) mass loss of ~5.64 wt% on heating up to ~275 °C due to the decomposition of ligated pyridine in axial position, (3) mass loss of ~21.34 wt% on heating up to 600 °C due to the decomposition of the remaining nitrogen-carbon-hydrogen structure.

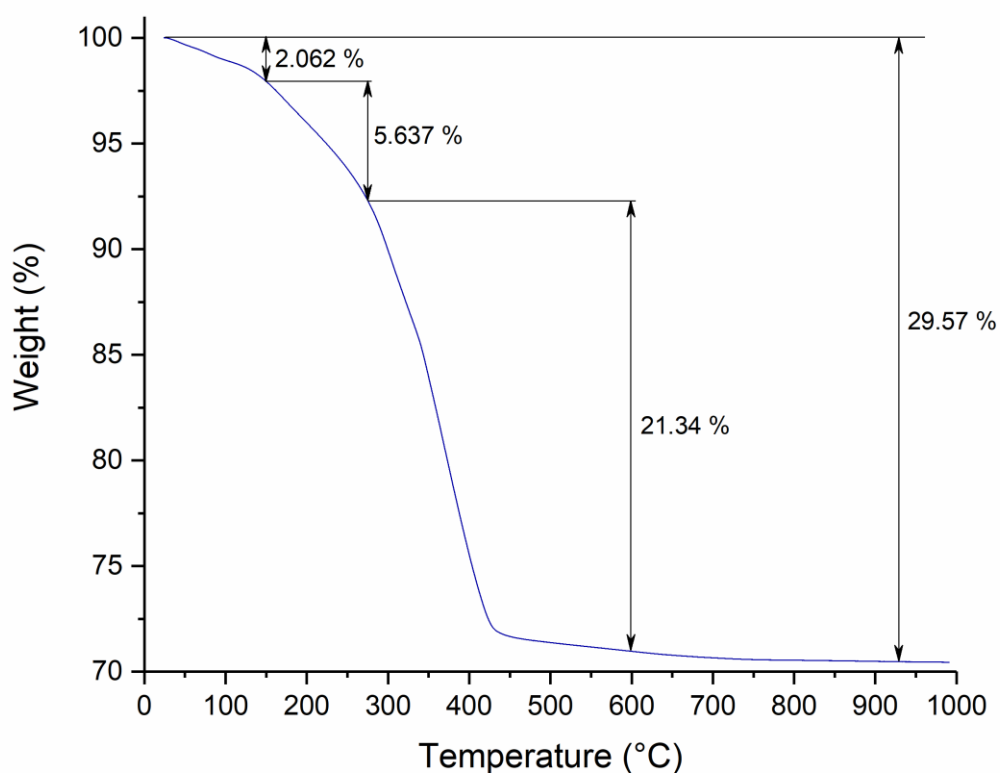

**Figure S24.** TGA of NEU-8 from room temperature to 1000 °C at a rate of 5 °C min<sup>-1</sup> under a nitrogen flow. NEU-8 showed a total mass loss of ~65.20 wt% on heating up to 1000 °C. The mass loss occurred in three steps: (1) mass loss of ~6.70 wt% at ~150 °C due to the desorption of trapped moisture, (2) mass loss of ~9.15 wt% on heating up to ~300 °C due to the decomposition of ligated pyridine in axial position, (3) mass loss of ~48.83 wt% on heating up to 600 °C due to the decomposition of the remaining nitrogen-carbon-hydrogen structure.

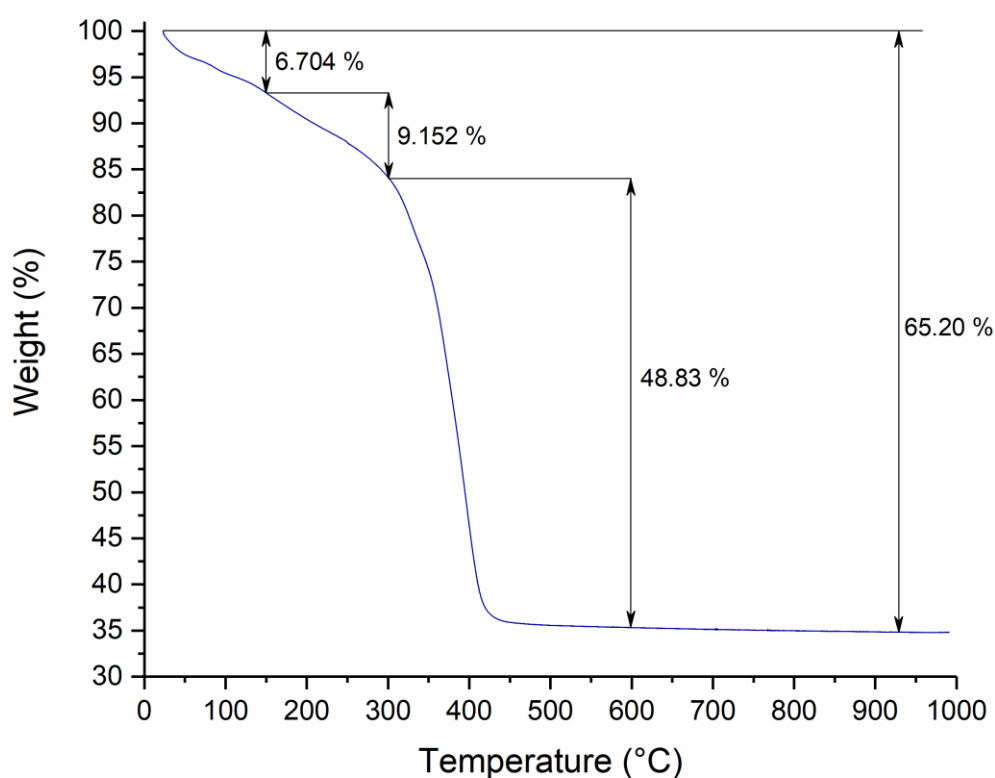

**Figure S25.** Nitrogen adsorption/desorption isotherms of pristine NEU-5 and Fe<sub>2</sub>P@PNDCN.

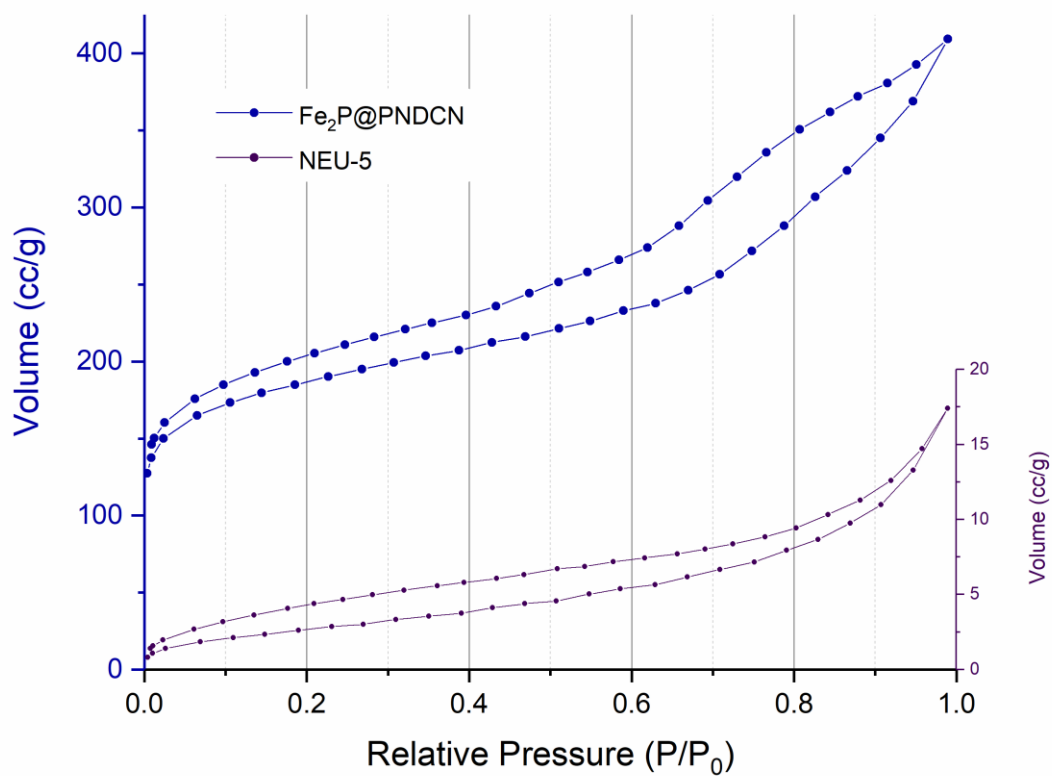

**Figure S26.** Nitrogen adsorption/desorption isotherms of pristine NEU-6 and RuP@PNDCN.

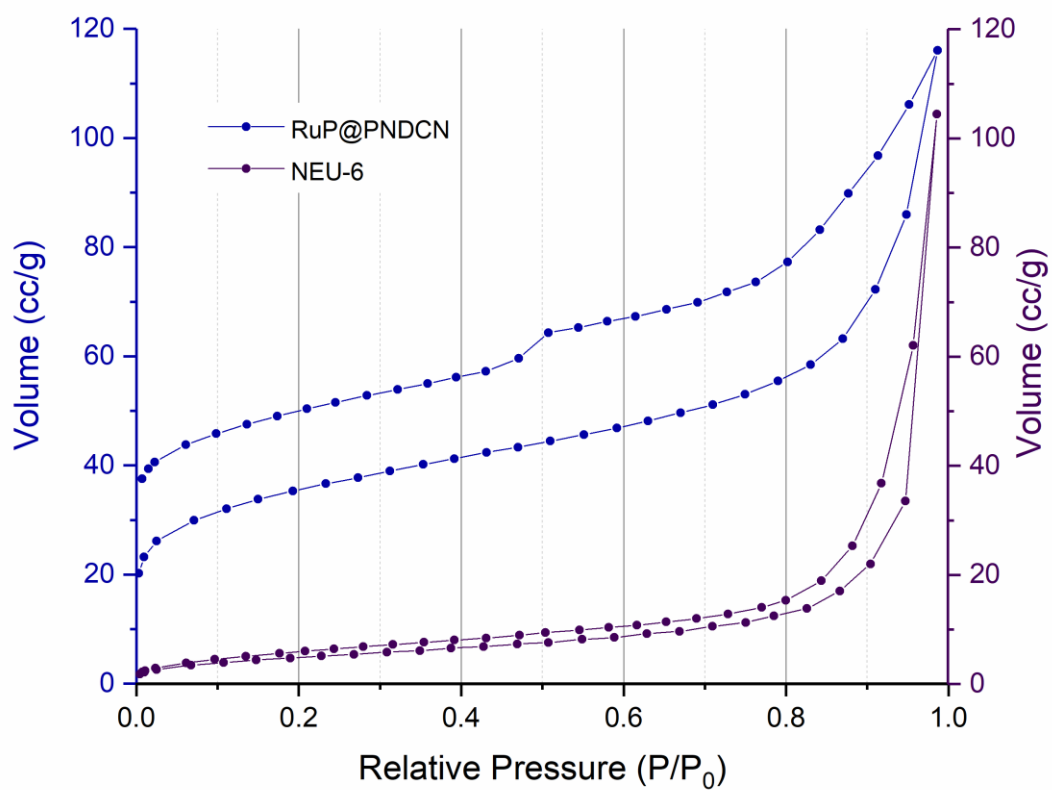



**Figure S27.** Nitrogen adsorption/desorption isotherms of pristine NEU-7 and  $\text{Fe}_3\text{O}_4/\text{RuO}_2@$ NEU-7.

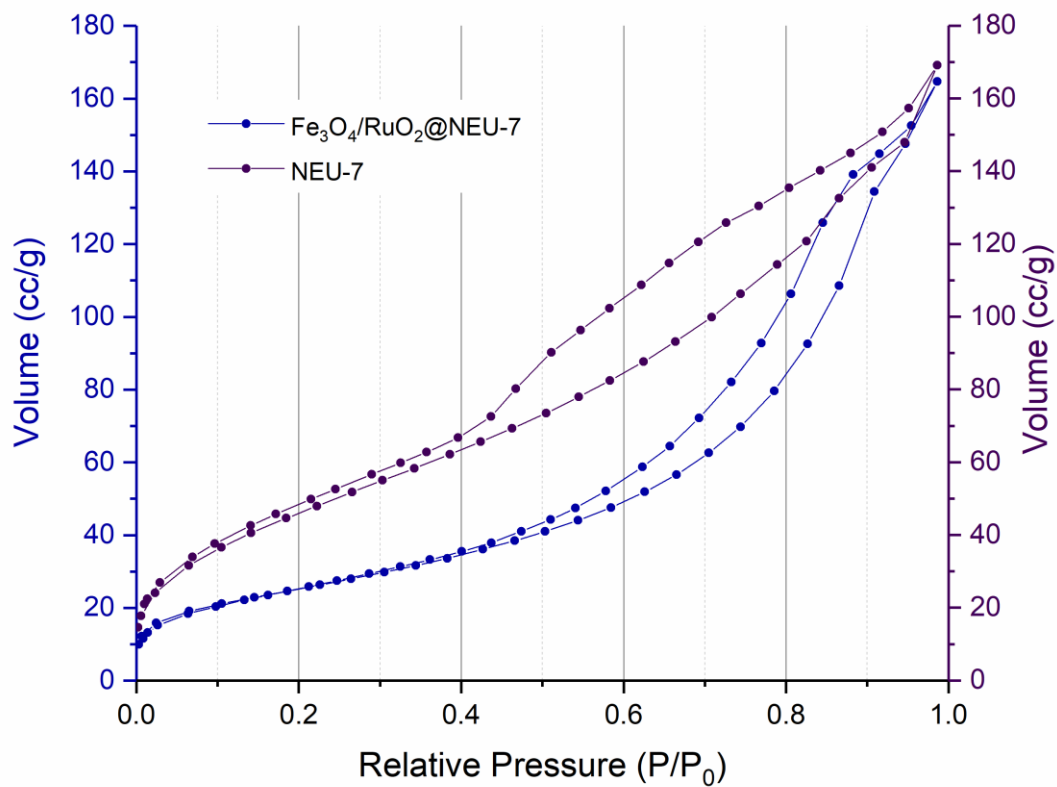

**Figure S28.** Nitrogen adsorption/desorption isotherms of pristine NEU-8 and Ru<sub>2</sub>O/TiN/TiO<sub>2</sub>@NEU-8.

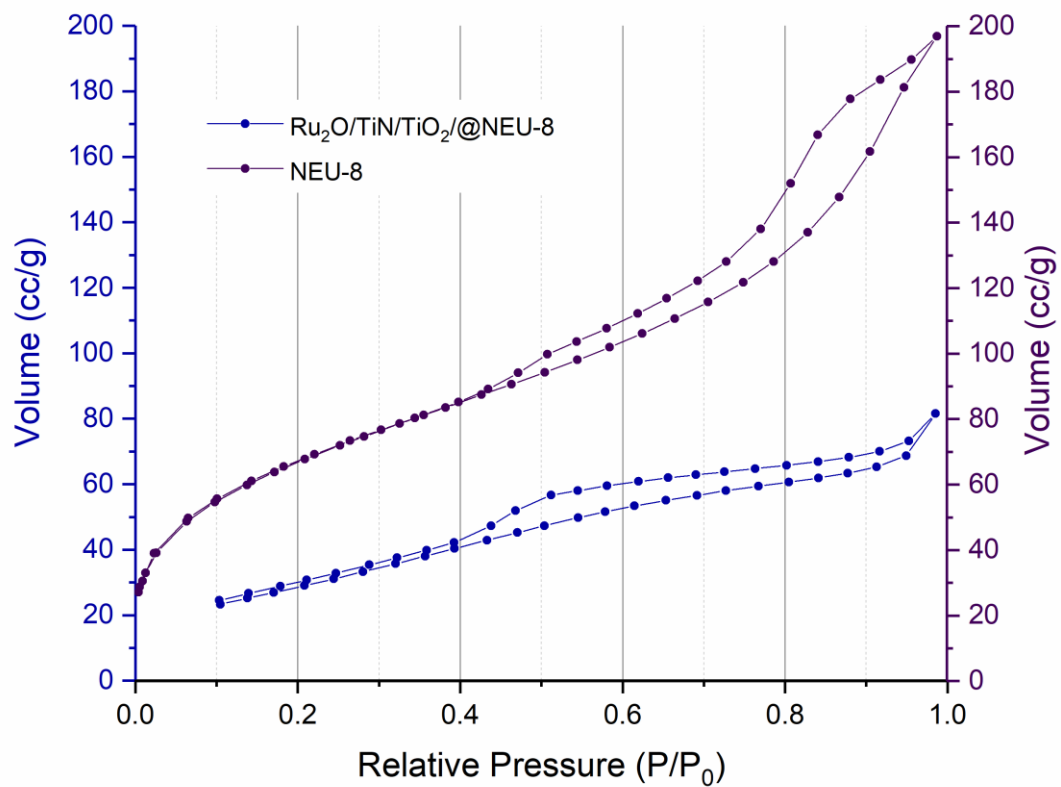

**Figure S29.** DFT pore analysis of pristine NEU-5 and Fe<sub>2</sub>P@PNDCN.

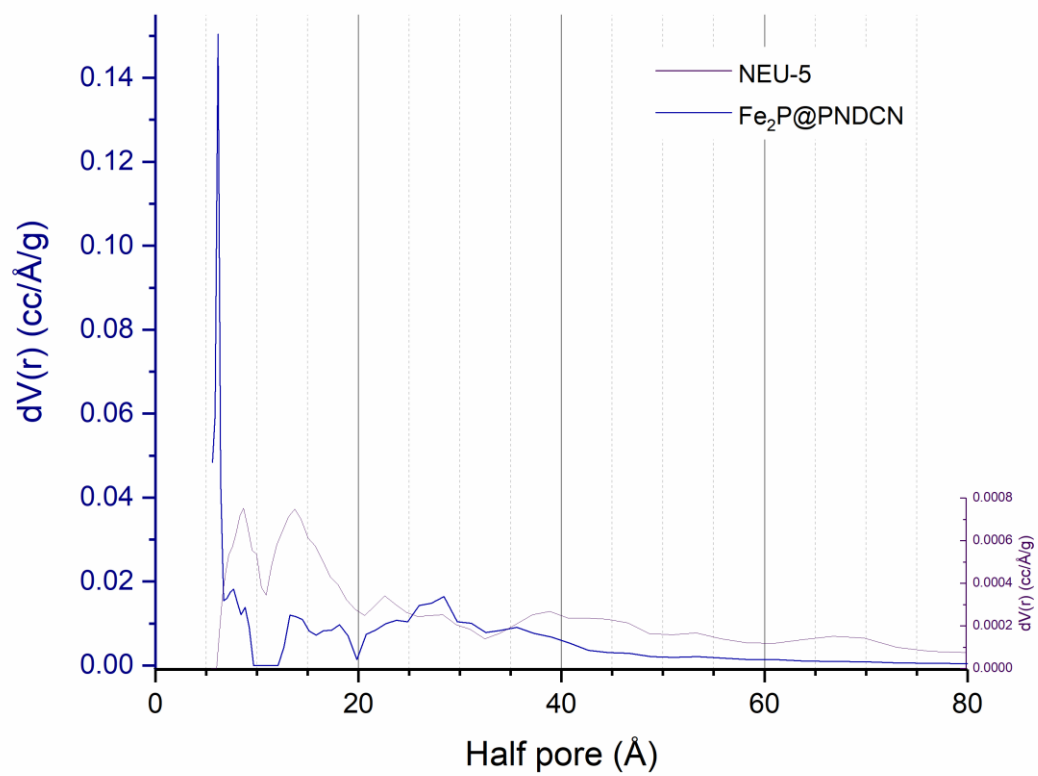

**Figure S30.** DFT pore analysis of pristine NEU-6 and RuP@PNDCN.

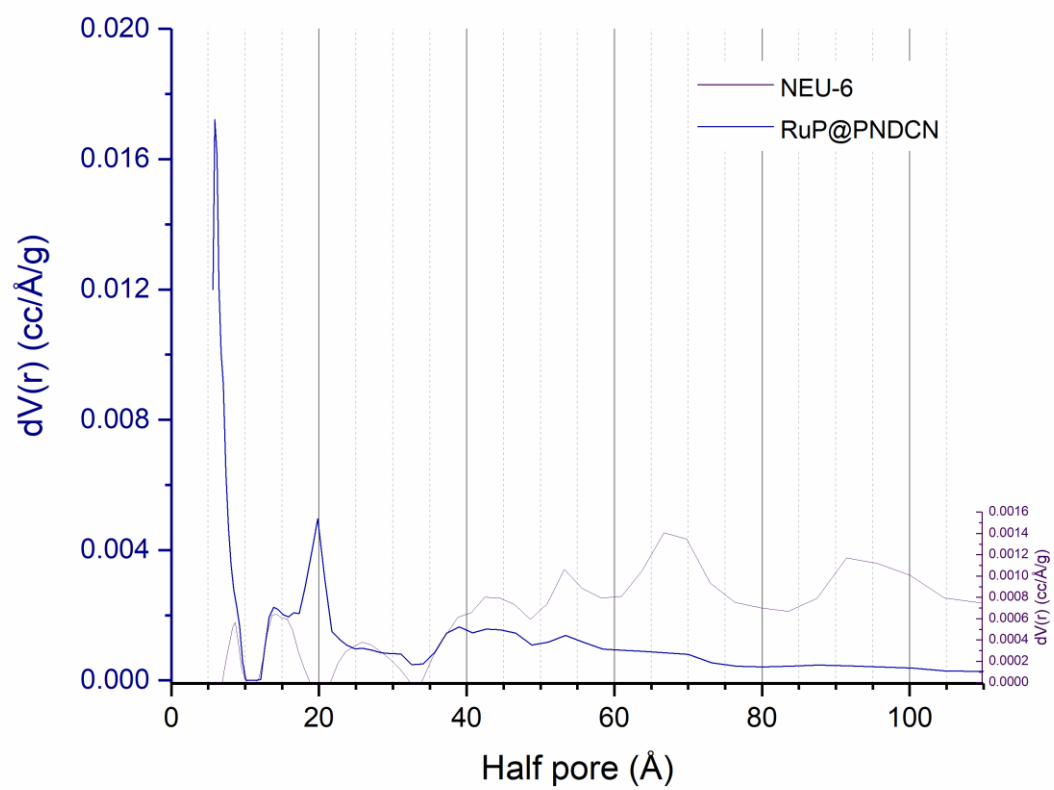

**Figure S31.** DFT pore analysis of pristine NEU-7 and Fe<sub>3</sub>O<sub>4</sub>/RuO<sub>2</sub>@NEU-7.

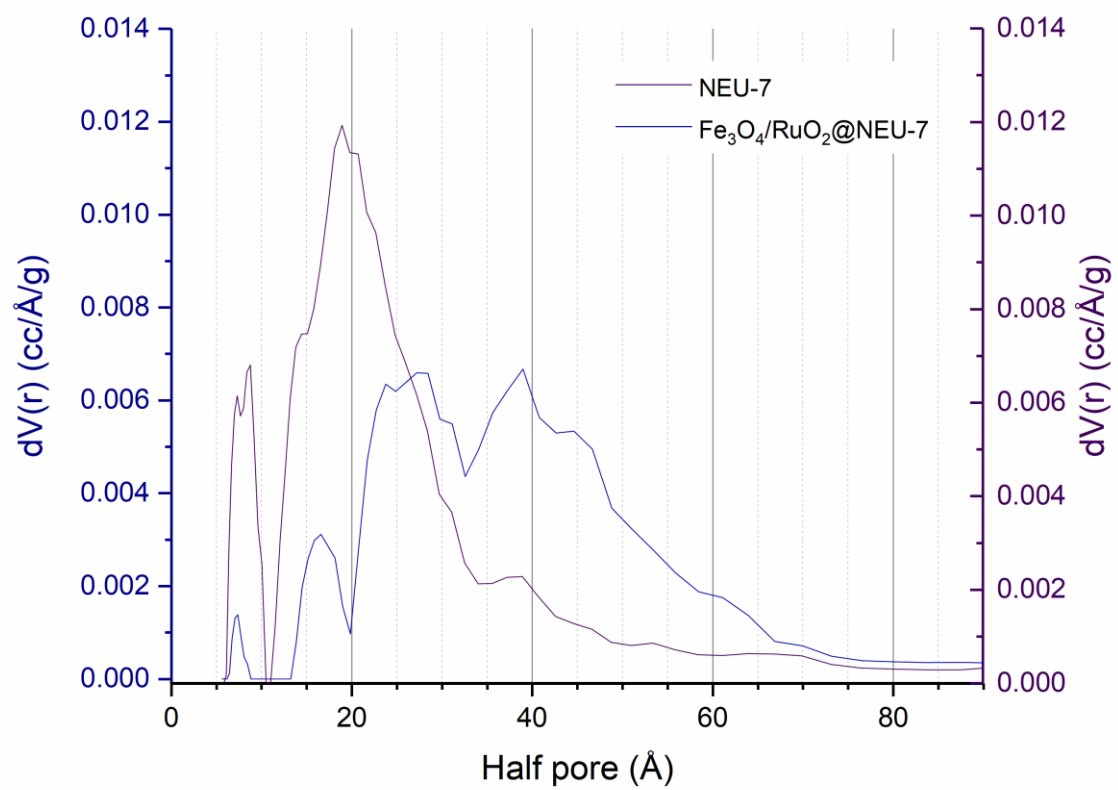

**Figure S32.** DFT pore analysis of pristine NEU-8 and Ru<sub>2</sub>O/TiN/TiO<sub>2</sub>@NEU-8.

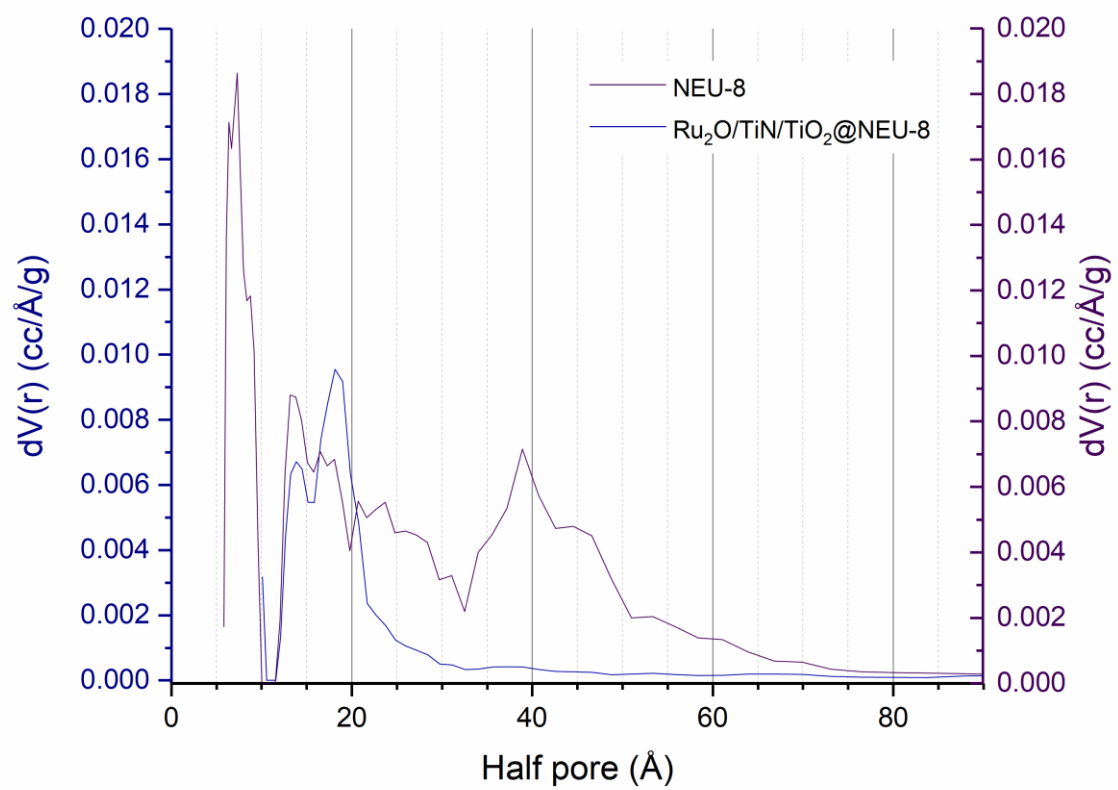

**Figure S33.** EDX characterization of Fe<sub>2</sub>P@PNDCN. It shows the presence of iron (~15 %w) as well as that of carbon (~78 %w), nitrogen (~3 %w), and phosphorus (~5 %w). Weight content was determined in different zones and the average was calculated.

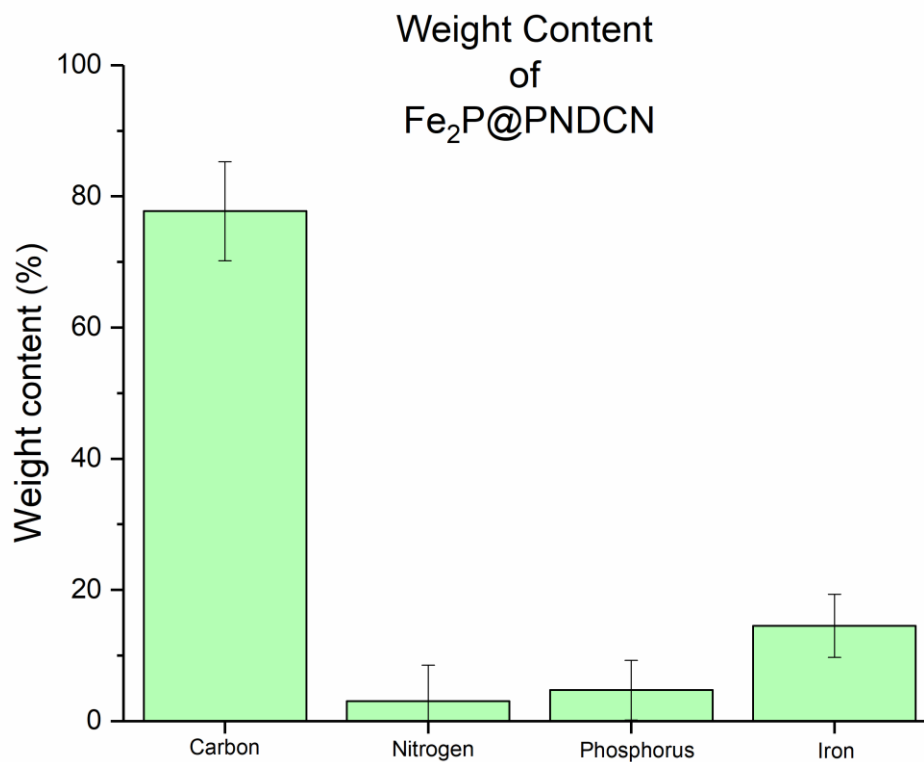

**Figure S34.** EDX characterization of Fe<sub>2</sub>P@PNDCN. It shows the presence of iron (~4 %m) as well as that of carbon (~91 %m), nitrogen (~3 %m), and phosphorus (~2 %m). Atomic content was determined in different zones and the average was calculated.

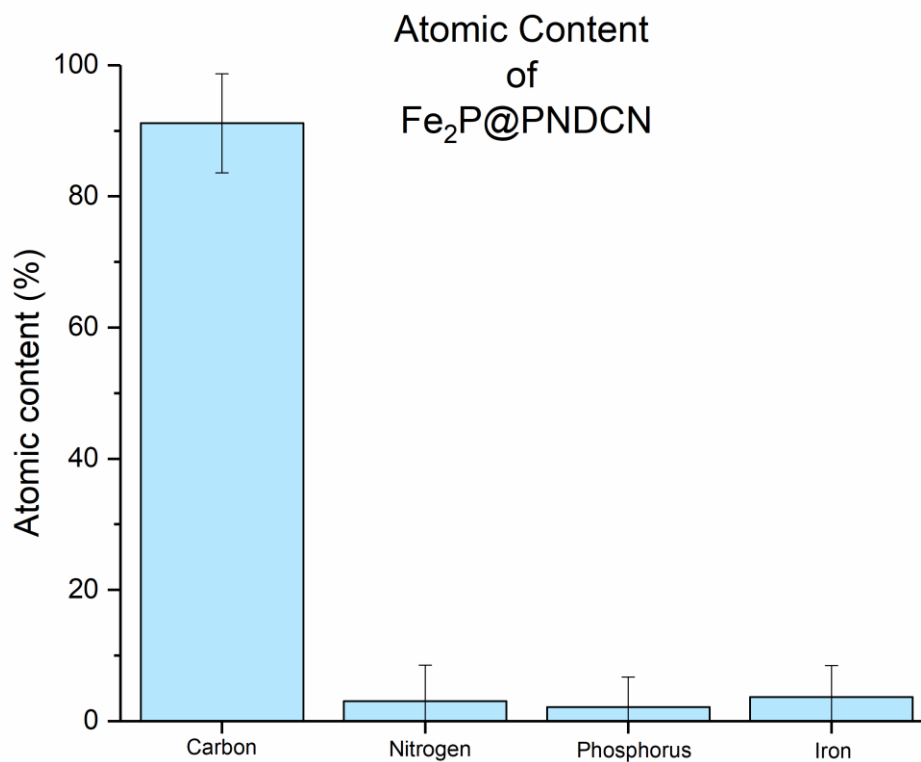



**Figure S35.** EDX characterization of RuP@PND CN. It shows the presence of ruthenium (~34 %w) as well as that of carbon (~49 %w), nitrogen (~1 %w), and phosphorus (~16 %w). Weight content was determined in different zones and the average was calculated.

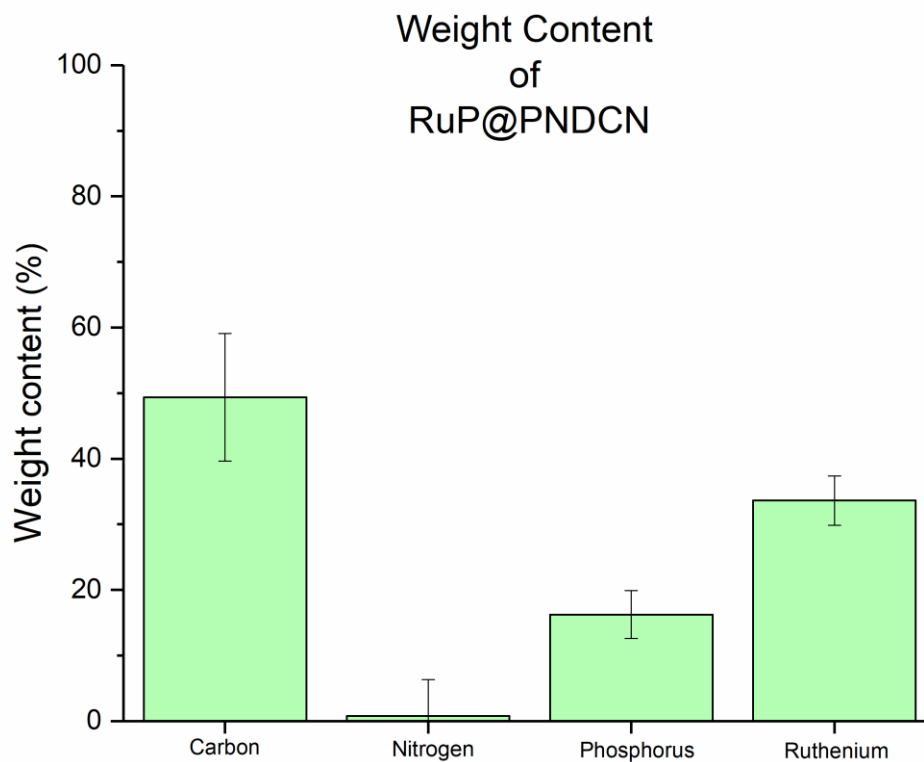

**Figure S36.** EDX characterization of RuP@PNDCN. It shows the presence of ruthenium (~8 %m) as well as that of carbon (~80 %m), nitrogen (~1 %m), and phosphorus (~12 %m). Atomic content was determined in different zones and the average was calculated.

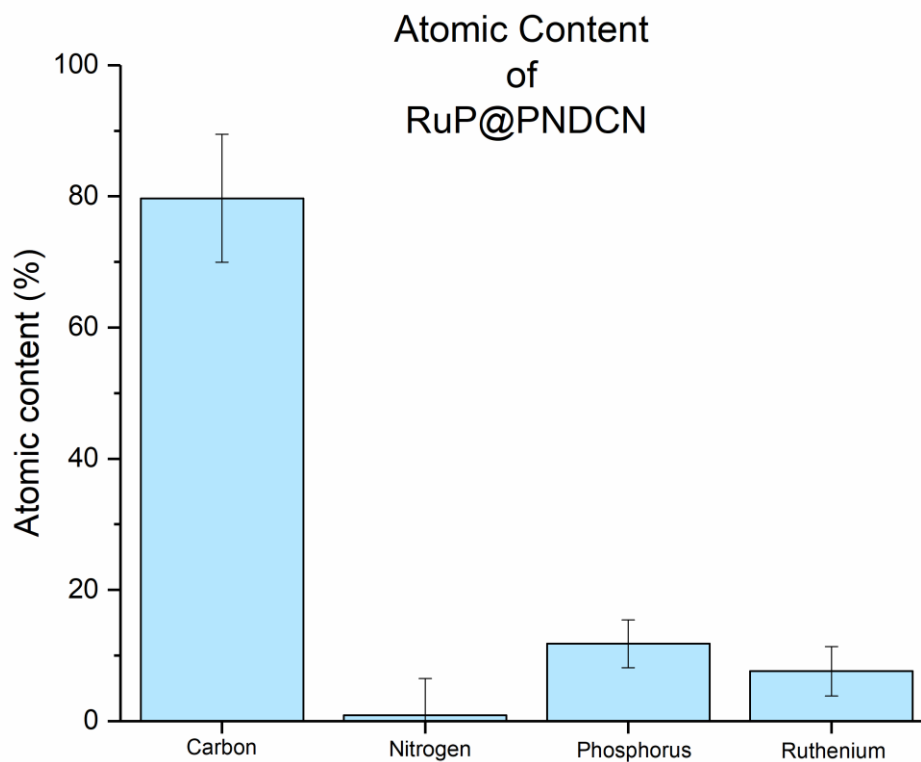

**Figure S37.** EDX characterization of  $\text{Fe}_3\text{O}_4/\text{RuO}_2@\text{NEU-7}$ . It shows the presence of ruthenium (~1 %w) and iron (~44 %w), as well as that of carbon (~8 %w), nitrogen (~5 %w), oxygen (~39 %w), and phosphorus (~3 %w). Weight content was determined in different zones and the average was calculated.

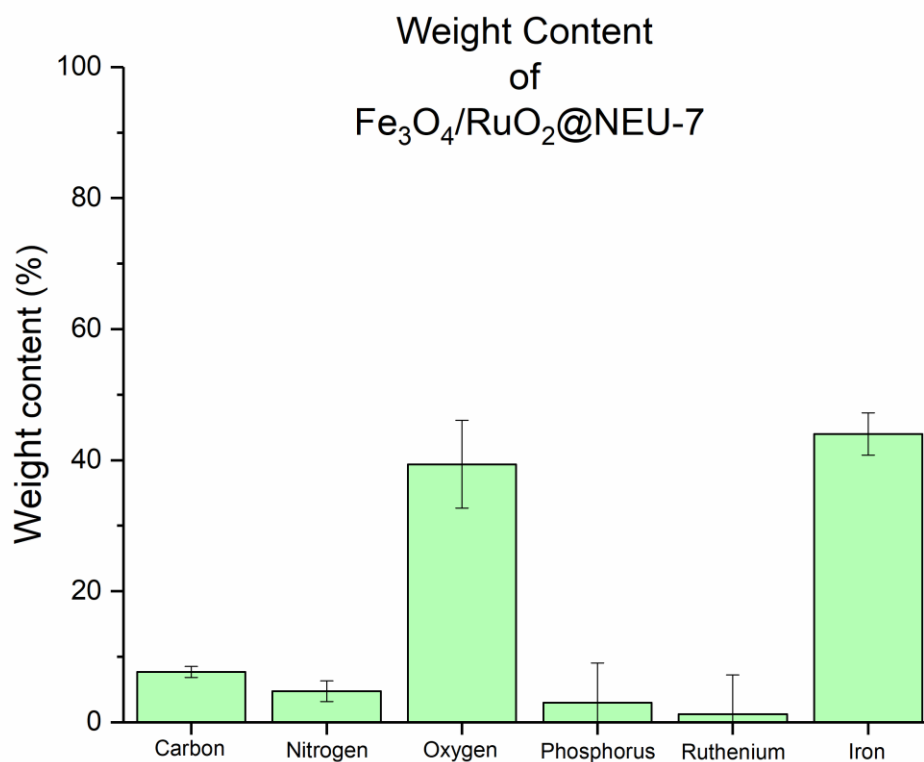

**Figure S38.** EDX characterization of  $\text{Fe}_3\text{O}_4/\text{RuO}_2@\text{NEU-7}$ . It shows the presence of ruthenium (~1 %m) and iron (~22 %m), as well as that of carbon (~18 %m), nitrogen (~9 %m), oxygen (~48 %m), and phosphorus (~3 %m). Atomic content was determined in different zones and the average was calculated.

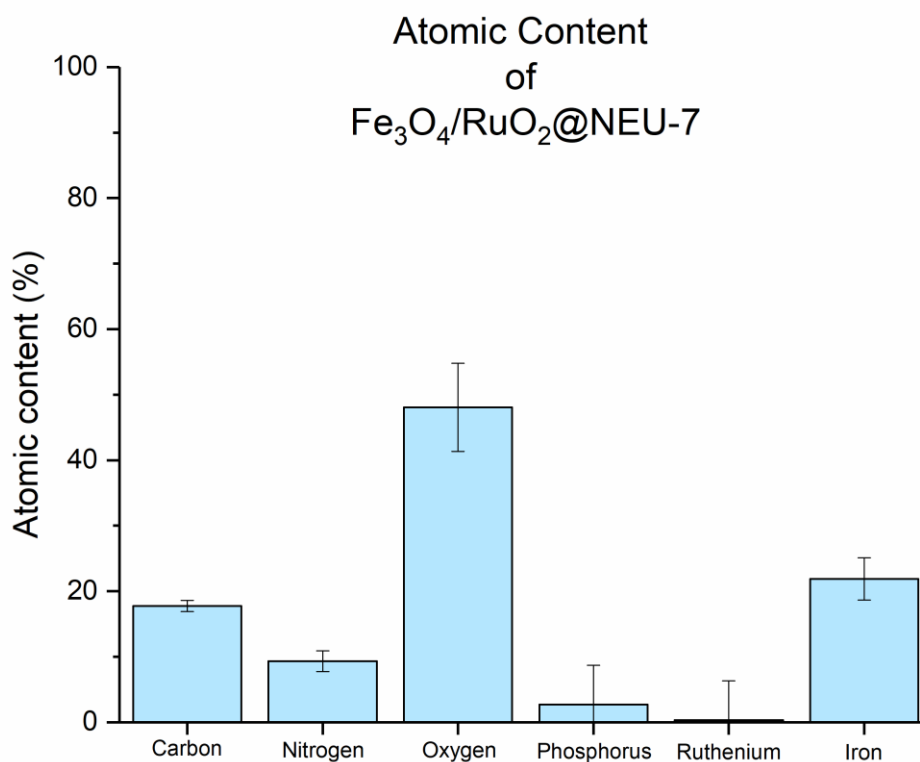

**Figure S39.** EDX characterization of Ru<sub>2</sub>O/TiO/TiO<sub>2</sub>@NEU-8. It shows the presence of ruthenium (~9 %w) and titanium (~3 %w), as well as that of carbon (~70 %w), nitrogen (~3 %w), oxygen (~11 %w), and phosphorus (~4 %w). Weight content was determined in different zones and the average was calculated.

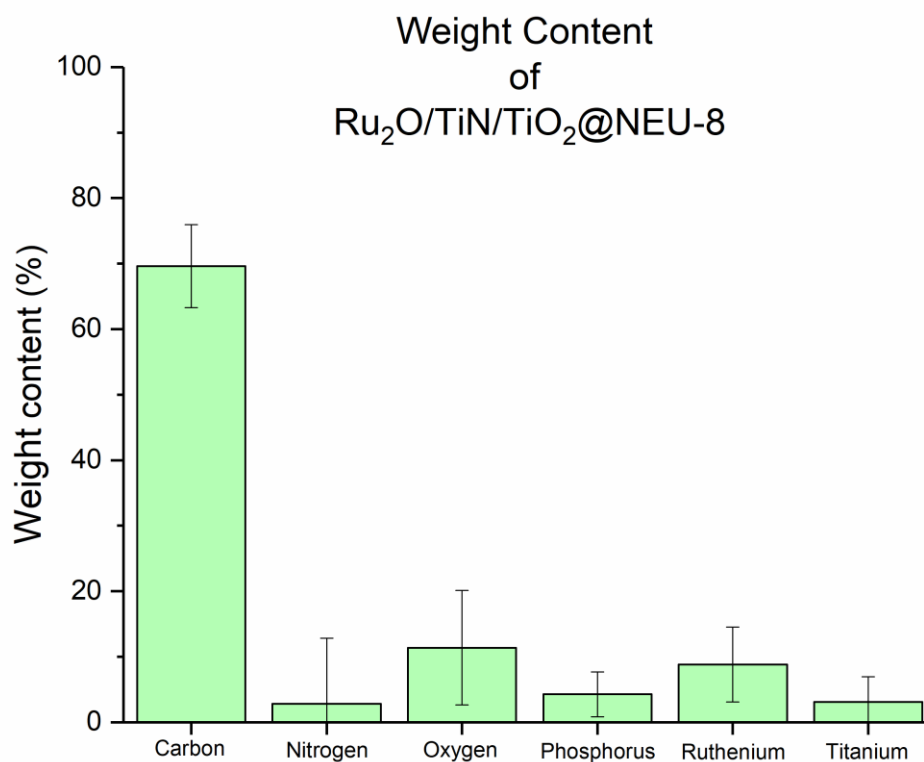

**Figure S40.** EDX characterization of Ru<sub>2</sub>O/TiO/TiO<sub>2</sub>@NEU-8. It shows the presence of ruthenium (~1 %m) and titanium (~1 %m), as well as that of carbon (~83 %m), nitrogen (~3 %m), oxygen (~10 %m), and phosphorus (~2 %m). Atomic content was determined in different zones and the average was calculated.

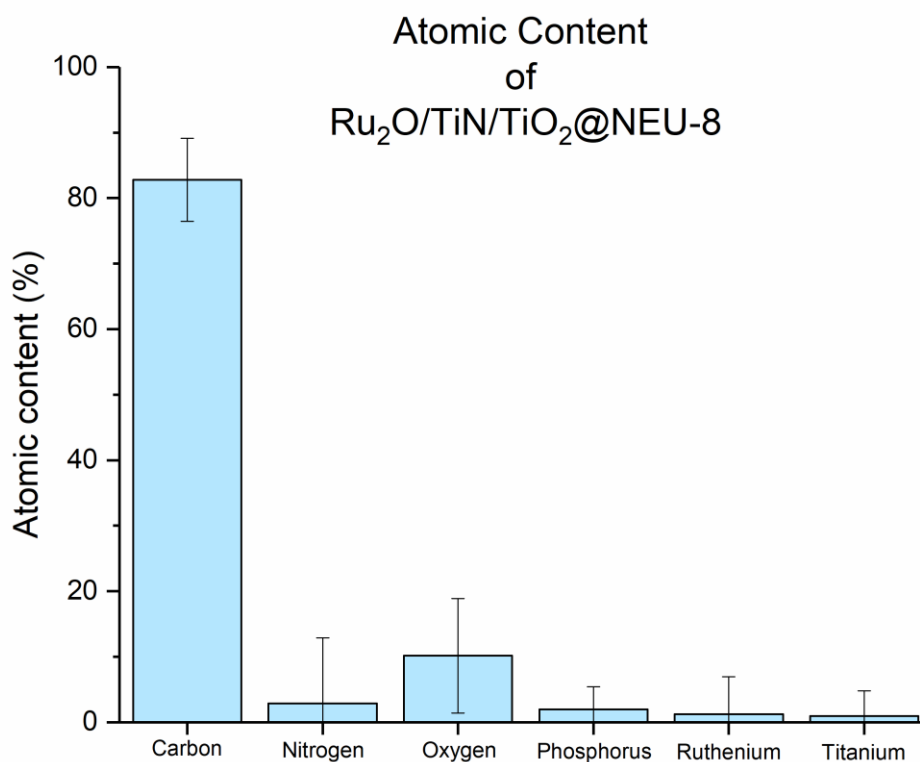

**Figure S41.** Particle size distribution of Fe<sub>2</sub>P in Fe<sub>2</sub>P@PNDCN (obtained by counting more than 100 particles).

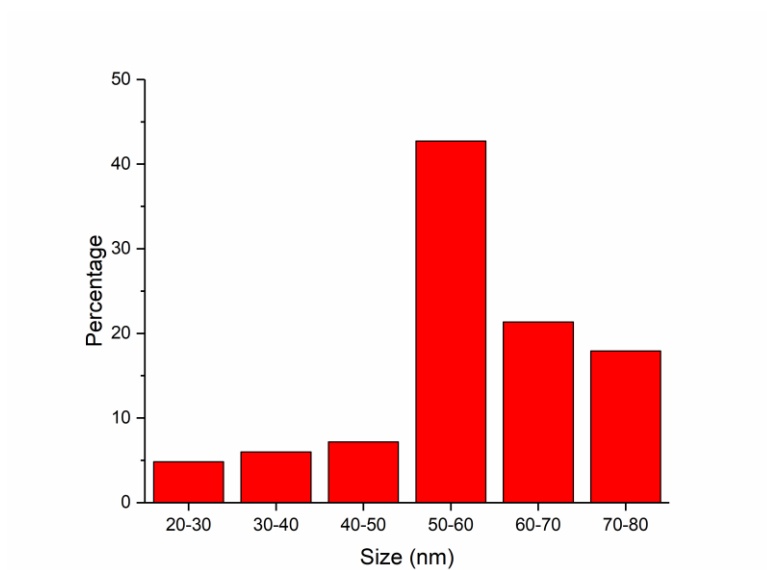

**Figure S42.** Particle size distribution of RuP in RuP@PNDCN (obtained by counting more than 100 particles).

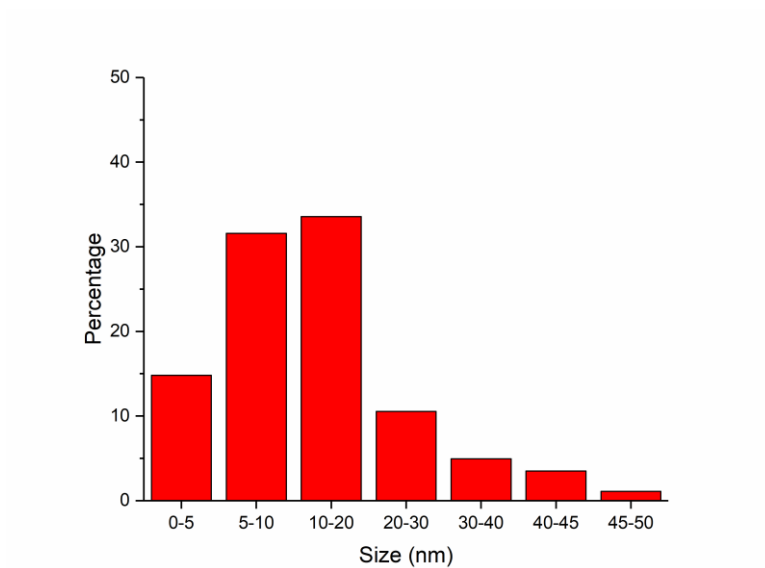



**Figure S43.** Particle size distribution of Fe<sub>3</sub>O<sub>4</sub> and RuO<sub>2</sub> in Fe<sub>3</sub>O<sub>4</sub>/RuO<sub>2</sub>@NEU-7 (obtained by counting more than 100 particles).

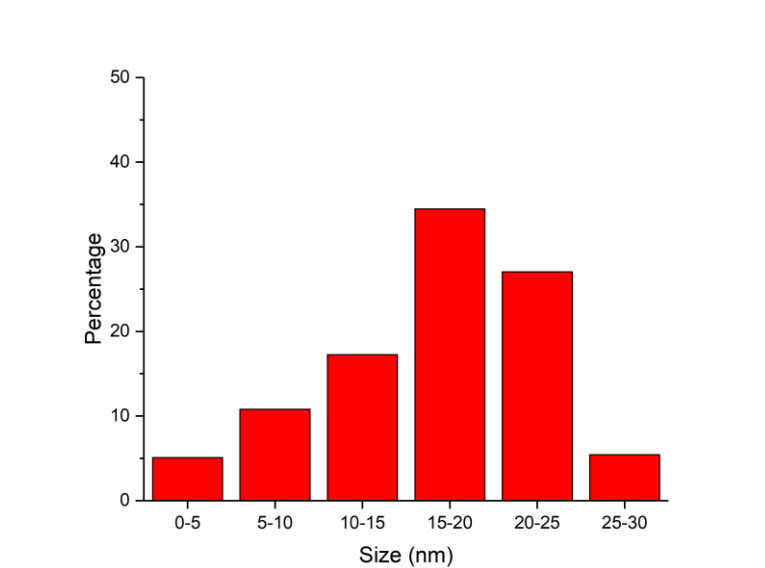

**Figure S44.** Particle size distribution of Ru<sub>2</sub>O, TiN and TiO<sub>2</sub> in Ru<sub>2</sub>O/TiN/TiO<sub>2</sub>@NEU-8 (obtained by counting more than 100 particles).

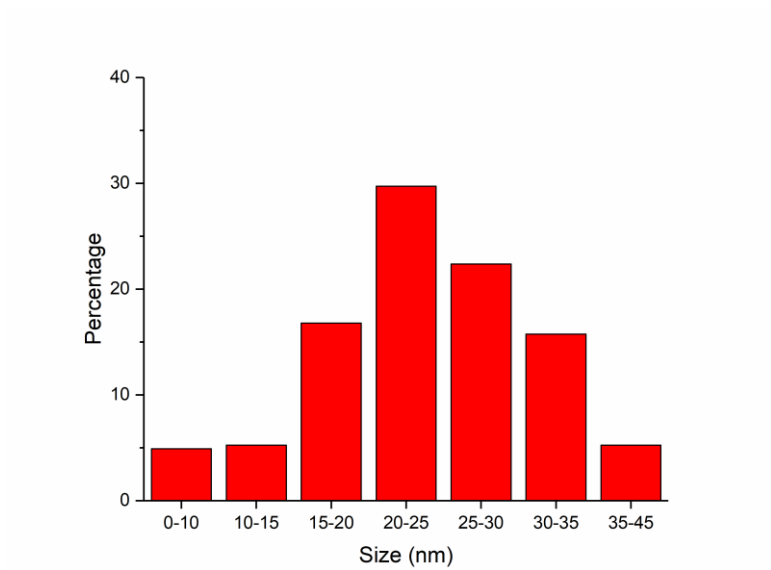

**Figure S45.** CVs of Fe<sub>2</sub>P@PNDCN catalyst recorded in O<sub>2</sub>- and Ar-saturated 0.5 M H<sub>2</sub>SO<sub>4</sub> electrolyte, measured at the scan rate of 10 mV s<sup>-1</sup>.

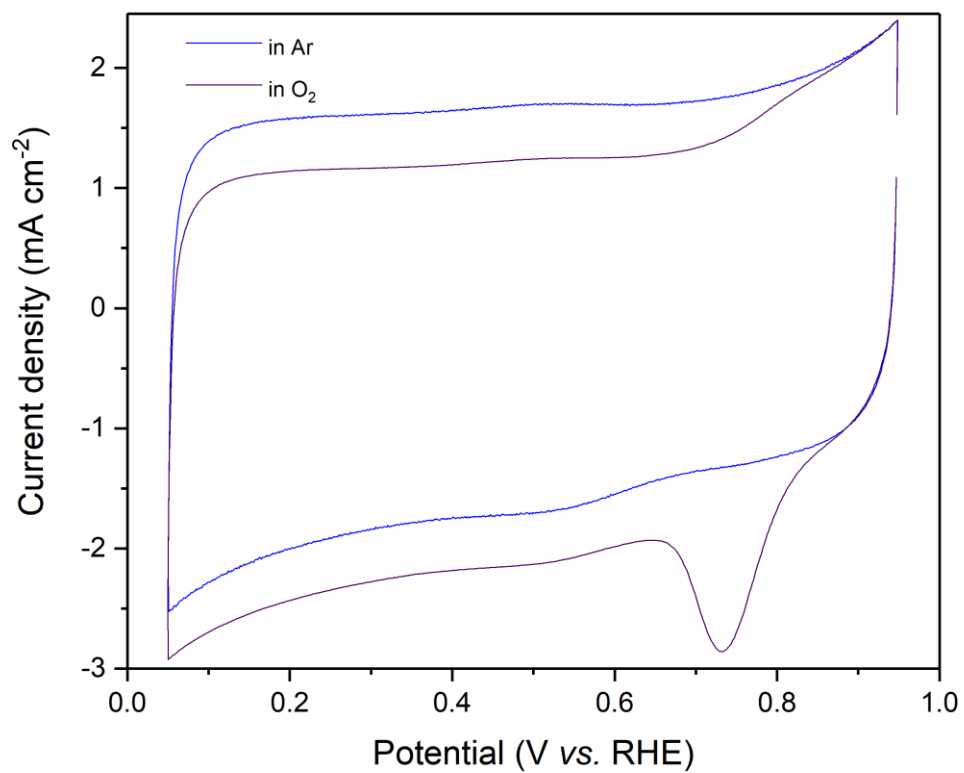

**Figure S46.** Polarization curves of Fe<sub>2</sub>P@PNDCN initially and after 5000 cyclic voltammetry sweeps. Recorded in O<sub>2</sub>-saturated 0.5 M H<sub>2</sub>SO<sub>4</sub> electrolyte, measured at a scan rate of 50 mV s<sup>-1</sup>. Catalyst loading: 0.8 mg cm<sup>-2</sup> (with iR compensation).

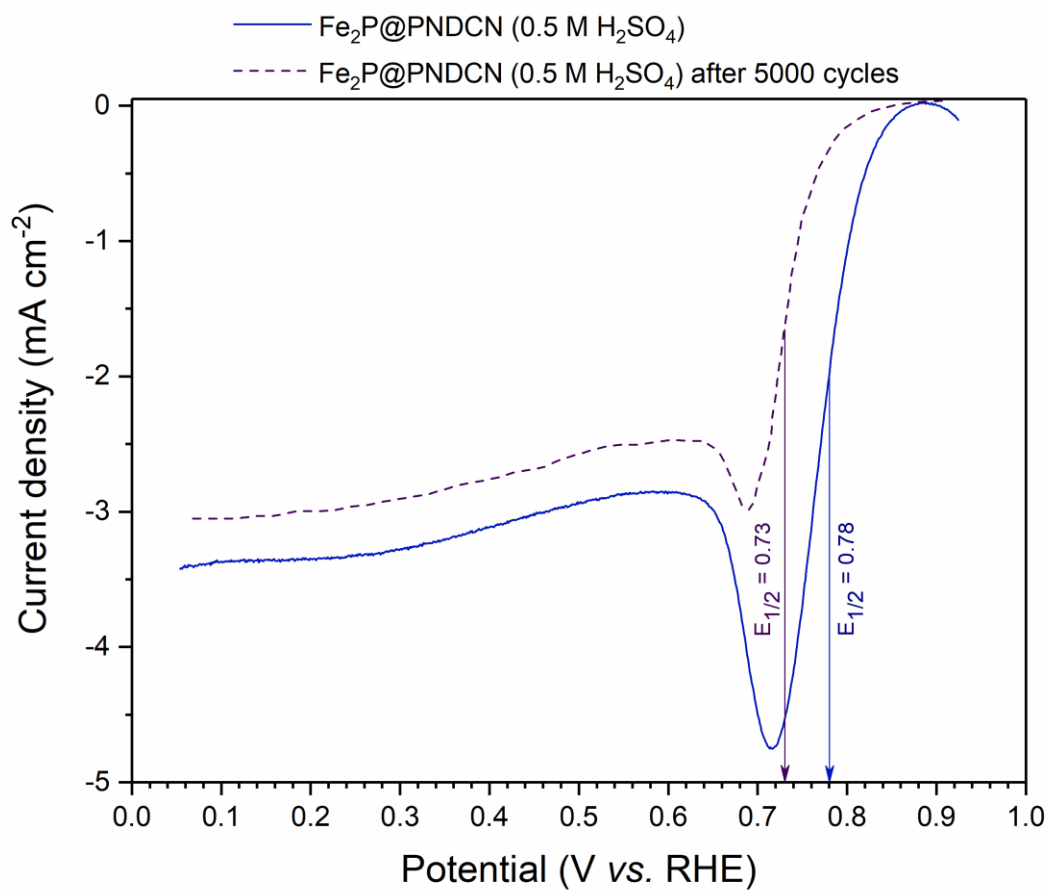

**Figure S47.** (a) XRD, (b) SEM and (c) TEM of Fe<sub>2</sub>P@PNDCN after the stability test in O<sub>2</sub>-saturated 0.5 M H<sub>2</sub>SO<sub>4</sub> electrolyte.

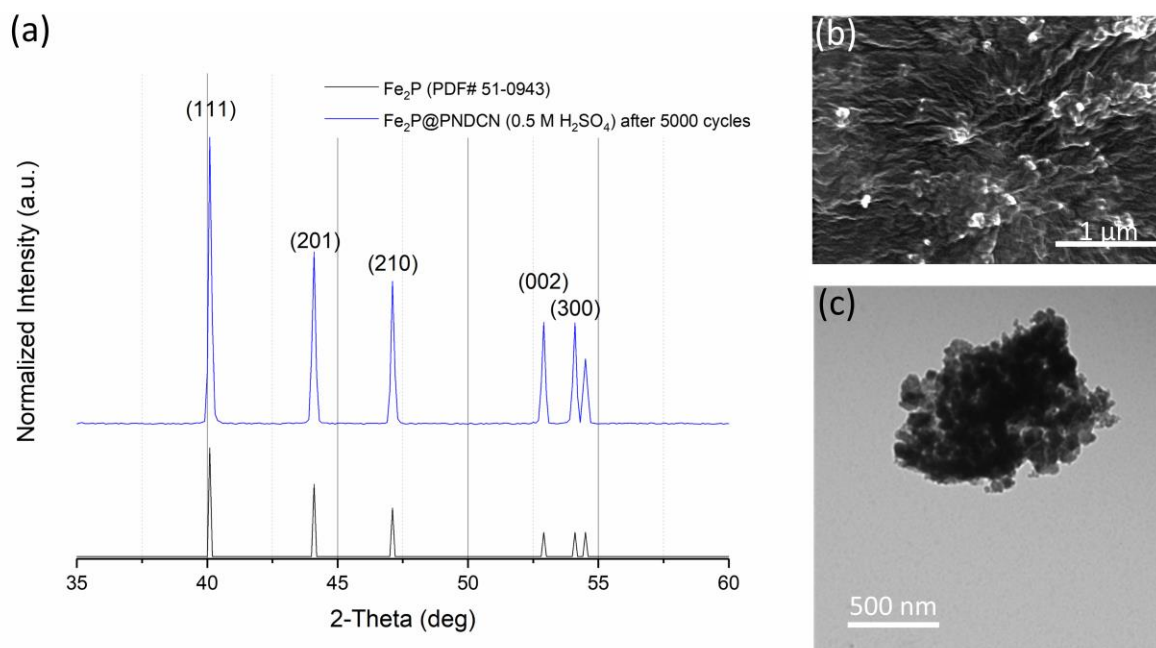

**Figure S48.** Polarization curves of Fe<sub>2</sub>P@PNDCN initially and after 5000 cyclic voltammetry sweeps. Recorded in O<sub>2</sub>-saturated 0.1 M HClO<sub>4</sub> electrolyte, measured at a scan rate of 50 mV s<sup>-1</sup>. Catalyst loading: 0.8 mg cm<sup>-2</sup> (with iR compensation).

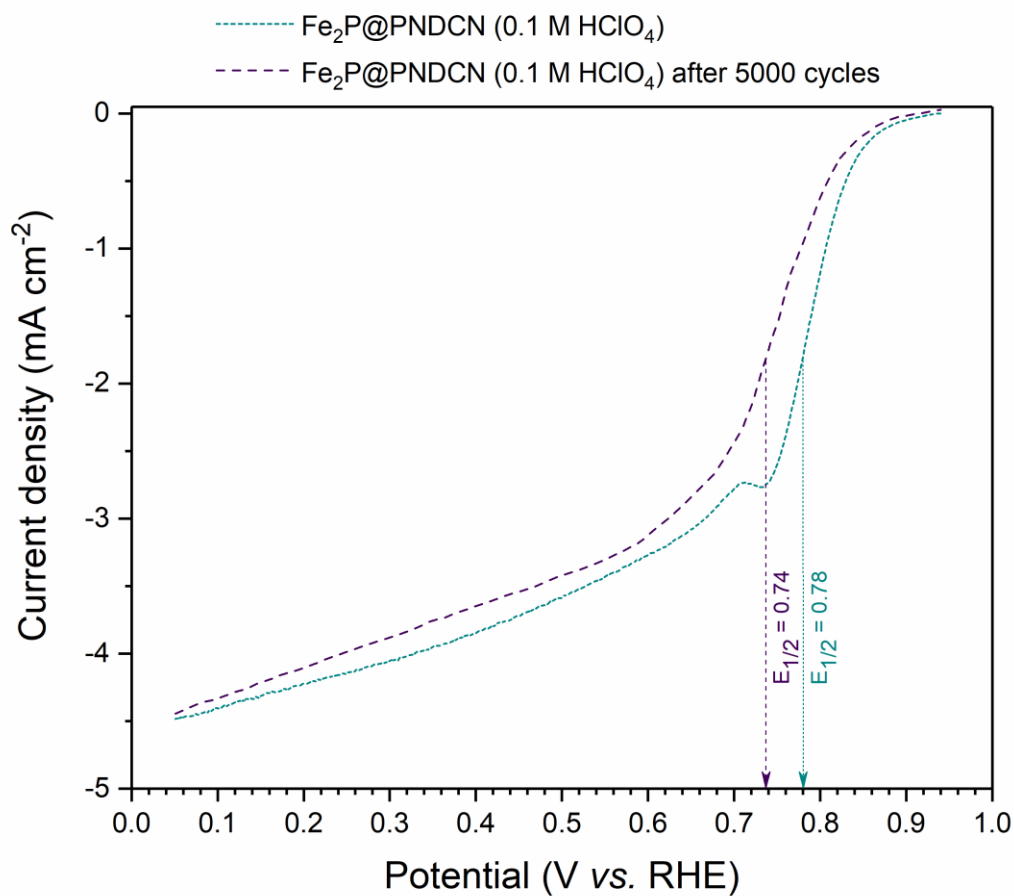

**Figure S49.** (a) XRD, (b) SEM and (c) TEM of Fe<sub>2</sub>P@PNDCN after the stability test in O<sub>2</sub>-saturated 0.1 M HClO<sub>4</sub> electrolyte.

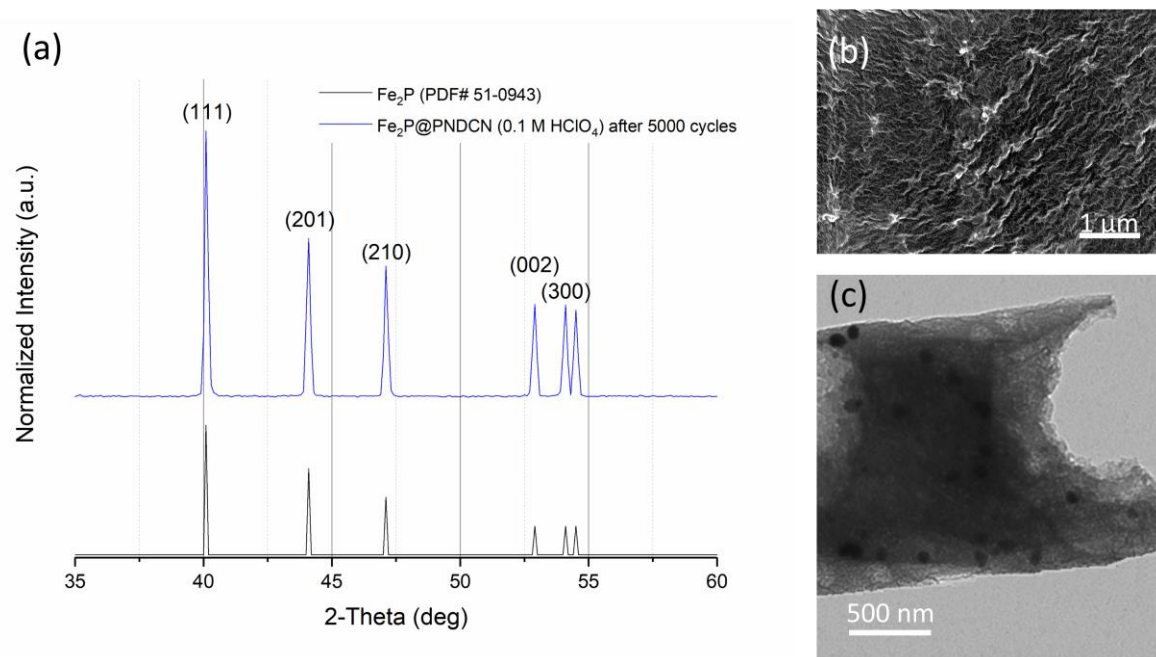

**Figure S50.** Polarization curves of Fe<sub>2</sub>P@PNDCN initially and after 5000 cyclic voltammetry sweeps. Recorded in O<sub>2</sub>-saturated 1 M KOH electrolyte, measured at a scan rate of 50 mV s<sup>-1</sup>. Catalyst loading: 0.8 mg cm<sup>-2</sup> (with iR compensation).

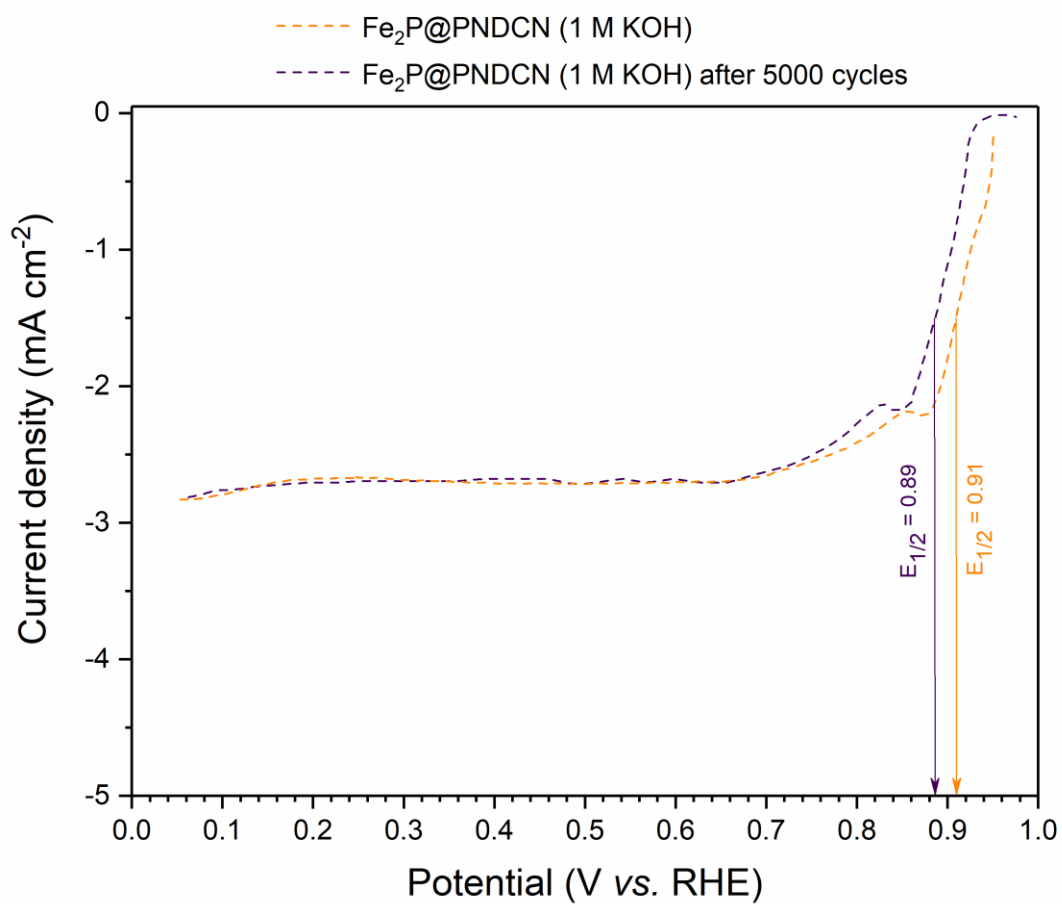



**Figure S51.** (a) XRD, (b) SEM and (c) TEM of Fe<sub>2</sub>P@PNDCN after the stability test in O<sub>2</sub>-saturated 1 M KOH electrolyte.

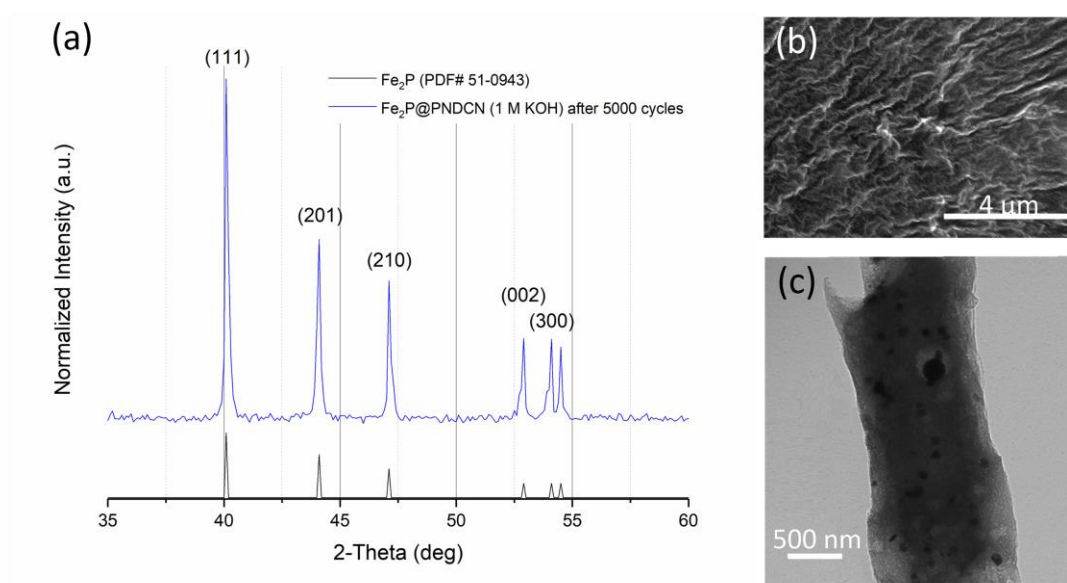

**Figure S52.** Polarization curves of RuP@PNDCN initially and after 5000 cyclic voltammetry sweeps. Recorded in H<sub>2</sub>-saturated 0.5 M H<sub>2</sub>SO<sub>4</sub> electrolyte, measured at a scan rate of 50 mV s<sup>-1</sup>. Catalyst loading: 0.285 mg cm<sup>-2</sup> (with iR compensation).

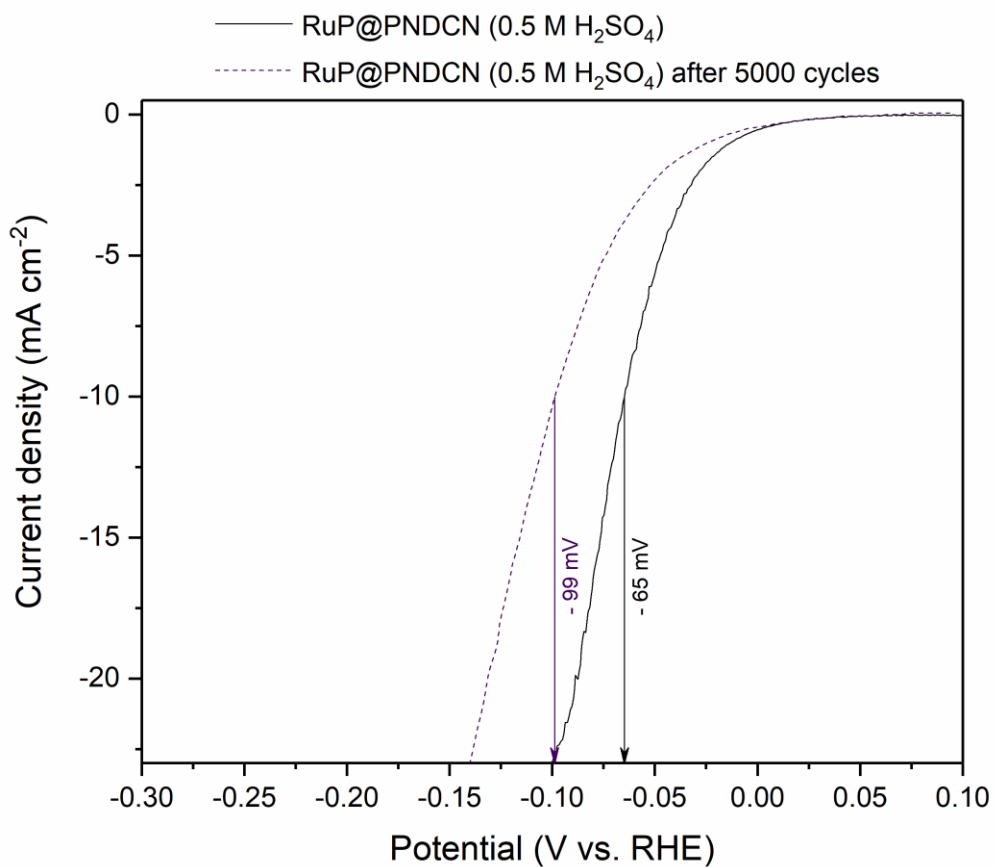

**Figure S53.** (a) XRD, (b) SEM and (c) TEM of RuP@PNDCN after the stability test in H<sub>2</sub>-saturated 0.5 M H<sub>2</sub>SO<sub>4</sub> electrolyte.

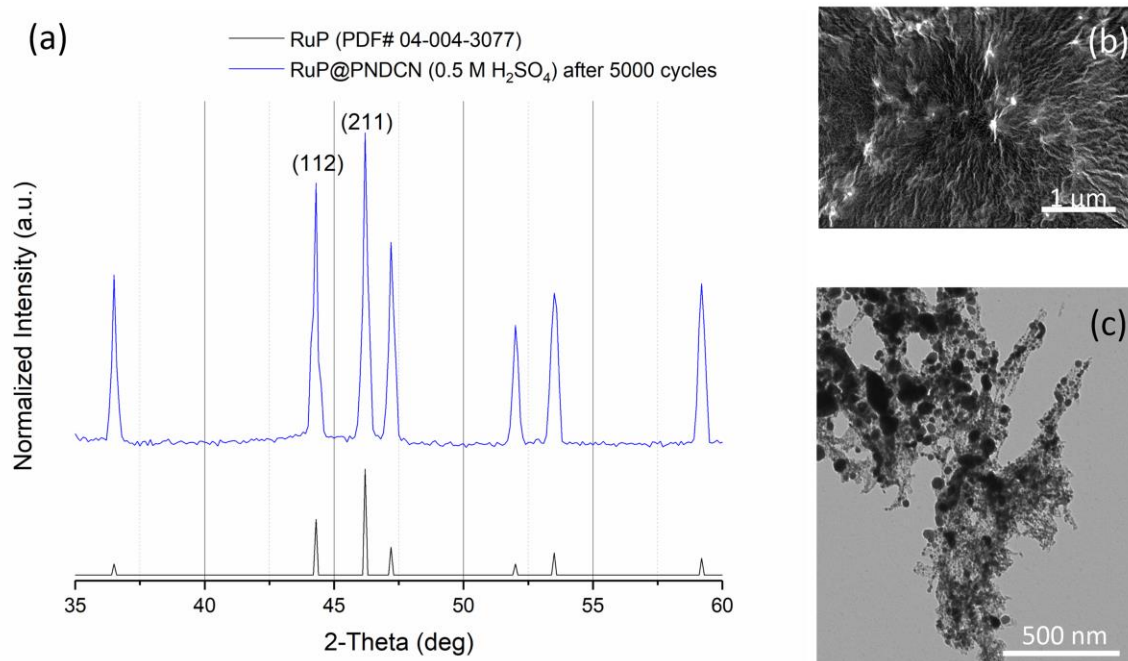

**Figure S54.** Polarization curves of RuP@PNDCN initially and after 5000 cyclic voltammetry sweeps. Recorded in H<sub>2</sub>-saturated 1 M KOH electrolyte, measured at a scan rate of 50 mV s<sup>-1</sup>. Catalyst loading: 0.285 mg cm<sup>-2</sup> (with iR compensation).

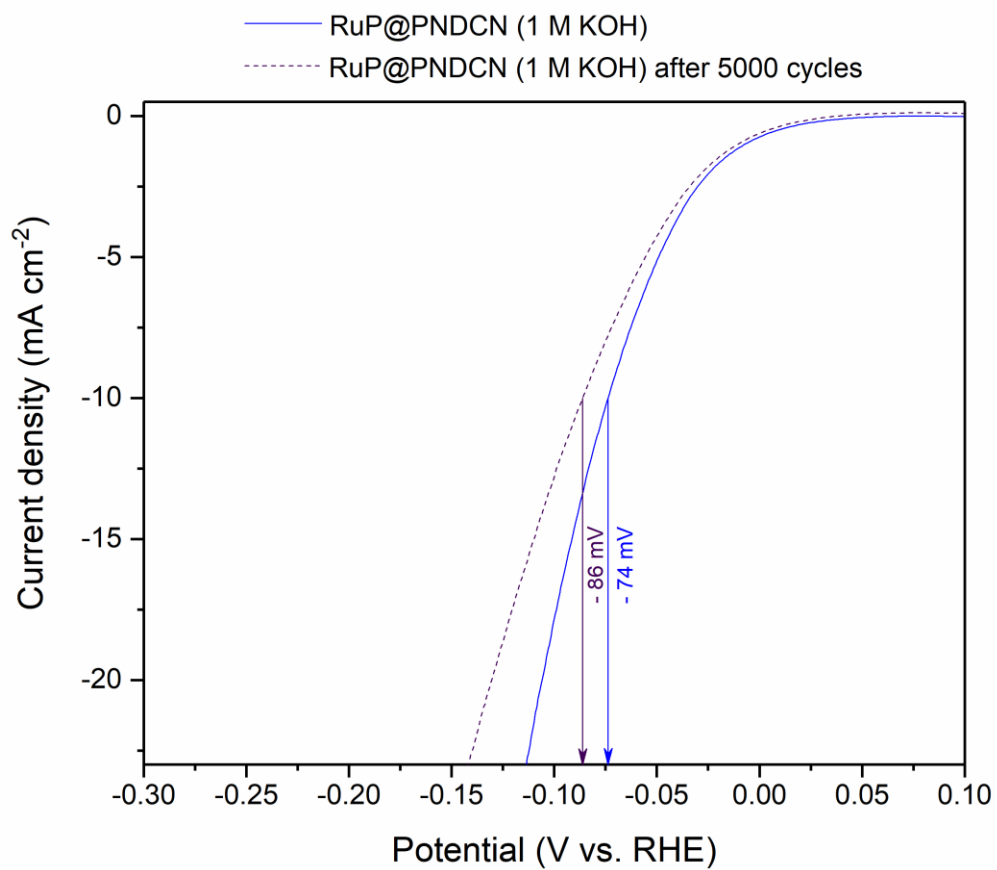

**Figure S55.** (a) XRD, (b) SEM and (c) TEM of RuP@PNDCN after the stability test in H<sub>2</sub>-saturated 1 M KOH electrolyte.

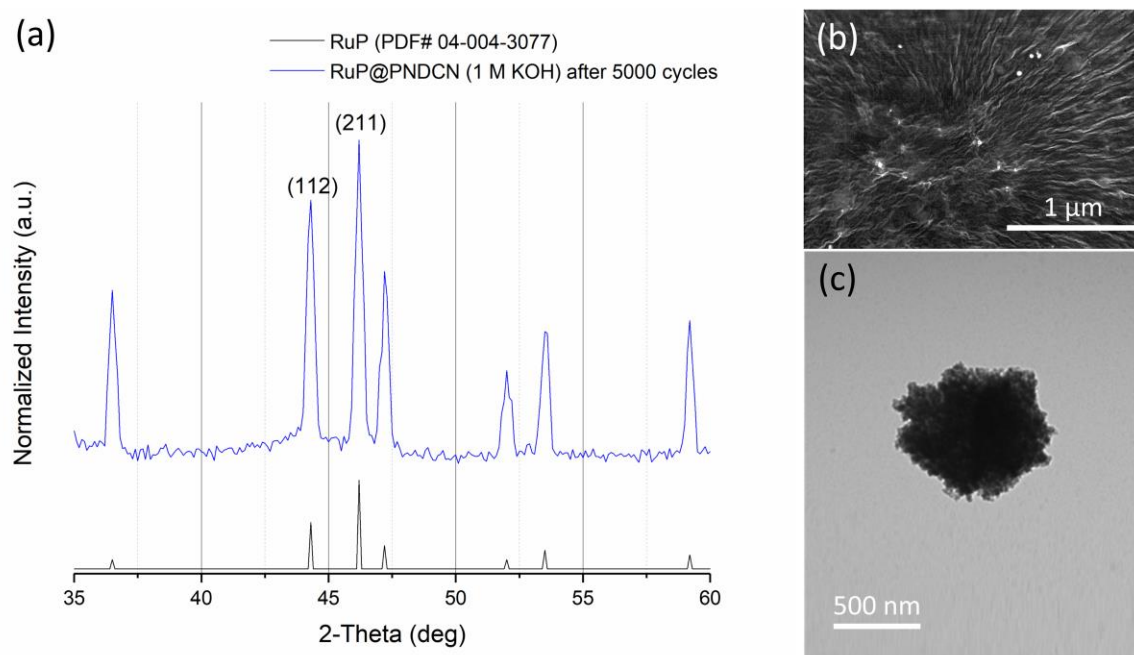

**Figure S56.** LSVs of the  $\text{Fe}_3\text{O}_4/\text{RuO}_2@$ NEU-7 catalyst, showing significant current density loss even after one LSV cycle.

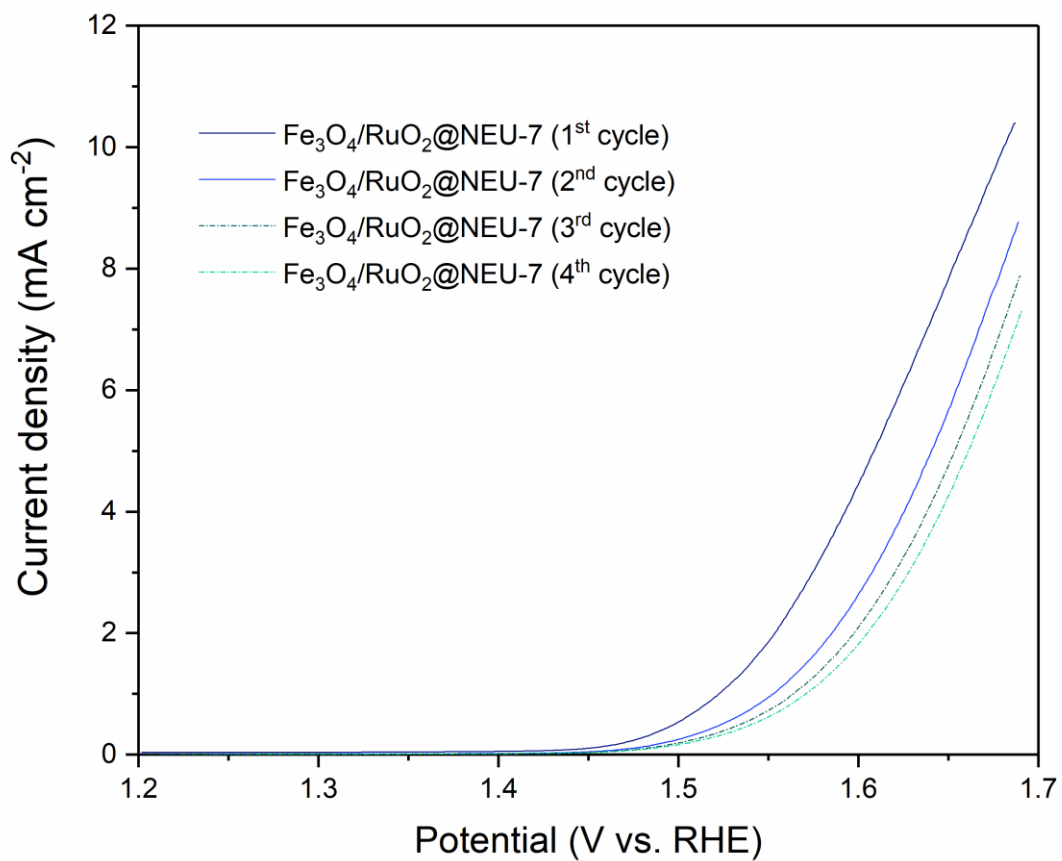

**Figure S57.** Polarization curves of  $\text{Fe}_3\text{O}_4/\text{RuO}_2@\text{NEU-7}$  initially and after 5000 cyclic voltammetry sweeps. Recorded in  $\text{O}_2$ -saturated 1 M KOH electrolyte, measured at a scan rate of  $50 \text{ mV s}^{-1}$ . Catalyst loading:  $0.255 \text{ mg cm}^{-2}$  (with iR compensation).

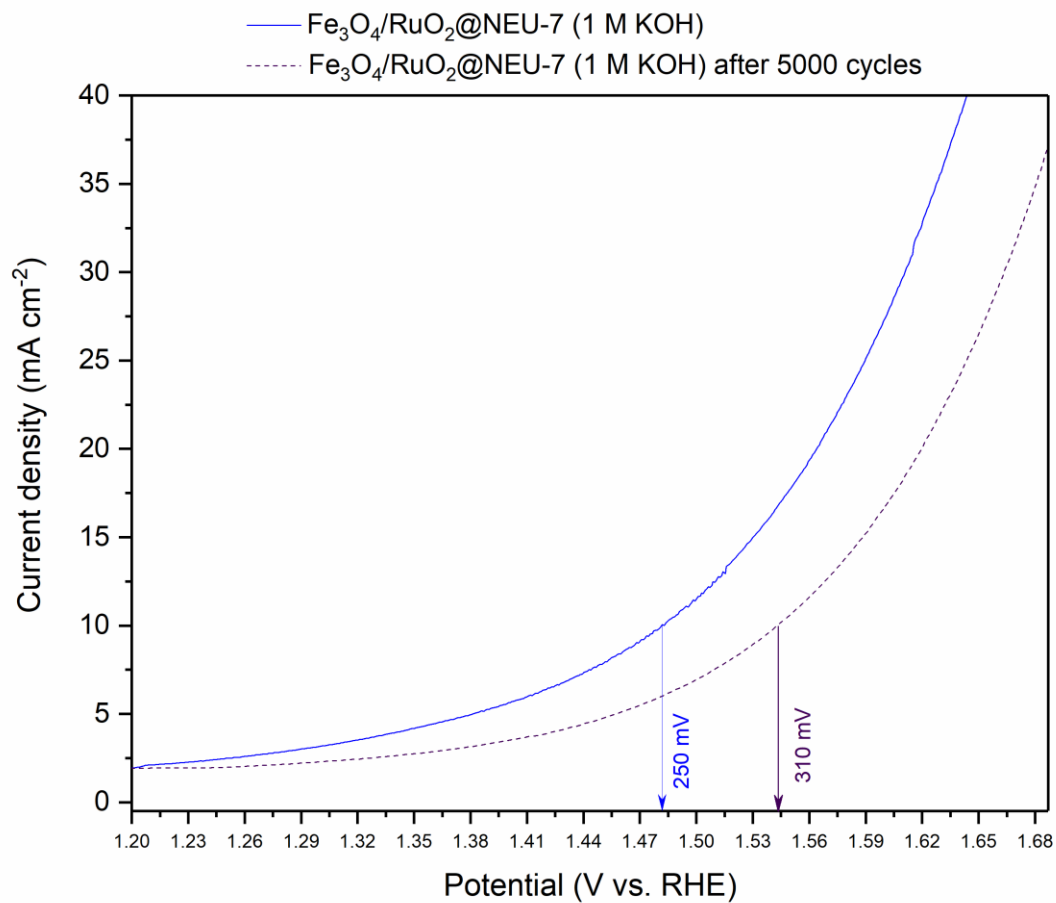

**Figure S58.** (a) XRD, (b) SEM and (c) TEM of  $\text{Fe}_3\text{O}_4/\text{RuO}_2@$ NEU-7 after the stability test in  $\text{O}_2$ -saturated 1 M KOH electrolyte.

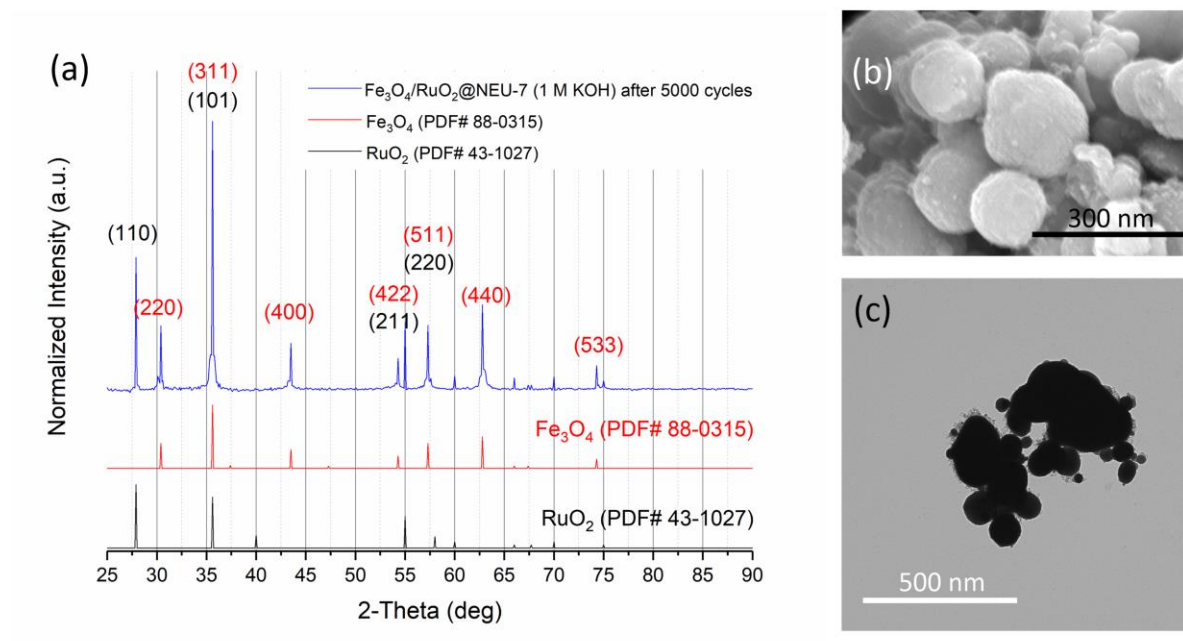



**Figure S59.** Polarization curves of Ru<sub>2</sub>O/TiN/TiO<sub>2</sub>@NEU-8 initially and after 5000 cyclic voltammetry sweeps in dark. Recorded in H<sub>2</sub>-saturated 0.5 M H<sub>2</sub>SO<sub>4</sub> electrolyte, measured at a scan rate of 50 mV s<sup>-1</sup>. Catalyst loading: 0.285 mg cm<sup>-2</sup> (with iR compensation).

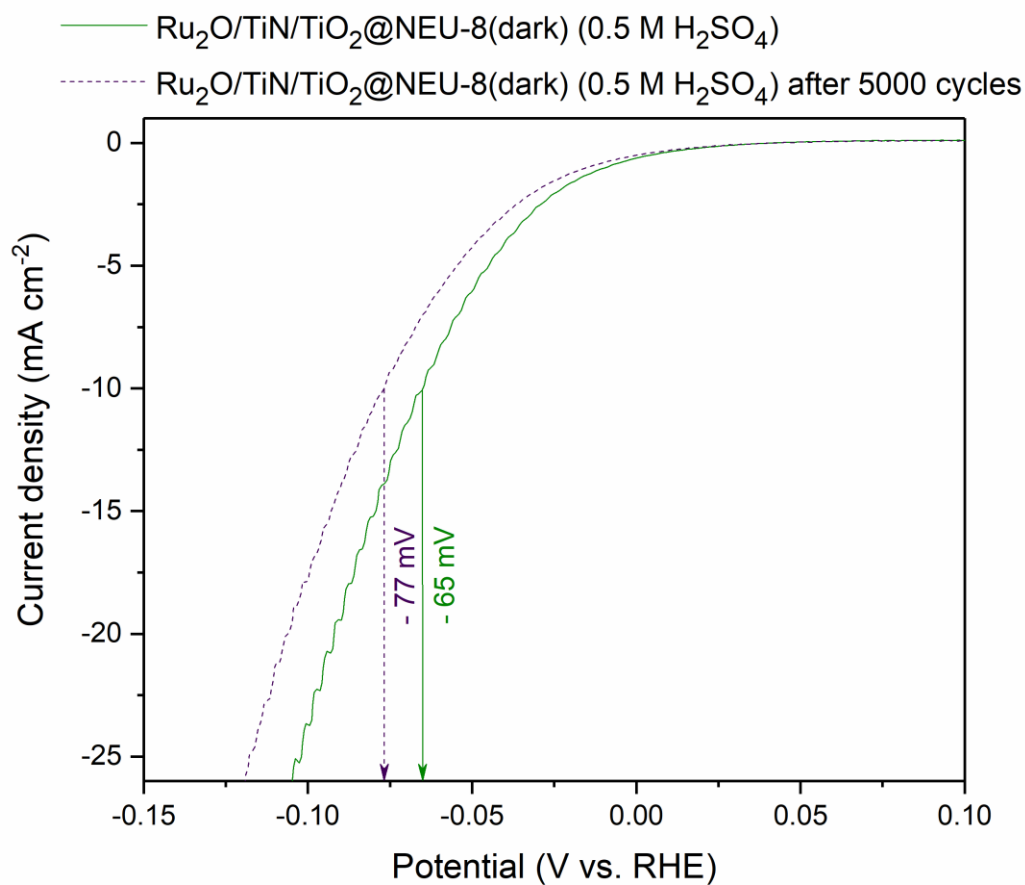

**Figure S60.** (a) XRD, (b) SEM and (c) TEM of Ru<sub>2</sub>O/TiN/TiO<sub>2</sub>@NEU-8 after the stability test in dark in H<sub>2</sub>-saturated 0.5 M H<sub>2</sub>SO<sub>4</sub> electrolyte.

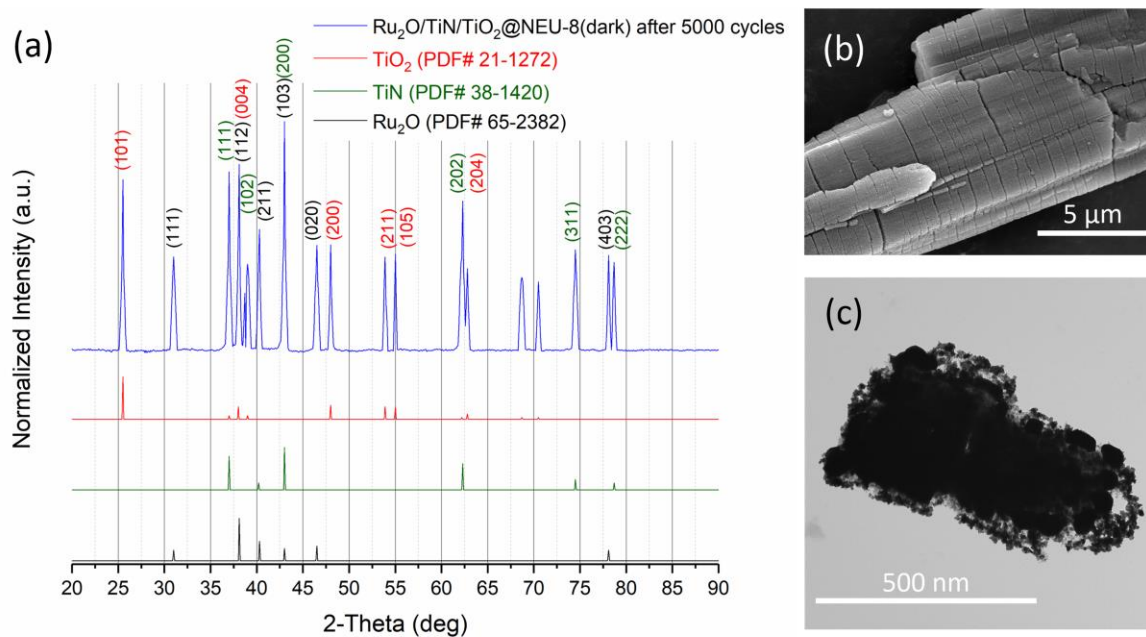

**Figure S61.** Polarization curves of Ru<sub>2</sub>O/TiN/TiO<sub>2</sub>@NEU-8 initially and after 5000 cyclic voltammetry sweeps in light. Recorded in H<sub>2</sub>-saturated 0.5 M H<sub>2</sub>SO<sub>4</sub> electrolyte, measured at a scan rate of 50 mV s<sup>-1</sup>. Catalyst loading: 0.285 mg cm<sup>-2</sup> (with iR compensation).

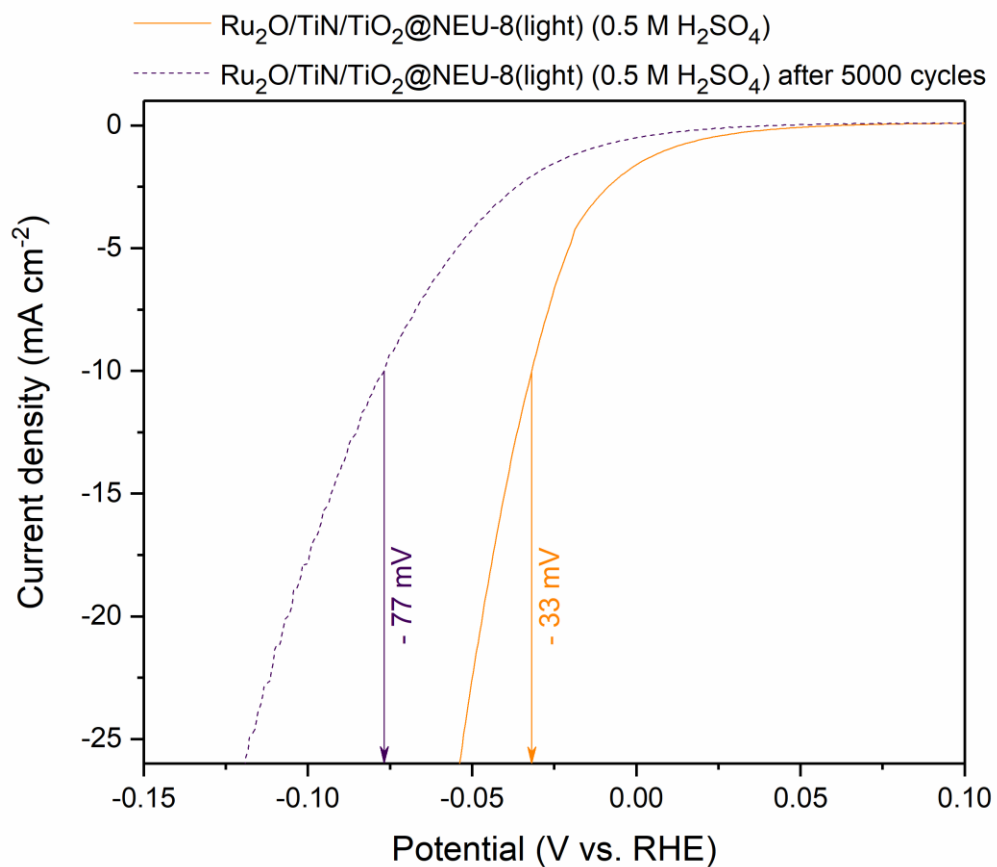

**Figure S62.** (a) XRD, (b) SEM and (c) TEM of Ru<sub>2</sub>O/TiN/TiO<sub>2</sub>@NEU-8 after the stability test in light in H<sub>2</sub>-saturated 0.5 M H<sub>2</sub>SO<sub>4</sub> electrolyte.

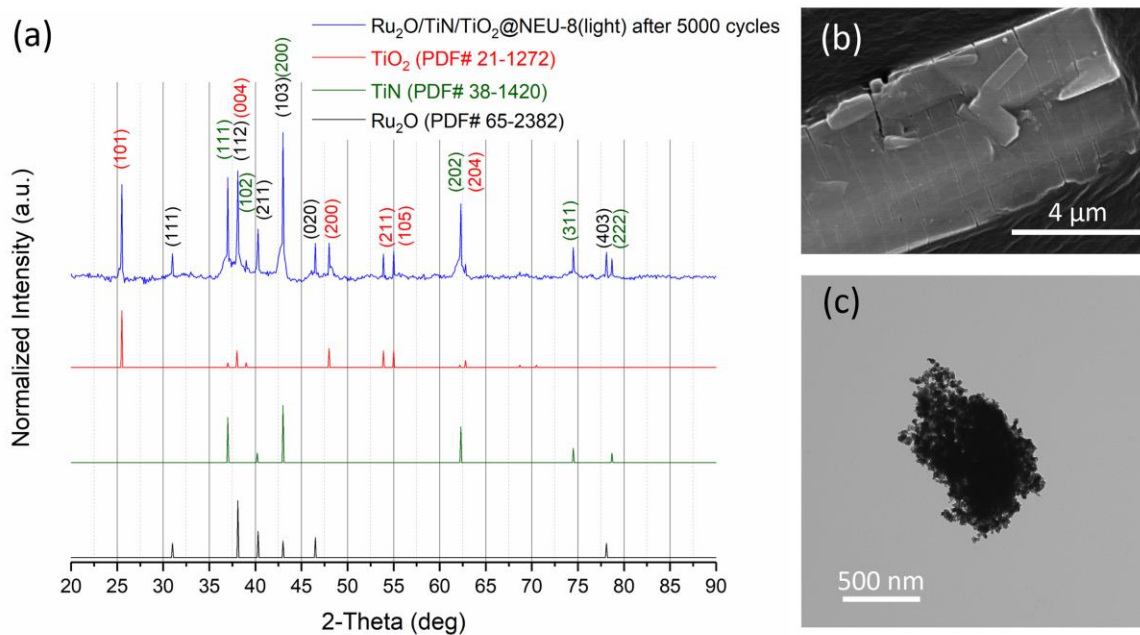

**Figure S63.** UV/Vis spectrum of NEU-8 and Ru<sub>2</sub>O/TiN/TiO<sub>2</sub>@NEU-8 recorded in DI water.

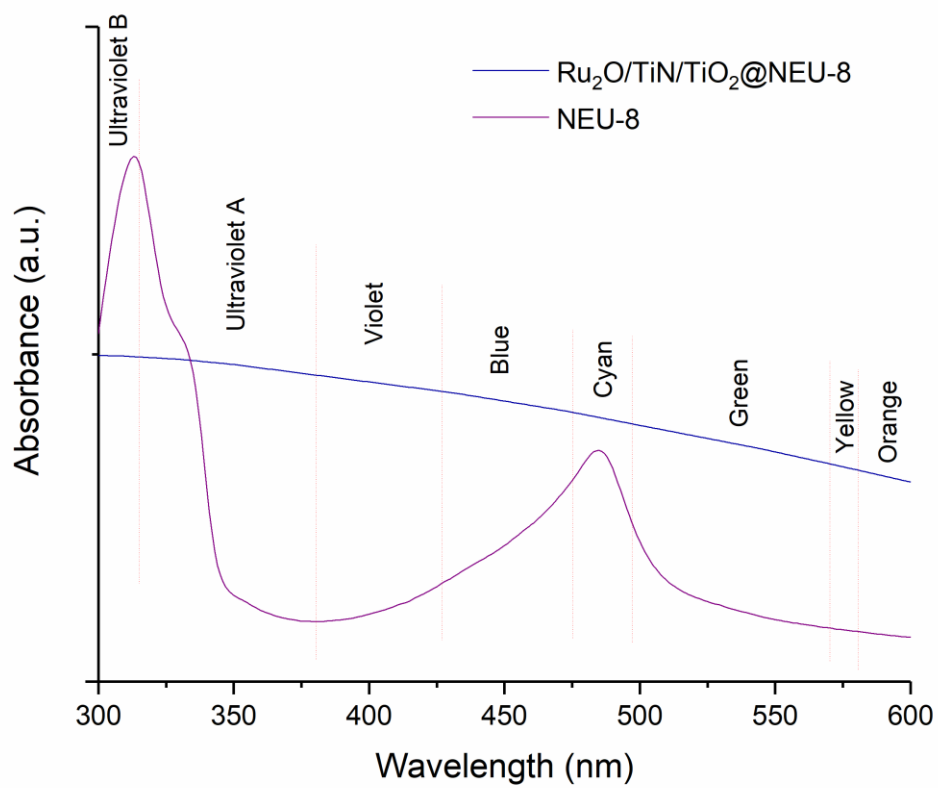

**Figure S64.** Comparison between trends in activities for the ORR, expressed as half-wave potential in acidic electrolyte.

- Monometallic MOF-derived ORR catalysts
- Metal doped MOF-based ORR catalysts
- Bimetallic MOF-derived ORR catalysts
- Single-atom catalysts

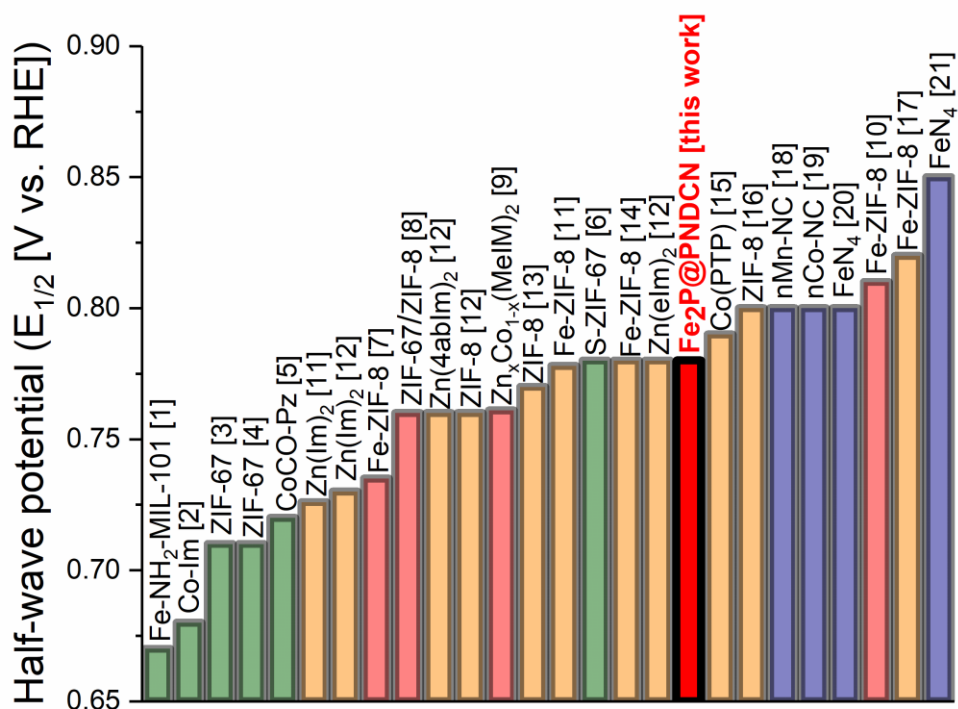

**Figure S65.** Comparison between trends in activities for the ORR, expressed as half-wave potential in basic electrolyte.

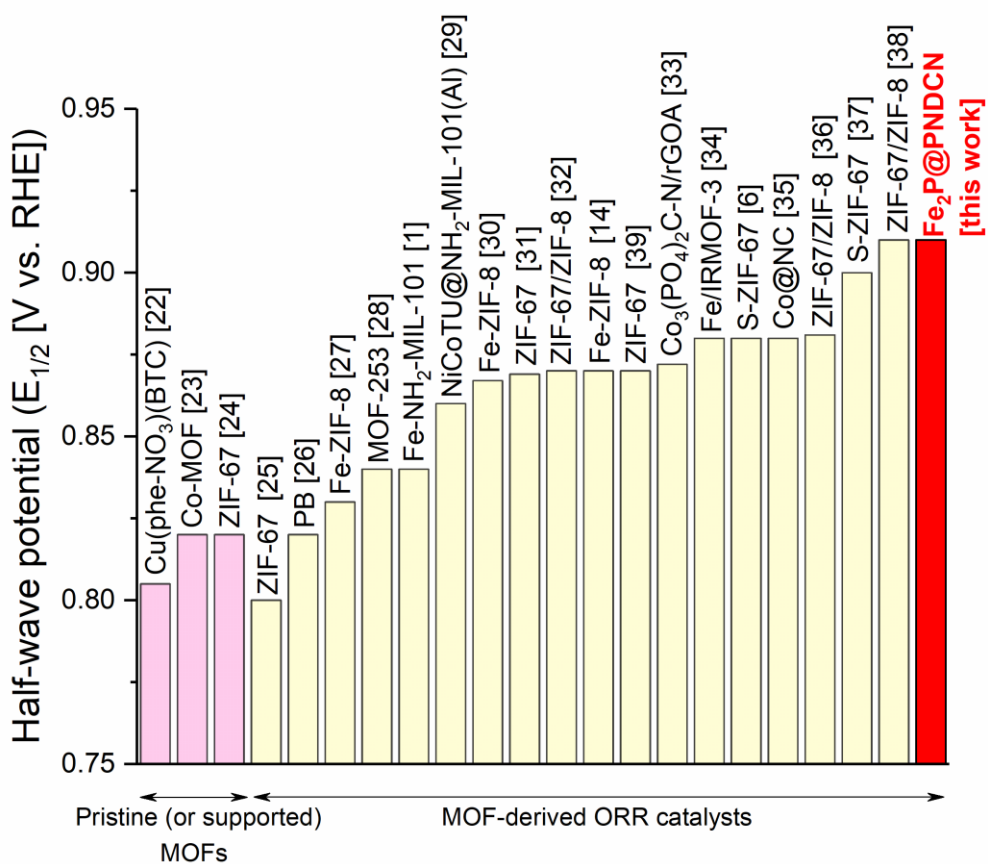

Figure S66. Comparison between trends in activities for the HER in acidic electrolyte.

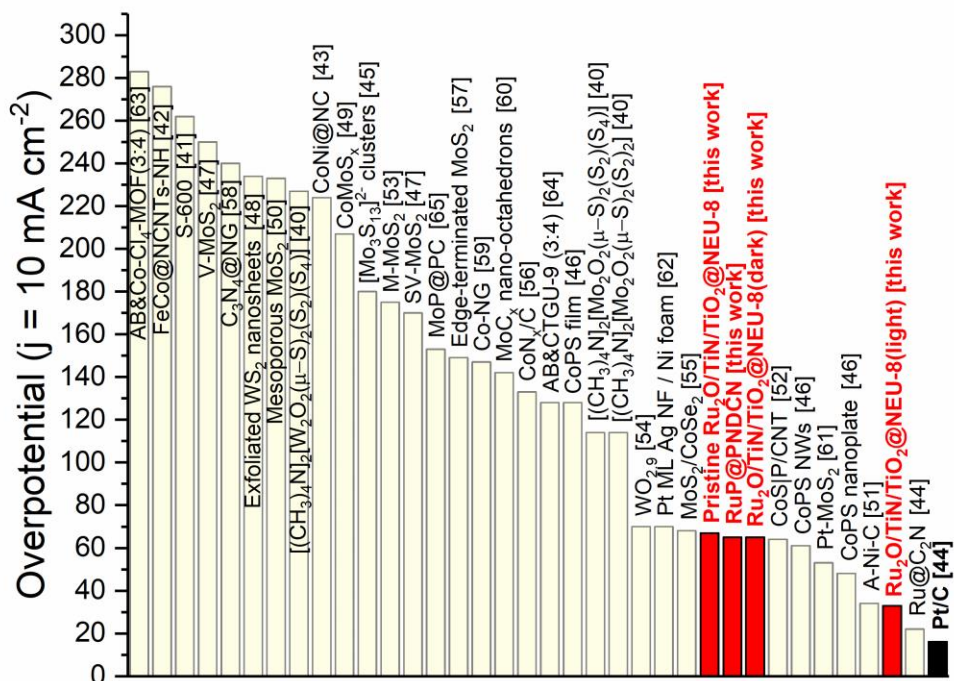



**Figure S67.** Comparison between trends in activities for the HER in basic electrolyte.

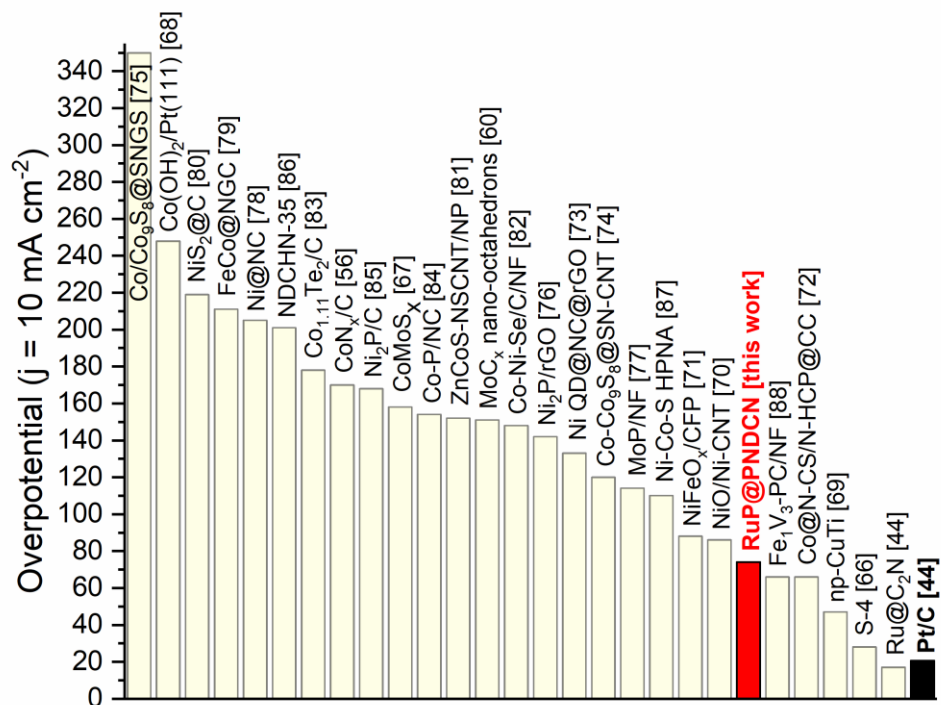

**Figure S68.** Comparison between trends in activities for the OER in acidic electrolyte.

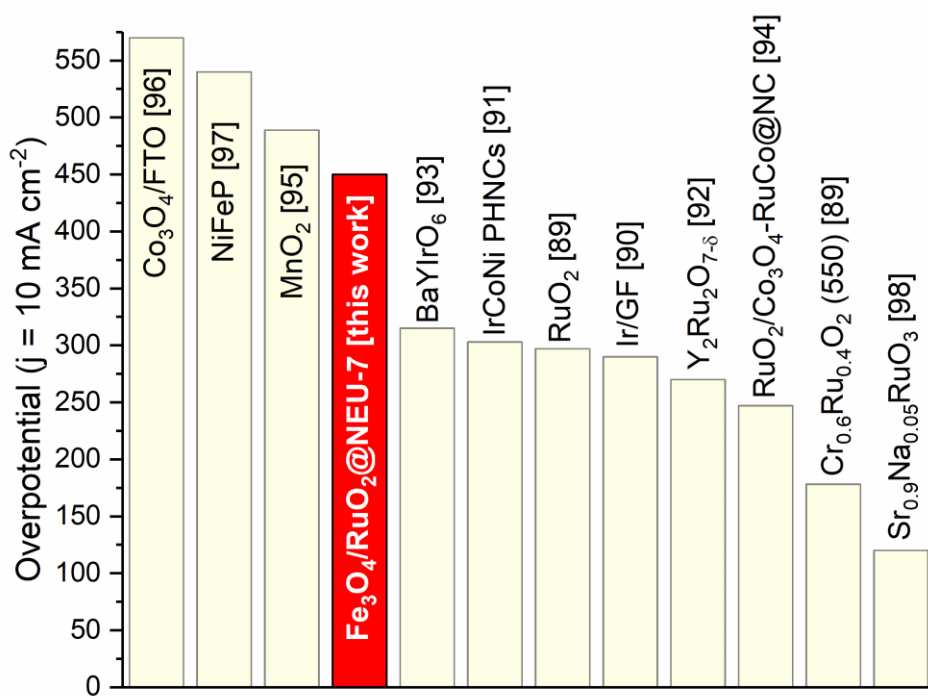

**Figure S69.** Comparison between trends in activities for the OER in basic electrolyte.

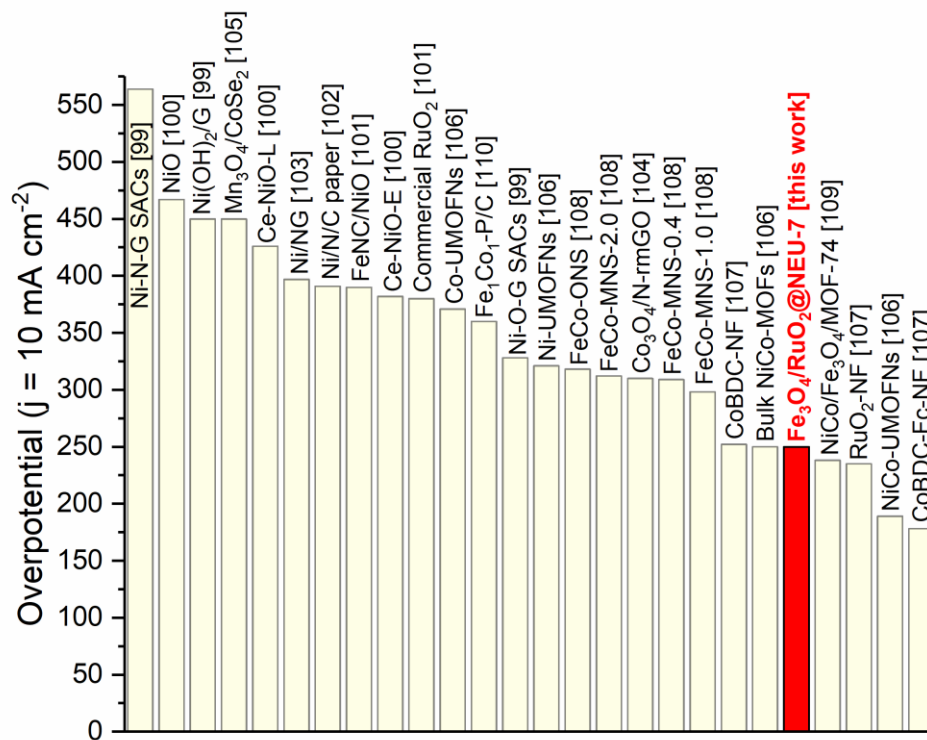

## 2. Supplementary Tables

**Table S1.** Summaries of the EXAFS fitting results of the NEU-5 to determine the local molecular structure of zinc within the MOF.

| Scattering                                          | R (Å)             | N | $\sigma^2$ (Å <sup>2</sup> ) |
|-----------------------------------------------------|-------------------|---|------------------------------|
| Zn-O <sub>43</sub>                                  | 1.81920 ± 0.15908 | 2 | 0.00911                      |
| Zn-O <sub>21</sub>                                  | 1.85390 ± 0.18984 | 1 | 0.00911                      |
| Zn-N <sub>1</sub>                                   | 1.91010 ± 0.05204 | 2 | 0.00911                      |
| Zn-O <sub>30</sub>                                  | 1.90480 ± 0.08131 | 1 | 0.00911                      |
| Zn-C <sub>20</sub>                                  | 2.03870 ± 0.09627 | 2 | 0.00911                      |
| Zn-C <sub>16</sub>                                  | 2.82960 ± 0.04593 | 1 | 0.00911                      |
| Zn-C <sub>14</sub>                                  | 2.86810 ± 0.25040 | 2 | 0.02092                      |
| Zn-H <sub>52</sub>                                  | 2.87280 ± 0.49990 | 2 | 0.02092                      |
| Zn-N <sub>15</sub> -C <sub>16</sub>                 | 3.05880 ± 0.05165 | 6 | 0.01003                      |
| Zn-C <sub>1</sub>                                   | 3.51750 ± 0.00389 | 2 | 0.01003                      |
| Zn-C <sub>20</sub> -C <sub>1</sub>                  | 3.51880 ± 0.01113 | 4 | 0.02629                      |
| Zn-C <sub>20</sub> -C <sub>1</sub> -C <sub>20</sub> | 3.52000 ± 0.10376 | 2 | 0.00382                      |
| Zn-O <sub>43</sub>                                  | 3.63840 ± 0.08736 | 2 | 0.00902                      |
| Zn-O <sub>43</sub> -C <sub>20</sub>                 | 3.76460 ± 0.15603 | 4 | 0.00200                      |
| Zn-O <sub>21</sub>                                  | 3.75870 ± 0.07232 | 2 | 0.02156                      |
| Zn-O <sub>21</sub> -C <sub>45</sub>                 | 3.80350 ± 0.07232 | 4 | 0.00208                      |

Fits were done at the Zn K-edge in R-space,  $k^{1,2,3}$  weighting.  $1.0 < R < 3.5$  Å and  $\Delta k = 3.000 - 12.896$  Å<sup>-1</sup> were used for fitting. The fitting result of the  $E_0$  and  $S_0^2$  are  $1.59962215 \pm 0.45005218$  eV and  $0.93216328 \pm 0.05304799$ , respectively. The goodness of the fit is reflected by  $\chi^2_\nu = 1250.11$  and R-factor = 0.0045642.

**Table S2.** Summaries of the EXAFS fitting results of the NEU-5 to determine the local molecular structure of iron within the MOF.

| Scattering                                           | R (Å)             | N  | $\sigma^2$ (Å <sup>2</sup> ) |
|------------------------------------------------------|-------------------|----|------------------------------|
| Fe-N <sub>4</sub>                                    | 1.85220 ± 0.05722 | 2  | 0.00116                      |
| Fe-N <sub>29</sub>                                   | 1.93410 ± 0.05722 | 4  | 0.00459                      |
| Fe-C <sub>36</sub>                                   | 2.77770 ± 0.05722 | 8  | 0.00575                      |
| Fe-C <sub>24</sub>                                   | 2.92430 ± 0.05722 | 4  | 0.02344                      |
| Fe-N <sub>4</sub> -C <sub>5</sub>                    | 2.98290 ± 0.05722 | 8  | 0.01927                      |
| Fe-H <sub>52</sub>                                   | 3.02150 ± 0.05722 | 4  | 0.01927                      |
| Fe-N <sub>29</sub> -C <sub>28</sub>                  | 3.03950 ± 0.05722 | 8  | 0.01927                      |
| Fe-N <sub>15</sub> -C <sub>16</sub>                  | 3.09540 ± 0.05722 | 8  | 0.01927                      |
| Fe-N <sub>4</sub> -N <sub>15</sub>                   | 3.13040 ± 0.05722 | 8  | 0.01927                      |
| Fe-N <sub>4</sub> -C <sub>5</sub> -N <sub>4</sub>    | 3.19820 ± 0.05722 | 4  | 0.01927                      |
| Fe-N <sub>15</sub> -C <sub>16</sub> -N <sub>15</sub> | 3.26660 ± 0.05722 | 4  | 0.01927                      |
| Fe-N <sub>15</sub> -C <sub>14</sub> -N <sub>15</sub> | 3.29130 ± 0.05722 | 4  | 0.01927                      |
| Fe-N <sub>29</sub> -N <sub>11</sub>                  | 3.31630 ± 0.05722 | 8  | 0.01927                      |
| Fe-N <sub>4</sub> -N <sub>32</sub>                   | 3.32670 ± 0.05722 | 8  | 0.01927                      |
| Fe-N <sub>4</sub> -C <sub>14</sub>                   | 3.47380 ± 0.05722 | 8  | 0.01927                      |
| Fe-C <sub>36</sub> -C <sub>28</sub>                  | 3.50010 ± 0.05722 | 8  | 0.01927                      |
| Fe-N <sub>29</sub> -C <sub>36</sub>                  | 3.52120 ± 0.05722 | 8  | 0.01927                      |
| Fe-N <sub>4</sub> -N <sub>25</sub>                   | 3.70440 ± 0.05722 | 2  | 0.01927                      |
| Fe-N <sub>4</sub>                                    | 3.70440 ± 0.05722 | 2  | 0.01927                      |
| Fe-N <sub>15</sub> -N <sub>11</sub>                  | 3.84740 ± 0.05722 | 4  | 0.01927                      |
| Fe-N <sub>29</sub>                                   | 3.86830 ± 0.05722 | 4  | 0.01927                      |
| Fe-N <sub>15</sub>                                   | 3.86830 ± 0.05722 | 4  | 0.01927                      |
| Fe-N <sub>4</sub> -C <sub>31</sub>                   | 3.93010 ± 0.05722 | 8  | 0.01927                      |
| Fe-C <sub>14</sub> -C <sub>16</sub>                  | 4.01640 ± 0.05722 | 8  | 0.01927                      |
| Fe-C <sub>37</sub>                                   | 4.06710 ± 0.05722 | 4  | 0.01927                      |
| Fe-C <sub>36</sub> -C <sub>37</sub>                  | 4.10750 ± 0.05722 | 8  | 0.01927                      |
| Fe-C <sub>5</sub> -N <sub>4</sub> -C <sub>5</sub>    | 4.11370 ± 0.05722 | 4  | 0.01927                      |
| Fe-C <sub>27</sub>                                   | 4.11490 ± 0.05722 | 4  | 0.01927                      |
| Fe-N <sub>32</sub> -C <sub>14</sub>                  | 4.12380 ± 0.05722 | 18 | 0.01927                      |
| Fe-N <sub>35</sub> -C <sub>37</sub>                  | 4.14090 ± 0.05722 | 8  | 0.01927                      |
| Fe-N <sub>11</sub> -C <sub>36</sub>                  | 4.14190 ± 0.05722 | 14 | 0.01927                      |
| Fe-C <sub>28</sub> -C <sub>27</sub>                  | 4.14180 ± 0.05722 | 8  | 0.01927                      |
| Fe-C <sub>5</sub> -N <sub>4</sub> -C <sub>5</sub>    | 4.14480 ± 0.05722 | 4  | 0.01927                      |
| Fe-C <sub>36</sub> -C <sub>37</sub> -C <sub>36</sub> | 4.14790 ± 0.05722 | 4  | 0.01927                      |
| Fe-N <sub>29</sub> -C <sub>10</sub>                  | 4.15510 ± 0.05722 | 16 | 0.01927                      |
| Fe-C <sub>28</sub> -C <sub>27</sub> -C <sub>28</sub> | 4.16860 ± 0.05722 | 4  | 0.01927                      |
| Fe-C <sub>25</sub>                                   | 4.20990 ± 0.05722 | 4  | 0.01927                      |
| Fe-N <sub>35</sub> -C <sub>37</sub> -N <sub>35</sub> | 4.21460 ± 0.05722 | 4  | 0.01927                      |
| Fe-N <sub>29</sub> -C <sub>27</sub>                  | 4.21800 ± 0.05722 | 8  | 0.01927                      |
| Fe-N <sub>15</sub> -C <sub>3</sub>                   | 4.25400 ± 0.05722 | 8  | 0.01927                      |
| Fe-C <sub>24</sub> -C <sub>25</sub>                  | 4.25700 ± 0.05722 | 8  | 0.01927                      |
| Fe-C <sub>16</sub> -N <sub>15</sub> -C <sub>16</sub> | 4.25680 ± 0.05722 | 4  | 0.01927                      |
| Fe-N <sub>29</sub> -C <sub>25</sub>                  | 4.25780 ± 0.05722 | 8  | 0.01927                      |

|                                                      |                   |   |         |
|------------------------------------------------------|-------------------|---|---------|
| Fe-N <sub>4</sub> -C <sub>16</sub>                   | 4.28920 ± 0.05722 | 8 | 0.01927 |
| Fe-C <sub>16</sub> -C <sub>17</sub> -C <sub>16</sub> | 4.30410 ± 0.05722 | 4 | 0.01927 |
| Fe-N <sub>29</sub> -C <sub>25</sub> -N <sub>29</sub> | 4.30560 ± 0.05722 | 4 | 0.01927 |
| Fe-N <sub>29</sub> -C <sub>27</sub> -N <sub>29</sub> | 4.32120 ± 0.05722 | 4 | 0.01927 |
| Fe-N <sub>4</sub> -C <sub>15</sub> -N <sub>4</sub>   | 3.02150 ± 0.05722 | 4 | 0.01927 |

Fits were done at the Fe K-edge in R-space,  $k^{1.2.3}$  weighting.  $1.0 < R < 3.8 \text{ \AA}$  and  $\Delta k = 3.000 - 12.821 \text{ \AA}^{-1}$  were used for fitting. The fitting result of the  $E_0$  and  $S_0^2$  are  $-3.17785465 \pm 1.38773601 \text{ eV}$  and  $0.66889769 \pm 0.08181721$ , respectively. The goodness of the fit is reflected by  $\chi^2 = 245.67$  and R-factor = 0.0182571.

**Table S3.** BET surface area and total pore volume of NEU-5, NEU-6, NEU-7 and NEU-8, as well as Fe<sub>2</sub>P@PNDCN, RuP@PNDCN, Fe<sub>3</sub>O<sub>4</sub>/RuO<sub>2</sub>@NEU-7 and Ru<sub>2</sub>O/TiN/TiO<sub>2</sub>@NEU-8.

| Sample                                                  | BET<br>m <sup>2</sup> g <sup>-1</sup> | Total pore volume<br>cm <sup>3</sup> g <sup>-1</sup> |
|---------------------------------------------------------|---------------------------------------|------------------------------------------------------|
| NEU-5                                                   | 10.2                                  | 0.027                                                |
| NEU-6                                                   | 18.2                                  | 0.162                                                |
| NEU-7                                                   | 174.2                                 | 0.262                                                |
| NEU-8                                                   | 244.2                                 | 0.305                                                |
| Fe <sub>2</sub> P@PNDCN                                 | 681.4                                 | 0.633                                                |
| RuP@PNDCN                                               | 126.5                                 | 0.180                                                |
| Fe <sub>3</sub> O <sub>4</sub> /RuO <sub>2</sub> @NEU-7 | 92.0                                  | 0.255                                                |
| Ru <sub>2</sub> O/TiN/TiO <sub>2</sub> @NEU-8           | 112.1                                 | 0.126                                                |

**Table S4.** Reported catalysts for ORR in acidic electrolyte.

| Monometallic MOF-derived ORR catalysts                                     |                                            |                                          |                       |                       |                  |
|----------------------------------------------------------------------------|--------------------------------------------|------------------------------------------|-----------------------|-----------------------|------------------|
| Name/Other precursors                                                      | Heat treatment temperature (°C)            | Electrolyte                              | E <sub>onset</sub>    | E <sub>1/2</sub>      | Reference        |
| Fe-NH <sub>2</sub> -MIL-101                                                | 700                                        | 0.5 M H <sub>2</sub> SO <sub>4</sub>     | 0.92 V vs. RHE        | 0.67 V vs. RHE        | [1]              |
| Co-Im = Co-Imidazolate                                                     | 750                                        | 0.1 M HClO <sub>4</sub>                  | 0.83 V vs. RHE        | 0.68 V vs. RHE        | [2]              |
| ZIF-67 = Co-mIm                                                            | 750                                        | 0.1 M HClO <sub>4</sub>                  | 0.86 V vs. RHE        | 0.71 V vs. RHE        | [3]              |
| ZIF-67 = Co-mIm                                                            | 900                                        | 0.5 M H <sub>2</sub> SO <sub>4</sub>     | 0.85 V vs. RHE        | 0.71 V vs. RHE        | [4]              |
| CoCO-Pz = Co-pyrazinedicarboxylate                                         | 700                                        | 0.5 M H <sub>2</sub> SO <sub>4</sub>     | 0.97 V vs. RHE        | 0.72 V vs. RHE        | [5]              |
| S-ZIF-67 = Co-mIm-S                                                        | 700                                        | 0.1 M HClO <sub>4</sub>                  | 0.90 V vs. RHE        | 0.78 V vs. RHE        | [6]              |
| Bimetallic MOF-derived ORR catalysts                                       |                                            |                                          |                       |                       |                  |
| Fe-ZIF-8 = Fe-Zn-mIm                                                       | 900                                        | 0.5 M H <sub>2</sub> SO <sub>4</sub>     | 0.861 V vs. RHE       | 0.735 V vs. RHE       | [7]              |
| ZIF-67/ZIF-8                                                               | 1. 1000 (Ar) 2. 950 (NH <sub>3</sub> )     | 0.1 M HClO <sub>4</sub>                  | 0.93 V vs. RHE        | 0.76 V vs. RHE        | [8]              |
| Zn <sub>x</sub> Co <sub>1-x</sub> (MeIM) <sub>2</sub>                      | 900                                        | 0.1 M HClO <sub>4</sub>                  | ---                   | 0.761 V vs. RHE       | [9]              |
| <b>Fe<sub>2</sub>P@PND CN</b>                                              | <b>1050</b>                                | <b>0.5 M H<sub>2</sub>SO<sub>4</sub></b> | <b>0.88 V vs. RHE</b> | <b>0.78 V vs. RHE</b> | <b>This work</b> |
| <b>Fe<sub>2</sub>P@PND CN</b>                                              | <b>1050</b>                                | <b>0.1 M HClO<sub>4</sub></b>            | <b>0.89 V vs. RHE</b> | <b>0.78 V vs. RHE</b> | <b>This work</b> |
| Fe-ZIF-8 = Fe-Zn-mIm                                                       | 950                                        | 0.1 M HClO <sub>4</sub>                  | 0.95 V vs. RHE        | 0.81 V vs. RHE        | [10]             |
| Metal doped MOFs-based ORR catalysts                                       |                                            |                                          |                       |                       |                  |
| Zn(Im) <sub>2</sub> /Tris-1,10-phenanthroline and iron (II) perchlorate    | 1050                                       | 0.1 M HClO <sub>4</sub>                  | 0.88 V vs. RHE        | 0.726 V vs. RHE       | [11]             |
| Fe-ZIF-8 = Fe-Zn-mIm/Tris-1,10-phenanthroline and iron (II) perchlorate    | 1. 1050 (Ar)<br>2. 1050 (NH <sub>3</sub> ) | 0.1 M HClO <sub>4</sub>                  | 0.91 V vs. RHE        | 0.778 V vs. RHE       | [11]             |
| Zn(Im) <sub>2</sub> /Tris-1,10-phenanthroline and iron (II) perchlorate    | 1. 1050 (Ar)<br>2. 950 (NH <sub>3</sub> )  | 0.1 M HClO <sub>4</sub>                  | 0.881 V vs. RHE       | 0.73 V vs. RHE        | [12]             |
| Zn(4abIm) <sub>2</sub> /Tris-1,10-phenanthroline and iron (II) perchlorate | 1. 1050 (Ar)<br>2. 950 (NH <sub>3</sub> )  | 0.1 M HClO <sub>4</sub>                  | 0.904 V vs. RHE       | 0.76 V vs. RHE        | [12]             |
| ZIF-8/Tris-1,10-phenanthroline and iron (II) perchlorate                   | 1. 1050 (Ar)<br>2. 950 (NH <sub>3</sub> )  | 0.1 M HClO <sub>4</sub>                  | 0.902 V vs. RHE       | 0.76 V vs. RHE        | [12]             |
| Zn(eIm) <sub>2</sub> /Tris-1,10-phenanthroline and iron (II) perchlorate   | 1. 1050 (Ar)<br>2. 950 (NH <sub>3</sub> )  | 0.1 M HClO <sub>4</sub>                  | 0.914 V vs. RHE       | 0.78 V vs. RHE        | [12]             |
| ZIF-8/1,10-phenanthroline and iron (II) acetate                            | 1. 1050 (Ar)<br>2. 1050 (NH <sub>3</sub> ) | 0.1 M HClO <sub>4</sub>                  | 0.93 V vs. RHE        | 0.77 V vs. RHE        | [13]             |
| Fe-ZIF-8 = Fe-Zn-mIm/1,10-phenanthroline and iron (II) acetate             | 1. 1050 (Ar)<br>2. 1050 (NH <sub>3</sub> ) | 0.1 M HClO <sub>4</sub>                  | 0.98 V vs. RHE        | 0.78 V vs. RHE        | [14]             |
| Co(PTP)/ Dicyandiamide and Iron acetate (II)                               | 1000                                       | 0.5 M H <sub>2</sub> SO <sub>4</sub>     | 0.95 V vs. RHE        | 0.79 V vs. RHE        | [15]             |
| ZIF-8/Tris-1,10-phenanthroline and iron (II) perchlorate                   | 1. 1000 (Ar)<br>2. 900 (NH <sub>3</sub> )  | 0.5 M H <sub>2</sub> SO <sub>4</sub>     | 0.93 V vs. RHE        | 0.80 V vs. RHE        | [16]             |
| Fe-ZIF-8                                                                   | 1000 (Ar)                                  | 0.1 M HClO <sub>4</sub>                  | 0.95 V vs. RHE        | 0.82 V vs. RHE        | [17]             |
| Metal doped MOFs-based ORR catalysts                                       |                                            |                                          |                       |                       |                  |
| nMn-NC/Mn-doped ZIF-8                                                      | 1100                                       | 0.5 M H <sub>2</sub> SO <sub>4</sub>     | ---                   | 0.80 V vs. RHE        | [18]             |
| nCo-NC/nCo-ZIF-8                                                           | 1100                                       | 0.5 M H <sub>2</sub> SO <sub>4</sub>     | ---                   | 0.80 V vs. RHE        | [19]             |



|                                                                                                                         |                       |                                      |     |                |      |
|-------------------------------------------------------------------------------------------------------------------------|-----------------------|--------------------------------------|-----|----------------|------|
| FeN <sub>4</sub> embedded into the carbon planes/<br>Cyanamide, FeCl <sub>3</sub> , Carbon (Black<br>Pearls 2000), PANI | 900 (N <sub>2</sub> ) | 0.5 M H <sub>2</sub> SO <sub>4</sub> | --- | 0.80 V vs. RHE | [20] |
| FeN <sub>4</sub> embedded into the carbon planes/<br>Fe-ZIF                                                             | 1100                  | 0.5 M H <sub>2</sub> SO <sub>4</sub> | --- | 0.85 V vs. RHE | [21] |

**Table S5.** Reported catalysts for ORR in alkaline electrolyte.

| Supported or pristine MOF ORR catalysts                          |                            |             |                    |                  |           |
|------------------------------------------------------------------|----------------------------|-------------|--------------------|------------------|-----------|
| Name                                                             | Support                    | Electrolyte | E <sub>onset</sub> | E <sub>1/2</sub> | Reference |
| Cu(phen-NO <sub>3</sub> )(BTC) =<br>Cu(nitrophenanthroline)(BTC) | CNTs@TiO <sub>2</sub>      | 0.1 M KOH   | 0.988 V vs. RHE    | 0.805 V vs. RHE  | [22]      |
| Co-MOF = Co-benzimidazolates                                     | CNTs                       | 0.1 M KOH   | 0.91 V vs. RHE     | 0.82 V vs. RHE   | [23]      |
| ZIF-67 = Co-methyl-imidazolates                                  | pomelo-peel-derived carbon | 0.1 M KOH   | ---                | 0.82 V vs. RHE   | [24]      |

  

| MOF-derived ORR catalysts                                                                                                                                                   |                                         |                |                       |                       |                  |
|-----------------------------------------------------------------------------------------------------------------------------------------------------------------------------|-----------------------------------------|----------------|-----------------------|-----------------------|------------------|
| Name                                                                                                                                                                        | Heat treatment temperature<br>(°C)      | Electrolyte    | E <sub>onset</sub>    | E <sub>1/2</sub>      | Reference        |
| ZIF-67 = Co-mIm                                                                                                                                                             | 700                                     | 0.1 M KOH      | 0.97 V vs. RHE        | 0.87 V vs. RHE        | [39]             |
| Fe-NH <sub>2</sub> -MIL-101                                                                                                                                                 | 700                                     | 0.1 M KOH      | 0.99 V vs. RHE        | 0.84 V vs. RHE        | [1]              |
| S-ZIF-67 = Co-mIm-S                                                                                                                                                         | 700                                     | 0.1 M KOH      | 0.98 V vs. RHE        | 0.88 V vs. RHE        | [6]              |
| Fe-ZIF-8 = Fe-Zn-mIm                                                                                                                                                        | 1. 1050 (Ar) 2. 1050 (NH <sub>3</sub> ) | 0.1 M KOH      | 1.05 V vs. RHE        | 0.87 V vs. RHE        | [14]             |
| ZIF-67 = Co-mIm                                                                                                                                                             | 900                                     | 0.1 M KOH      | 0.94 V vs. RHE        | 0.8 V vs. RHE         | [25]             |
| PB = Prussian blue                                                                                                                                                          | 800                                     | 0.1 M KOH      | 0.95 V vs. RHE        | 0.82 V vs. RHE        | [26]             |
| Fe-ZIF-8 = Fe-pyrrole-Zn-mIm                                                                                                                                                | 800                                     | 0.1 M KOH      | 0.96 V vs. RHE        | 0.83 V vs. RHE        | [27]             |
| MOF-253 = Fe-Al(OH)(bpydc)                                                                                                                                                  | 900                                     | 0.1 M KOH      | 0.98 V vs. RHE        | 0.84 V vs. RHE        | [28]             |
| NiCoTU@NH <sub>2</sub> -MIL-101(Al) = NiCo-thiourea-NH <sub>2</sub> -MIL-101(Al)                                                                                            | 900                                     | 0.1 M KOH      | 0.94 V vs. RHE        | 0.86 V vs. RHE        | [29]             |
| Fe-ZIF-8 = Fe-Zn-mIm                                                                                                                                                        | 950                                     | 0.1 M KOH      | 0.975 V vs. RHE       | 0.867 V vs. RHE       | [30]             |
| ZIF-67 = Co-mIm                                                                                                                                                             | 800                                     | 0.1 M KOH      | 0.938 V vs. RHE       | 0.869 V vs. RHE       | [31]             |
| ZIF-67/ZIF-8 = Co-mIm/Zn-mIm                                                                                                                                                | 950                                     | 0.1 M KOH      | 1.0 V vs. RHE         | 0.87 V vs. RHE        | [32]             |
| Co <sub>3</sub> (PO <sub>4</sub> ) <sub>2</sub> C-N/rGOA = Co <sub>3</sub> (O <sub>3</sub> PCH <sub>2</sub> -NC <sub>4</sub> H <sub>7</sub> -CO <sub>2</sub> ) <sub>2</sub> | 800                                     | 0.1 M KOH      | 0.968 V vs. RHE       | 0.872 V vs. RHE       | [33]             |
| Fe/IRMOF-3 = Fe(Zn-NH <sub>2</sub> -BDC)                                                                                                                                    | 900                                     | 0.1 M KOH      | 1.02 V vs. RHE        | 0.88 V vs. RHE        | [34]             |
| Co@NC                                                                                                                                                                       | 900                                     | 0.1 M KOH      | 0.97 V vs. RHE        | 0.88 V vs. RHE        | [35]             |
| ZIF-67/ZIF-8 = Co-mIm/Zn-mIm                                                                                                                                                | 900                                     | 0.1 M KOH      | 0.982 V vs. RHE       | 0.881 V vs. RHE       | [36]             |
| S-ZIF-67 = Co-mIm-S                                                                                                                                                         | 700                                     | 0.1 M KOH      | 0.97 V vs. RHE        | 0.9 V vs. RHE         | [37]             |
| ZIF-67/ZIF-8 = Co-mIm/Zn-mIm                                                                                                                                                | 850                                     | 0.1 M KOH      | 0.992 V vs. RHE       | 0.91 V vs. RHE        | [38]             |
| <b>Fe<sub>2</sub>P@PNDCN</b>                                                                                                                                                | <b>1050</b>                             | <b>1 M KOH</b> | <b>0.95 V vs. RHE</b> | <b>0.91 V vs. RHE</b> | <b>This work</b> |

**Table S6.** Reported catalysts for HER in acidic electrolyte.

| Name                                                                                         | Electrolyte                                     | Catalyst Loading                         | Overpotential<br>( $j = 10 \text{ mA cm}^{-2}$ )<br>(mV) | Tafel slope<br>( $\text{mV dec}^{-1}$ ) | Overpotential<br>( $j = 10 \text{ mA cm}^{-2}$ )<br>after certain cycles | Reference        |
|----------------------------------------------------------------------------------------------|-------------------------------------------------|------------------------------------------|----------------------------------------------------------|-----------------------------------------|--------------------------------------------------------------------------|------------------|
| $[(\text{CH}_3)_4\text{N}]_2[\text{Mo}_2\text{O}_2(\mu\text{-S})_2(\text{S}_2)_2]$           | 1 M $\text{H}_2\text{SO}_4$                     | 2.85 $\mu\text{mol/cm}^2$                | $114 \pm 3$                                              | 52                                      | 132, 1000th                                                              | [40]             |
| $[(\text{CH}_3)_4\text{N}]_2[\text{Mo}_2\text{O}_2(\mu\text{-S})_2(\text{S}_2)(\text{S}_4)]$ | 1 M $\text{H}_2\text{SO}_4$                     | 2.85 $\mu\text{mol/cm}^2$                | $114 \pm 2$                                              | 55                                      | About 140, 1000th                                                        | [40]             |
| $[(\text{CH}_3)_4\text{N}]_2[\text{W}_2\text{O}_2(\mu\text{-S})_2(\text{S}_2)(\text{S}_4)]$  | 1 M $\text{H}_2\text{SO}_4$                     | 2.85 $\mu\text{mol/cm}^2$                | $227 \pm 2$                                              | 100                                     | About 235, 1000th                                                        | [40]             |
| S-600                                                                                        | 0.1 M $\text{H}_2\text{SO}_4$                   | 0.285 $\text{mg/cm}^2$                   | 262                                                      | 74                                      | 276, 2000th;<br>286, 10000th                                             | [41]             |
| FeCo@NCNTs-NH                                                                                | 0.1 M $\text{H}_2\text{SO}_4$                   | 0.32 $\text{mg/cm}^2$                    | 276                                                      | 96                                      | About 350, 10 000th                                                      | [42]             |
| CoNi@NC (475 °C)                                                                             | 0.1 M $\text{H}_2\text{SO}_4$                   | 0.32 $\text{mg/cm}^2$                    | 224                                                      | 104                                     | About 260, 1000th                                                        | [43]             |
| Ru@C <sub>2</sub> N                                                                          | 0.5 M $\text{H}_2\text{SO}_4$                   | 0.285 $\text{mg/cm}^2$                   | 22                                                       | 30                                      | 13.5, 10000th                                                            | [44]             |
| Pt/C                                                                                         | 0.5 M $\text{H}_2\text{SO}_4$                   | 0.285 $\text{mg/cm}^2$                   | 16                                                       | 27                                      | About 55, 10000th                                                        | [44]             |
| $[\text{Mo}_5\text{S}_{13}]^{2-}$ clusters                                                   | 0.5 M $\text{H}_2\text{SO}_4$                   | 0.100 $\text{mg/cm}^2$                   | 180                                                      | 40                                      | About 195, 1000th                                                        | [45]             |
| CoPS nanoplate                                                                               | 0.5 M $\text{H}_2\text{SO}_4$                   | ---                                      | 48                                                       | 56                                      | ---                                                                      | [46]             |
| CoPS NWs                                                                                     | 0.5 M $\text{H}_2\text{SO}_4$                   | ---                                      | 61                                                       | 48                                      | ---                                                                      | [46]             |
| CoPS film                                                                                    | 0.5 M $\text{H}_2\text{SO}_4$                   | ---                                      | 128                                                      | 57                                      | ---                                                                      | [46]             |
| SV-MoS <sub>2</sub>                                                                          | 0.5 M $\text{H}_2\text{SO}_4$                   | ---                                      | 170                                                      | 60                                      | ---                                                                      | [47]             |
| V-MoS <sub>2</sub>                                                                           | 0.5 M $\text{H}_2\text{SO}_4$                   | ---                                      | 250                                                      | 82                                      | ---                                                                      | [47]             |
| Exfoliated WS <sub>2</sub> nanosheets                                                        | 0.5 M $\text{H}_2\text{SO}_4$                   | 6.5 $\mu\text{g/cm}^2$                   | About 234                                                | 55                                      | ---                                                                      | [48]             |
| CoMoS <sub>x</sub>                                                                           | 0.1 M $\text{HClO}_4$                           | 50 $\mu\text{g/cm}^2$                    | About 207                                                | ---                                     | ---                                                                      | [49]             |
| Mesoporous MoS <sub>2</sub>                                                                  | 0.5 M $\text{H}_2\text{SO}_4$                   | 60 $\mu\text{g/cm}^2$                    | About 233                                                | 50                                      | ---                                                                      | [50]             |
| A-Ni-C                                                                                       | 0.5 M $\text{H}_2\text{SO}_4$                   | 0.283 $\text{mg/cm}^2$                   | 34                                                       | 41                                      | About 45, 8000th                                                         | [51]             |
| CoS P/CNT                                                                                    | 0.5 M $\text{H}_2\text{SO}_4$                   | 1.6 $\text{mg/cm}^2$                     | 64                                                       | 55                                      | About 80, 2000th                                                         | [52]             |
| M-MoS <sub>2</sub>                                                                           | 0.5 M $\text{H}_2\text{SO}_4$                   | 43 $\mu\text{g/cm}^2$                    | 175                                                      | 41                                      | About 180, 1000th                                                        | [53]             |
| WO <sub>2.9</sub>                                                                            | 0.5 M $\text{H}_2\text{SO}_4$                   | 0.285 $\text{mg/cm}^2$                   | 70                                                       | 50                                      | About 70, 1000th                                                         | [54]             |
| MoS <sub>2</sub> /CoSe <sub>2</sub>                                                          | 0.5 M $\text{H}_2\text{SO}_4$                   | 0.285 $\text{mg/cm}^2$                   | 68                                                       | 36                                      | ---                                                                      | [55]             |
| CoN <sub>x</sub> /C                                                                          | 0.5 M $\text{H}_2\text{SO}_4$                   | 2 $\text{mg/cm}^2$                       | 133                                                      | 57                                      | 144, 5000th                                                              | [56]             |
| Edge-terminated MoS <sub>2</sub>                                                             | 0.5 M $\text{H}_2\text{SO}_4$                   | 0.28 $\text{mg/cm}^2$                    | 149                                                      | 49                                      | About 155, 3000th                                                        | [57]             |
| C <sub>3</sub> N <sub>4</sub> @NG                                                            | 0.5 M $\text{H}_2\text{SO}_4$                   | 0.1 $\text{mg/cm}^2$                     | 240                                                      | 51.5                                    | About 250, 1000th                                                        | [58]             |
| Co-NG                                                                                        | 0.5 M $\text{H}_2\text{SO}_4$                   | 0.285 $\text{mg/cm}^2$                   | 147                                                      | 82                                      | About 155, 1000th                                                        | [59]             |
| MoC <sub>x</sub> nano-octahedrons                                                            | 0.5 M $\text{H}_2\text{SO}_4$                   | 0.8 $\text{mg/cm}^2$                     | 142                                                      | 53                                      | About 167, 1000th                                                        | [60]             |
| Pt-MoS <sub>2</sub>                                                                          | 0.5 M $\text{H}_2\text{SO}_4$                   | 75 $\mu\text{g/cm}^2$                    | 53                                                       | 40                                      | ---                                                                      | [61]             |
| Pt MLAg NF/Ni foam                                                                           | 0.5 M $\text{H}_2\text{SO}_4$                   | ---                                      | About 70                                                 | 53                                      | ---                                                                      | [62]             |
| AB&Co-Cl <sub>4</sub> -MOF(3:4)                                                              | 0.5 M $\text{H}_2\text{SO}_4$                   | ---                                      | 283                                                      | 86                                      | About 285, 1000th                                                        | [63]             |
| AB&CTGU-9 (3:4)                                                                              | 0.5 M $\text{H}_2\text{SO}_4$                   | About 0.0706 $\text{mg/cm}^2$            | 128                                                      | 87                                      | About 128, 21h                                                           | [64]             |
| MoP@PC                                                                                       | 0.5 M $\text{H}_2\text{SO}_4$                   | 0.41 $\text{mg/cm}^2$                    | 153                                                      | 66                                      | About 155, 2000th                                                        | [65]             |
| <b>RuP@PNDCN</b>                                                                             | <b>0.5 M <math>\text{H}_2\text{SO}_4</math></b> | <b>0.285 <math>\text{mg/cm}^2</math></b> | <b>65</b>                                                | <b>50</b>                               | ---                                                                      | <b>This work</b> |
| <b>Pristine Ru<sub>2</sub>O/TiN/TiO<sub>2</sub>@PNDCN</b>                                    | <b>0.5 M <math>\text{H}_2\text{SO}_4</math></b> | <b>0.285 <math>\text{mg/cm}^2</math></b> | <b>67</b>                                                | <b>51</b>                               | ---                                                                      | <b>This work</b> |
| <b>Ru<sub>2</sub>O/TiN/TiO<sub>2</sub>@PNDCN(dark)</b>                                       | <b>0.5 M <math>\text{H}_2\text{SO}_4</math></b> | <b>0.285 <math>\text{mg/cm}^2</math></b> | <b>65</b>                                                | <b>50</b>                               | ---                                                                      | <b>This work</b> |
| <b>Ru<sub>2</sub>O/TiN/TiO<sub>2</sub>@PNDCN(light)</b>                                      | <b>0.5 M <math>\text{H}_2\text{SO}_4</math></b> | <b>0.285 <math>\text{mg/cm}^2</math></b> | <b>33</b>                                                | <b>34</b>                               | ---                                                                      | <b>This work</b> |

**Table S7.** Reported catalysts for HER in alkaline electrolyte.

| Name                                      | Electrolyte      | Catalyst Loading               | Overpotential<br>( $j = 10 \text{ mA cm}^{-2}$ )<br>(mV) | Tafel slope<br>( $\text{mV dec}^{-1}$ ) | Overpotential<br>( $j = 10 \text{ mA cm}^{-2}$ )<br>after certain cycles | Reference        |
|-------------------------------------------|------------------|--------------------------------|----------------------------------------------------------|-----------------------------------------|--------------------------------------------------------------------------|------------------|
| Ru@C <sub>2</sub> N                       | 1.0 M KOH        | 0.285 mg/cm <sup>2</sup>       | 17                                                       | 38                                      | about 45, 10000th                                                        | [44]             |
| Pt/C                                      | 1.0 M KOH        | 0.285 mg/cm <sup>2</sup>       | 20.7                                                     | 43                                      | ---                                                                      | [44]             |
| CoN <sub>x</sub> /C                       | 0.1 M KOH        | 2 mg/cm <sup>2</sup>           | 170                                                      | 75                                      | ---                                                                      | [56]             |
| MoC <sub>x</sub> nano-octahedrons         | 1.0 M KOH        | 0.8 mg/cm <sup>2</sup>         | 151                                                      | 59                                      | About 195, 3000th                                                        | [60]             |
| S-4                                       | 1.0 M KOH        | 0.275 mg/cm <sup>2</sup>       | 28                                                       | 31                                      | 32, 10000th                                                              | [66]             |
| CoMoS <sub>x</sub>                        | 0.1 M KOH        | 50 $\mu\text{g cm}^{-2}$       | About 158 ( $j = 5 \text{ mA cm}^{-2}$ )                 | ---                                     | ---                                                                      | [67]             |
| Co(OH) <sub>2</sub> /Pt(111)              | 0.1 M KOH        | ---                            | About 248                                                | ---                                     | ---                                                                      | [68]             |
| np-CuTi                                   | 0.1 M KOH        | ---                            | About 47                                                 | 110                                     | About 50, 5000th                                                         | [69]             |
| NiO/Ni-CNT                                | 1.0 M KOH        | 0.28 mg/cm <sup>2</sup>        | About 86                                                 | 82                                      | ---                                                                      | [70]             |
| NiFeO <sub>x</sub> /CFP                   | 1.0 M KOH        | 1.6 mg/cm <sup>2</sup>         | 88                                                       | 150                                     | ---                                                                      | [71]             |
| Co@N-CS/N-HCP@CC                          | 1.0 M KOH        | About 3.2 mg/cm <sup>2</sup>   | 66                                                       | 65                                      | About 66, 30 h                                                           | [72]             |
| Ni QD@NC@rGO                              | 1.0 M KOH        | 0.71 mg/cm <sup>2</sup>        | 133                                                      | 64                                      | About 133, 30 h                                                          | [73]             |
| Co-Co <sub>9</sub> S <sub>8</sub> @SN-CNT | 0.1 M KOH        | 0.4 mg/cm <sup>2</sup>         | 120                                                      | 92                                      | 139, 5000th                                                              | [74]             |
| Co/Co <sub>9</sub> S <sub>8</sub> @SNGS   | 0.1 M KOH        | 0.305 mg/cm <sup>2</sup>       | 350                                                      | 96.1                                    | ---                                                                      | [75]             |
| Ni <sub>2</sub> P/rGO                     | 1.0 M KOH        | 0.25 mg/cm <sup>2</sup>        | 142                                                      | 58                                      | About 145, 2000th                                                        | [76]             |
| MoP/NF                                    | 1.0 M KOH        | 0.3 mg/cm <sup>2</sup>         | 114                                                      | 54.6                                    | About 115, 1000th                                                        | [77]             |
| Ni@NC                                     | 1.0 M KOH        | About 0.31 mg/cm <sup>2</sup>  | 205                                                      | 160                                     | About 205, 1000th                                                        | [78]             |
| FeCo@NGC                                  | 1.0 M KOH        | 0.32 mg/cm <sup>2</sup>        | 211                                                      | 77                                      | 211, 10000th                                                             | [79]             |
| NiS <sub>2</sub> @C                       | 1.0 M KOH        | 0.21 mg/cm <sup>2</sup>        | 219                                                      | 157                                     | About 300, 10 h                                                          | [80]             |
| ZnCoS-NSCNT/NP                            | 1.0 M KOH        | About 0.21 mg/cm <sup>2</sup>  | 152                                                      | 103                                     | About 155, 1000th                                                        | [81]             |
| Co-Ni-Se/C/NF                             | 1.0 M KOH        | 1.5 mg/cm <sup>2</sup>         | 148                                                      | 81                                      | ---                                                                      | [82]             |
| Co <sub>1.11</sub> Te <sub>2</sub> /C     | 1.0 M KOH        | ---                            | 178                                                      | 77.3                                    | About 200, 20 h                                                          | [83]             |
| Co-P/NC                                   | 1.0 M KOH        | 0.283 mg/cm <sup>2</sup>       | 154                                                      | 51                                      | 157, 1000th                                                              | [84]             |
| Ni <sub>2</sub> P/C                       | 1.0 M KOH        | About 0.34 mg/cm <sup>2</sup>  | 168                                                      | 63                                      | About 175, 1000th                                                        | [85]             |
| NDCHN-35                                  | 1.0 M KOH        | 0.5 mg/cm <sup>2</sup>         | 201                                                      | 133.2                                   | ---                                                                      | [86]             |
| Ni-Co-S HPNA                              | 1.0 M KOH        | ---                            | 110                                                      | 56                                      | About 110, 5000th                                                        | [87]             |
| Fe <sub>1</sub> V <sub>3</sub> -PC/NF     | 1.0 M KOH        | ---                            | 66                                                       | 37                                      | About 66, 5000th                                                         | [88]             |
| <b>RuP@PNDCN</b>                          | <b>1.0 M KOH</b> | <b>0.285 mg/cm<sup>2</sup></b> | <b>74</b>                                                | <b>59</b>                               | <b>---</b>                                                               | <b>This work</b> |

**Table S8.** Reported catalysts for OER in acidic electrolyte.

| Name                                                                | Electrolyte                                     | Working electrode    | Catalyst Loading                                          | Overpotential<br>( $j = 10 \text{ mA cm}^{-2}$ )<br>(mV) | Tafel slope<br>( $\text{mV dec}^{-1}$ ) | Reference        |
|---------------------------------------------------------------------|-------------------------------------------------|----------------------|-----------------------------------------------------------|----------------------------------------------------------|-----------------------------------------|------------------|
| $\text{Cr}_{0.6}\text{Ru}_{0.4}\text{O}_2$ (550)                    | 0.5 M $\text{H}_2\text{SO}_4$                   | glassy carbon        | 0.283 $\text{mg/cm}^2$                                    | 178                                                      | 58                                      | [89]             |
| $\text{RuO}_2$                                                      | 0.5 M $\text{H}_2\text{SO}_4$                   | glassy carbon        | 0.283 $\text{mg/cm}^2$                                    | 297                                                      | 64                                      | [89]             |
| Ir/GF                                                               | 0.5 M $\text{H}_2\text{SO}_4$                   | graphite foam        | 0.82 $\text{mg/cm}^2$                                     | 290                                                      | 46                                      | [90]             |
| IrCoNi PHNCs                                                        | 0.1 M $\text{HClO}_4$                           | glassy carbon        | 10 $\mu\text{g}_{\text{Ir}}/\text{cm}^2$                  | 303                                                      | 60.1                                    | [91]             |
| $\text{Y}_2\text{Ru}_2\text{O}_7\text{-s}$                          | 0.1 M $\text{HClO}_4$                           | glassy carbon        | ---                                                       | 270                                                      | 55                                      | [92]             |
| $\text{BaYIrO}_6$                                                   | 0.1 M $\text{HClO}_4$                           | Pt ring–Au disk      | 15 $\mu\text{g}_{\text{oxide}}/\text{cm}_{\text{disk}}^2$ | ~315                                                     | 219                                     | [93]             |
| $\text{RuO}_2/\text{Co}_3\text{O}_4\text{-RuCo@NC}$                 | 0.5 M $\text{H}_2\text{SO}_4$                   | glassy carbon        | 0.35 $\text{mg/cm}^2$                                     | 247                                                      | 89                                      | [94]             |
| $\text{MnO}_2$                                                      | 1 M $\text{H}_2\text{SO}_4$                     | ---                  | ---                                                       | 489                                                      | 80                                      | [95]             |
| $\text{Co}_3\text{O}_4/\text{FTO}$                                  | 0.5 M $\text{H}_2\text{SO}_4$                   | ---                  | ---                                                       | 570                                                      | 80                                      | [96]             |
| NiFeP                                                               | 0.05 M $\text{H}_2\text{SO}_4$                  | glassy carbon        | ---                                                       | 540                                                      | ---                                     | [97]             |
| $\text{Sr}_{0.9}\text{Na}_{0.05}\text{RuO}_3$                       | 0.1 M $\text{HClO}_4$                           | glassy carbon        | 0.51 $\text{mg/cm}^2$                                     | 120                                                      | ~40                                     | [98]             |
| <b><math>\text{Fe}_3\text{O}_4/\text{RuO}_2\text{@NEU-7}</math></b> | <b>0.5 M <math>\text{H}_2\text{SO}_4</math></b> | <b>glassy carbon</b> | <b>0.255 <math>\text{mg/cm}^2</math></b>                  | <b>450</b>                                               | <b>305</b>                              | <b>This work</b> |

**Table S9.** Reported catalysts for OER in alkaline electrolyte.

| Name                                                     | Electrolyte    | Working electrode    | Catalyst Loading               | Overpotential<br>( $j = 10 \text{ mA cm}^{-2}$ )<br>(mV) | Tafel slope<br>( $\text{mV dec}^{-1}$ ) | Reference        |
|----------------------------------------------------------|----------------|----------------------|--------------------------------|----------------------------------------------------------|-----------------------------------------|------------------|
| Ni-O-G SACs                                              | 1.0 M KOH      | Carbon cloth         | 0.5 mg/cm <sup>2</sup>         | 328                                                      | 84                                      | [99]             |
| Ni-N-G SACs                                              | 1.0 M KOH      | Carbon cloth         | 0.5 mg/cm <sup>2</sup>         | 564                                                      | 364                                     | [99]             |
| Ni(OH) <sub>2</sub> /G                                   | 1.0 M KOH      | Carbon cloth         | 0.5 mg/cm <sup>2</sup>         | 450                                                      | 142                                     | [99]             |
| Ce-NiO-E                                                 | 1.0 M KOH      | carbon paper         | ~0.56 mg/cm <sup>2</sup>       | 382                                                      | 118.7                                   | [100]            |
| Ce-NiO-L                                                 | 1.0 M KOH      | carbon paper         | ~0.56 mg/cm <sup>2</sup>       | 426                                                      | 131.6                                   | [100]            |
| NiO                                                      | 1.0 M KOH      | carbon paper         | ~0.56 mg/cm <sup>2</sup>       | 467                                                      | 140.7                                   | [100]            |
| FeNC/NiO                                                 | 0.1 M KOH      | glassy carbon        | ~0.24 mg/cm <sup>2</sup>       | 390                                                      | 76                                      | [101]            |
| Commercial RuO <sub>2</sub>                              | 0.1 M KOH      | glassy carbon        | ~0.24 mg/cm <sup>2</sup>       | 380                                                      | ~91                                     | [101]            |
| Ni/N/C paper                                             | 0.1 M KOH      | glassy carbon        | 0.4 mg/cm <sup>2</sup>         | 391                                                      | 40                                      | [102]            |
| Ni/NG                                                    | 0.1 M KOH      | ---                  | 1.74 mg/cm <sup>2</sup>        | 397                                                      | 188.6                                   | [103]            |
| Co <sub>3</sub> O <sub>4</sub> /N-rmGO                   | 1 M KOH        | glassy carbon        | 0.1 mg/cm <sup>2</sup>         | 310                                                      | 67                                      | [104]            |
| Mn <sub>3</sub> O <sub>4</sub> /CoSe <sub>2</sub>        | 0.1 M KOH      | glassy carbon        | ~0.2 mg/cm <sup>2</sup>        | 450                                                      | 49                                      | [105]            |
| NiCo-UMOFNs                                              | 1.0 M KOH      | glassy carbon        | 0.2 mg/cm <sup>2</sup>         | 189                                                      | 42                                      | [106]            |
| Ni-UMOFNs                                                | 1.0 M KOH      | glassy carbon        | 0.2 mg/cm <sup>2</sup>         | 321                                                      | 65                                      | [106]            |
| Co-UMOFNs                                                | 1.0 M KOH      | glassy carbon        | 0.2 mg/cm <sup>2</sup>         | 371                                                      | 103                                     | [106]            |
| Bulk NiCo-MOFs                                           | 1.0 M KOH      | glassy carbon        | 0.2 mg/cm <sup>2</sup>         | 250                                                      | 61                                      | [106]            |
| CoBDC-NF                                                 | 1.0 M KOH      | glassy carbon        | 0.35 mg/cm <sup>2</sup>        | 252                                                      | 63                                      | [107]            |
| CoBDC-Fc-NF                                              | 1.0 M KOH      | glassy carbon        | 0.35 mg/cm <sup>2</sup>        | 178                                                      | 51                                      | [107]            |
| RuO <sub>2</sub> -NF                                     | 1.0 M KOH      | glassy carbon        | 0.35 mg/cm <sup>2</sup>        | 235                                                      | 88                                      | [107]            |
| FeCo-ONS                                                 | 0.1 M KOH      | glassy carbon        | 0.36 mg/cm <sup>2</sup>        | 318                                                      | 38.3                                    | [108]            |
| FeCo-MNS-0.4                                             | 0.1 M KOH      | glassy carbon        | 0.36 mg/cm <sup>2</sup>        | 309                                                      | 24.5                                    | [108]            |
| FeCo-MNS-1.0                                             | 0.1 M KOH      | glassy carbon        | 0.36 mg/cm <sup>2</sup>        | 298                                                      | 21.6                                    | [108]            |
| FeCo-MNS-2.0                                             | 0.1 M KOH      | glassy carbon        | 0.36 mg/cm <sup>2</sup>        | 312                                                      | 23.7                                    | [108]            |
| NiCo/Fe <sub>3</sub> O <sub>4</sub> /MOF-74              | 1.0 M KOH      | glassy carbon        | ---                            | 238                                                      | 29                                      | [109]            |
| Fe <sub>1</sub> Co <sub>1</sub> -P/C                     | 1.0 M KOH      | ---                  | ---                            | 360                                                      | 58.4                                    | [110]            |
| <b>Fe<sub>3</sub>O<sub>4</sub>/RuO<sub>2</sub>@NEU-7</b> | <b>1 M KOH</b> | <b>glassy carbon</b> | <b>0.255 mg/cm<sup>2</sup></b> | <b>250</b>                                               | <b>266</b>                              | <b>This work</b> |

### 3. References

- [1] W. Gu, L. Hu, J. Li, E. Wang, *ACS Appl. Mater. Interfaces*, 8 (2016) 35281-35288.
- [2] S. Ma, G. A. Goenaga, A. V. Call, D.-J. Liu, *Chem. Eur. J.*, 17 (2011) 2063-2067.
- [3] W. Xia, J. Zhu, W. Guo, L. An, D. Xia, R. Zou, *J. Mater. Chem. A*, 2 (2014) 11606-11613.
- [4] X. Wang, J. Zhou, H. Fu, W. Li, X. Fan, G. Xin, J. Zheng, X. Li, *J. Mater. Chem. A*, 2 (2014) 14064-14070.
- [5] A. K. Diaz-Duran, F. Roncaroli, *Electrochimica Acta*, 251 (2017) 638-650.
- [6] C. Zhang, B. An, L. Yang, B. Wu, W. Shi, Y.-C. Wang, L.-S. Long, C. Wang, W. Lin, *J. Mater. Chem. A*, 4 (2016) 4457-4463.
- [7] Q. Lai, L. Zheng, Y. Liang, J. He, J. Zhao, J. Chen, *ACS Catal.*, 7 (2017) 1655-1663.
- [8] L. Chong, G. A. Goenaga, K. Williams, H. M. Barkholtz, L., R. Grabstanowicz, J. A. Brooksbank, A. B. Papandrew, R. Elzein, R. Schlaf, T. A. Zawodzinski, J. Zou, S. Ma, D.-J. Liu, *ChemElectroChem*, 3 (2016) 1541-1545.
- [9] B. You, N. Jiang, M. Sheng, W. S. Drisdell, J. Yano, J. Sun, *ACS Catal.*, 5 (2015) 7068-7076.
- [10] C. Zhang, Y.-C. Wang, B. An, R. Huang, C. Wang, Z. Zhou, W. Lin, *Adv. Mater.*, 29 (2017) 1-7.
- [11] H. M. Barkholtz, L. Chong, Z. B. Kaiser, D. J. Liu, *FUEL CELLS*, 16 (2016) 428-433.
- [12] D. Zhao, J.-L. Shui, L. R. Grabstanowicz, C. Chen, S. M. Commet, T. Xu, J. Lu, D.-J. Liu, *Adv. Mater.*, 26 (2014) 1093-1097.
- [13] K. Strickland, E. Miner, Q. Jia, U. Tylus, N. Ramaswamy, W. Liang, M.-T. Sougrati, F. Jaouen, S. Mukerjee, *Nature Communications*, 6 (2015) 1-8.
- [14] J. Li, Q. Jia, S. Ghoshal, W. Liang, S. Mukerjee, *Langmuir*, 33 (2017) 9246-9253.

- [15] Q. Li, P. Xu, W. Gao, S. Ma, G. Zhang, R. Cao, J. Cho, H.-L. Wang, G. Wu, *Adv. Mater.*, 26 (2014) 1378-1386.
- [16] J. Shui, C. Chen, L. Grabstanowicz, D. Zhao, D.-L. Liu, *PNAS*, 112 (2015) 10629-10634.
- [17] X. Wang, H. Zhang, H. Lin, S. Gupta, C. Wang, Z. Tao, H. Fu, T. Wang, J. Zheng, G. Wu, X. Li, *Nano Energy*, 25 (2016) 110-119.
- [18] J. Li, M. Chen, D. A. Cullen, S. Hwang, M. Wang, B. Li, K. Liu, S. Karakalos, M. Lucero, H. Zhang, C. Lei, H. Xu, G. E. Sterbinsky, Z. Feng, D. Su, K. L. More, G. Wang, Z. Wang, G. Wu, *Nature Catalysis*, 1 (2018) 935-945.
- [19] X. X. Wang, D. A. Cullen, Y.-T. Pan, S. Hwang, M. Wang, Z. Feng, J. Wang, M. H. Engelhard, H. Zhang, Y. He, Y. Shao, D. Su, K. L. More, J. S. Spendelow, G. Wu, *Adv. Mater.*, 30 (2018) 1-11.
- [20] H. T. Chung, D. A. Cullen, D. Higgins, B. T. Sneed, E. F. Holby, K. L. More, P. Zelenay, *Science*, 357 (2017) 479-484.
- [21] H. Zhang, S. Hwang, M. Wang, Z. Feng, S. Karakalos, L. Luo, Z. Qiao, X. Xie, C. Wang, D. Su, Y. Shao, G. Wu, *J. Am. Chem. Soc.*, 139 (2017) 14143-14149.
- [22] F.-F. Wang, P.-J. Wei, G.-Q. Yu, J.-G. Liu, *Chem. Eur. J.*, 22 (2016) 382-389.
- [23] Y. Fang, X. Li, F. Li, X. Lin, M. Tian, X. Long, X. An, Y. Fu, J. Jin, J. Ma, *Journal of Power Sources*, 326 (2016) 50-59.
- [24] H. Wang, F.-X. Yin, B.-H. Chen, X.-B. He, P.-L. Lv, C.-Y. Ye, D.-J. Liu, *Applied Catalysis B: Environmental*, 205 (2017) 55-67.
- [25] C. Lin, S. S. Shinde, Z. Jiang, X. Song, Y. Sun, L. Guo, H. Zhang, J.-Y. Jung, X. Li, J.-H. Lee, *J. Mater. Chem. A*, 5 (2017) 13994-14002.
- [26] Y. Liu, H. Wang, D. Lin, J. Zhao, C. Liu, J. Xie, Y. Cui, *Nano Research*, 10 (2017) 1213-1222.



- [27] A. Aijaz, J. Masa, C. Rösler, H. Antoni, R. A. Fischer, W. Schuhmann, M. Muhler, *Chem. Eur. J.*, 23 (2017) 12125-12130.
- [28] Y. Wang, X. Chen, Q. Lin, A. Kong, Q.-G. Zhai, S. Xie, P. Feng, *Nanoscale*, 9 (2017) 862-868.
- [29] J. Wang, H. Lu, Q. Hong, Y. Cao, X. Li, J. Bai, *Chemical Engineering*, 330 (2017) 1342-1350.
- [30] S. H. Ahn, X. Yu, A. Manthiram, *Adv. Mater.*, 29 (2017) 1-10.
- [31] L. Huang, X. Zhang, Y. Han, Q. Wang, Y. Fang, S. Dong, *J. Mater. Chem. A.*, 5 (2017) 18610-18617.
- [32] S. H. Ahn, M. J. Klein, A. Manthiram, *Adv. Energy Mater.*, 7 (2017) 1-9.
- [33] T. Zhou, Y. Du, S. Yin, X. Tian, H. Yang, X. Wang, B. Liu, H. Zheng, S. Qiao, R. Xu, *Energy Environ. Sci.*, 9 (2016) 2563-2570.
- [34] H. Sun, H. Su, X. Ma, P. Zhang, X. Zhang, X. Dai, J. Gao, C. Chen, S.-G. Sun, *Electrochimica Acta*, 205 (2016) 53-61.
- [35] S. G. Peera, J. Balamurugan, N. H. Kim, J. H. Lee, *Small*, 14 (2018) 1-15.
- [36] P. Yin, T. Yao, Y. Wu, L. Zheng, Y. Lin, W. Liu, H. Ju, J. Zhu, X. Hong, Z. Deng, G. Zhou, S. Zhou, Y. Li, *Angew. Chem. Int. Ed.*, 55 (2016) 10800-10805.
- [37] J. Xiao, C. Zhao, C. Hu, J. Xi, S. Wang, *Journal of Power Sources*, 348 (2017) 57-65.
- [38] S. S. A. Shah, L. Peng, T. Najam, C. Cheng, G. Wu, Y. Nie, W. Ding, X. Qi, S. Chen, Z. Wei, *Electrochimica Acta*, 251 (2017) 498-504.
- [39] B. Y. Xia, Y. Yan, N. Li, H. B. Wu, X. W. Lou, X. Wang, *Nature Energy*, 1 (2016) 1-8.
- [40] J. McAllister, N. A. G. Bandeira, J. C. McGlynn, A. Y. Ganin, Y.-F. Song, C. Bo, H. N. Miras, *Nature Communications*, 10 (2019) 1-10.

- [41] Y. Yang, Z. Lun, G. Xia, F. Zheng, M. He, Q. Chen, *Energy Environ. Sci.*, 8 (2015) 3563-3571.
- [42] J. Deng, P. Ren, D. Deng, L. Yu, F. Yang, X. Bao, *Energy Environ. Sci.*, 7 (2014) 1919-1923.
- [43] J. Deng, P. Ren, D. Deng, X. Bao, *Angew. Chem. Int. Ed.*, 54 (2015) 2100-2104.
- [44] J. Mahmood, F. Li, S.-M. Jung, M. S. Okyay, I. Ahmad, S.-J. Kim, N. Park, H. Y. Jeong, J.-B. Baek, *Nature Nanotechnology*, 12 (2017) 441-447.
- [45] J. Kibsgaard, T. F. Jaramillo, F. Besenbacher, *Nature Chemistry*, 6 (2014) 248-253.
- [46] M. Cabán-Acevedo, M. L. Stone, J. R. Schmidt, J. G. Thomas, Q. Ding, H.-C. Chang, M.-L. Tsai, J.-H. He, S. Jin, *Nature Materials*, 14 (2015) 1245-1251.
- [47] H. Li, C. Tsai, A. L. Koh, L. Cai, A. W. Contryman, A. H. Fragapane, J. Zhao, H. S. Han, H. C. Manoharan, F. Abild-Pedersen, J. K. Nørskov, X. Zheng, *Nature Materials*, 15 (2016) 48-53.
- [48] D. Voiry, H. Yamaguchi, J. Li, R. Silva, D. C. B. Alves, T. Fujita, M. Chen, T. Asefa, V. B. Shenoy, G. Eda, M. Chhowalla, *Nature Materials*, 12 (2013) 850-855.
- [49] J. Staszak-Jirkovský, C. D. Malliakas, P. P. Lopes, N. Danilovic, S. S. Kota, K.-C. Chang, B. Genorio, D. Strmcnik, V. R. Stamenkovic, M. G. Kanatzidis, M. M. Markovic, *Nature Materials*, 15 (2016) 197-203.
- [50] J. Kibsgaard, Z. Chen, B. N. Reinecke, T. F. Jaramillo, *Nature Materials*, 11 (2012) 963- 969.
- [51] L. Fan, P. F. Liu, X. Yan, L. Gu, Z. Z. Yang, H. G. Yang, S. Qiu, X. Yao, *Nature Communications*, 7 (2016) 1-7.
- [52] W. Liu, E. Hu, H. Jiang, Y. Xiang, Z. Weng, M. Li, Q. Fan, X. Yu, E. I. Altman, H. Wang, *Nature Communications*, 7 (2016) 1-9.

- [53] X. Geng, W. Sun, W. Wu, B. Chen, A. Al-Hilo, M. Benamara, H. Zhu, F. Watanabe, J. Cui, T.-P. Chen, *Nature Communications*, 7 (2016) 1-7.
- [54] Y. H. Li, P. F. Liu, L. F. Pan, H. F. Wang, Z. Z. Yang, L. R. Zheng, P. Hu, H. J. Zhao, L. Gu, H. G. Yang, *Nature Communications*, 6 (2015) 1-7.
- [55] M.-R. Gao, J.-X. Liang, Y.-R. Zheng, Y.-F. Xu, J. Jiang, Q. Gao, J. Li, S.-H. Yu, *Nature Communications*, 6 (2015) 1-7.
- [56] H.-W. Liang, S. Brüller, R. Dong, J. Zhang, X. Feng, K. Müllen, *Nature Communications*, 6 (2015) 1-8.
- [57] M.-R. Gao, M. K. Y. Chan, Y. Sun, *Nature Communications*, 6 (2015) 1-8.
- [58] Y. Zheng, Y. Jiao, Y. Zhu, L. H. Li, Y. Han, Y. Chen, A. Du, M. Jaroniec, S. Z. Qiao, *Nature Communications*, 5 (2014) 1-8.
- [59] H. Fei, J. Dong, M. J. Arellano-Jiménez, G. Ye, N. D. Kim, E. L. G. Samuel, Z. Peng, Z. Zhu, F. Qin, J. Bao, M. J. Yacaman, P. M. Ajayan, D. Chen, J. M. Tour, *Nature Communications*, 6 (2015) 1-8.
- [60] H. B. Wu, B. Y. Xia, L. Yu, X.-Y. Yu, X. W. Lou, *Nature Communications*, 6 (2015) 1-8.
- [61] X. Huang, Z. Zeng, S. Bao, M. Wang, X. Qi, Z. Fan, H. Zhang, *Nature Communications*, 4 (2013) 1-8.
- [62] M. Li, Q. Ma, W. Zi, X. Liu, X. Zhu, S. Liu, *Sci. Adv.*, 1 (2015) 1-7.
- [63] Y.-S. Li, J.-W. Yi, J.-H. Wei, Y.-P. Wu, B. Li, S. Liu, C. Jiang, H.-G. Yu, D.-S. Li, *Journal of Solid State Chemistry*, 281 (2020) 1-7.
- [64] W. Zhou, Y.-P. Wu, X. Wang, J.-W. Tian, D.-D. Huang, J. Zhao, Y.-Q. Lan, D.-S. Li, *CrystEngComm*, 20 (2018) 4804-4809.
- [65] J. Yang, F. Zhang, X. Wang, D. He, G. Wu, Q. Yang, X. Hong, Y. Wu, Y. Li, *Angew. Chem. Int. Ed.*, 55 (2016) 12854-12858.

- [66] J. Su, Y. Yang, G. Xia, J. Chen, P. Jiang, Q. Chen, *Nature Communications*, 8 (2017) 1-10.
- [67] J. Staszak-Jirkovský, C. D. Malliakas, P. P. Lopes, N. Danilovic, S. S. Kota, K.-C. Chang, B. Genorio, D. Strmcnik, V. R. Stamenkovic, M. G. Kanatzidis, N. M. Markovic, *Nature Materials*, 15 (2016) 197-203.
- [68] R. Subbaraman, D. Tripkovic, K.-C. Chang, D. Strmcnik, A. P. Paulikas, P. Hirunsit, M. Chan, J. Greeley, V. Stamenkovic, N. M. Markovic, *Nature Materials*, 11 (2012) 550-557.
- [69] Q. Lu, G. S. Hutchings, W. Yu, Y. Zhou, R. V. Forest, R. Tao, J. Rosen, B. T. Yonemoto, Z. Cao, H. Zheng, J. Q. Xiao, F. Jiao, J. G. Chen, *Nature Communications*, 6 (2015) 1-8.
- [70] M. Gong, W. Zhou, M.-C. Tsai, J. Zhou, M. Guan, M.-C. Lin, B. Zhang, Y. Hu, D.-Y. Wang, J. Yang, S. J. Pennycook, B.-J. Hwang, H. Dai, *Nature Communications*, 5 (2014) 1-6.
- [71] H. Wang, H.-W. Lee, Y. Deng, Z. Lu, P.-C. Hsu, Y. Liu, D. Lin, Y. Cui, *Nature Communications*, 6 (2015) 1-8.
- [72] Z. Chen, Y. Ha, H. Jia, X. Yan, M. Chen, M. Liu, R. Wu, *Adv. Energy Mater.*, 9 (2019) 1-13.
- [73] Z. Chen, H. Xu, Y. Ha, X. Li, M. Liu, R. Wu, *Applied Catalysis B: Environmental*, 250 (2019) 213-223.
- [74] H. Han, Z. Bai, T. Zhang, X. Wang, X. Yang, X. Ma, Y. Zhang, L. Yang, J. Lu, *Nano Energy*, 56 (2019) 724-732.
- [75] X. Zhang, S. Liu, Y. Zang, R. Liu, G. Liu, G. Wang, Y. Zhang, H. Zhang, H. Zhao, *Nano Energy*, 30 (2016) 93-102.
- [76] L. Yan, H. Jiang, Y. Xing, Y. Wang, D. Liu, X. Liu, P. Dai, L. Li, X. Zhao, *J. Mater. Chem. A*, 6 (2018) 1682-1691.
- [77] Y. Jiang, Y. Lu, J. Lin, X. Wang, Z. Shen, *Small Methods*, 2 (2018) 1-10.

- [78] Y. Xu, W. Tu, B. Zhang, S. Yin, Y. Huang, M. Kraft, R. Xu, *Adv. Mater.*, 29 (2017) 1-8.
- [79] Y. Yang, Z. Lin, S. Gao, J. Su, Z. Lun, G. Xia, J. Chen, R. Zhang, Q. Chen, *ACS Catal.*, 7 (2017) 469-479.
- [80] T. Tian, L. Huang, L. Ai, J. Jiang, *J. Mater. Chem. A*, 5 (2017) 20985-20992.
- [81] Z. Yu, Y. Bai, S. Zhang, Y. Liu, N. Zhang, K. Sun, *J. Mater. Chem. A*, 6 (2018) 10441-10446.
- [82] F. Ming, H. Liang, H. Shi, X. Xu, G. Mei, Z. Wang, *J. Mater. Chem. A*, 4 (2016) 15148-15155.
- [83] H. Wang, Y. Wang, L. Tan, L. Fang, X. Yang, Z. Yang, J. Li, H. Zhang, Y. Wang, *Applied Catalysis B: Environmental*, 244 (2019) 568-575.
- [84] B. You, N. Jiang, M. Sheng, S. Gul, J. Yano, Y. Sun, *Chem. Mater.*, 27 (2015) 7636-7642.
- [85] Q. Wang, Z. Liu, H. Zhao, H. Huang, H. Jiao, Y. Du, *J. Mater. Chem. A*, 6 (2018) 18720-18727.
- [86] L. Zhang, J.-S. Hu, X.-H. Huang, J. Song, S.-Y. Lu, *Nano Energy*, 48 (2018) 489-499.
- [87] W. Chen, Y. Zhang, G. Chen, R. Huang, Y. Wu, Y. Zhou, Y. Hu, K. Ostrikov, *Journal of Colloid and Interface Science*, 560 (2020) 426-435.
- [88] N. Suo, X. Han, C. Chen, X. He, Z. Dou, Z. Lin, L. Cui, J. Xiang, *Electrochimica Acta*, 333 (2020) 1-11.
- [89] Y. Lin, Z. Tian, L. Zhang, J. Ma, Z. Jiang, B. J. Deibert, R. Ge, L. Chen, *Nature Communications*, 10 (2019) 1-13.
- [90] J. Zhang, G. Wang, Z. Liao, P. Zhang, F. Wang, X. Zhuang, E. Zschech, X. Feng, *Nano Energy*, 40 (2017) 27-33.

- [91] J. Feng, F. Lv, W. Zhang, P. Li, K. Wang, C. Yang, B. Wang, Y. Yang, J. Zhou, F. Lin, G.-C. Wang, S. Guo, *Adv. Mater.*, 29 (2017) 1-8.
- [92] J. Kim, P.-C. Shih, K.-C. Tsao, Y.-T. Pan, X. Yin, C.-J. Sun, H. Yang, *J. Am. Chem. Soc.*, 139 (2017) 12076-12083.
- [93] O. Diaz-Morales, S. Raaijman, R. Kortlever, P. J. Kooyman, T. Wezendonk, J. Gascon, W. T. Fu, M. T. M. Koper, *Nature Communications*, 7 (2016) 1-6.
- [94] Z. Fan, J. Jiang, L. Ai, Z. Shao, S. Liu, *ACS Appl. Mater. Interfaces*, 11 (2019) 47894-47903.
- [95] A. Li, H. Ooka, N. Bonnet, T. Hayashi, Y. Sun, Q. Jiang, C. Li, H. Han, R. Nakamura, *Angew. Chem. Int. Ed.*, 58 (2019) 5054-5058.
- [96] J. S. Mondschein, J. F. Callejas, C. G. Read, J. Y. C. Chen, C. F. Holder, C. K. Badding, R. E. Schaak, *Chem. Mater.*, 29 (2017) 950-957.
- [97] F. Hu, S. Zhu, S. Chen, Y. Li, L. Ma, T. Wu, Y. Zhang, C. Wang, C. Liu, X. Yang, L. Song, X. Yang, Y. Xiong, *Adv. Mater.*, 29 (2017) 1-9.
- [98] M. Retuerto, L. Pascual, F. Calle-Vallejo, P. Ferrer, D. Gianolio, A. González Pereira, A. García, J. Torrero, M. T. Fernández-Díaz, P. Bencok, M. A. Peña, J. L. Fierro, S. Rojas, *Nature Communications*, 10 (2019) 1-9.
- [99] Y. Xu, W. Zhang, Y. Li, P. Lu, Z.-S. Wu, *Journal of Energy Chemistry*, 43 (2020) 52-57.
- [100] W. Gao, Z. Xia, F. Cao, J. C. Ho, Z. Jiang, Y. Qu, *Adv. Funct. Mater.*, 28 (2018) 1-8.
- [101] J. Wang, K. Li, H.-x. Zhong, D. Xu, Z.-l. Wang, Z. Jiang, Z.-j. Wu, X.-b. Zhang, *Angew. Chem. Int. Ed.*, 54 (2015) 10530-10534.
- [102] J. Ren, M. Antonietti, T.-P. Fellingner, *Adv. Energy Mater.*, 5 (2015) 1-6.
- [103] S. Chen, J. Duan, J. Ran, M. Jaroniec, Z. Qiao, *Energy Environ. Sci.*, 6 (2013) 3693-3699.

- [104] Y. Liang, Y. Li, H. Wang, J. Zhou, J. Wang, T. Regier, H. Dai, *Nature Materials*, 10 (2011) 780-786.
- [105] M.-R. Gao, Y.-F. Xu, J. Jiang, Y.-R. Zheng, S.-H. Yu, *J. Am. Chem. Soc.*, 134 (2012) 2930-2933.
- [106] S. Zhao, Y. Wang, J. Dong, C.-T. He, H. Yin, P. An, K. Zhao, X. Zhang, C. Gao, L. Zhang, J. Lv, J. Wang, J. Zhang, A. M. Khattak, N. A. Khan, Z. Wei, J. Zhang, S. Liu, H. Zhao, Z. Tang, *Nature Energy*, 1 (2016) 1-10.
- [107] Z. Xue, K. Liu, Q. Liu, Y. Li, M. Li, C.-Y. Su, N. Ogiwara, H. Kobayashi, H. Kitagawa, M. Liu, G. Li, *Nature Communications*, 10 (2019) 1-8.
- [108] L. Zhuang, L. Ge, H. Liu, Z. Jiang, Y. Jia, Z. Li, D. Yang, R. K. Hocking, M. Li, L. Zhang, X. Wang, X. Yao, Z. Zhu, *Angew. Chem. Int. Ed.*, 58 (2019) 13565-13572.
- [109] X. Wang, H. Xiao, A. Li, Z. Li, S. Liu, Q. Zhang, Y. Gong, L. Zheng, Y. Zhu, C. Chen, D. Wang, Q. Peng, L. Gu, X. Han, J. Li, Y. Li, *J. Am. Chem. Soc.*, 140 (2018) 15336-15341.
- [110] W. Hong, M. Kitta, Q. Xu, *Small Methods*, 2 (2018) 1-6.
